# Supplementary material for: Surface drifters in the German Bight: model validation considering windage and Stokes drift
Source: Copernicus journal article supplement (doi:10.5194/os-13-799-2017), 2017-09-26
Supplement: Supplementary file 6 [file os-13-799-2017-supplement.zip]

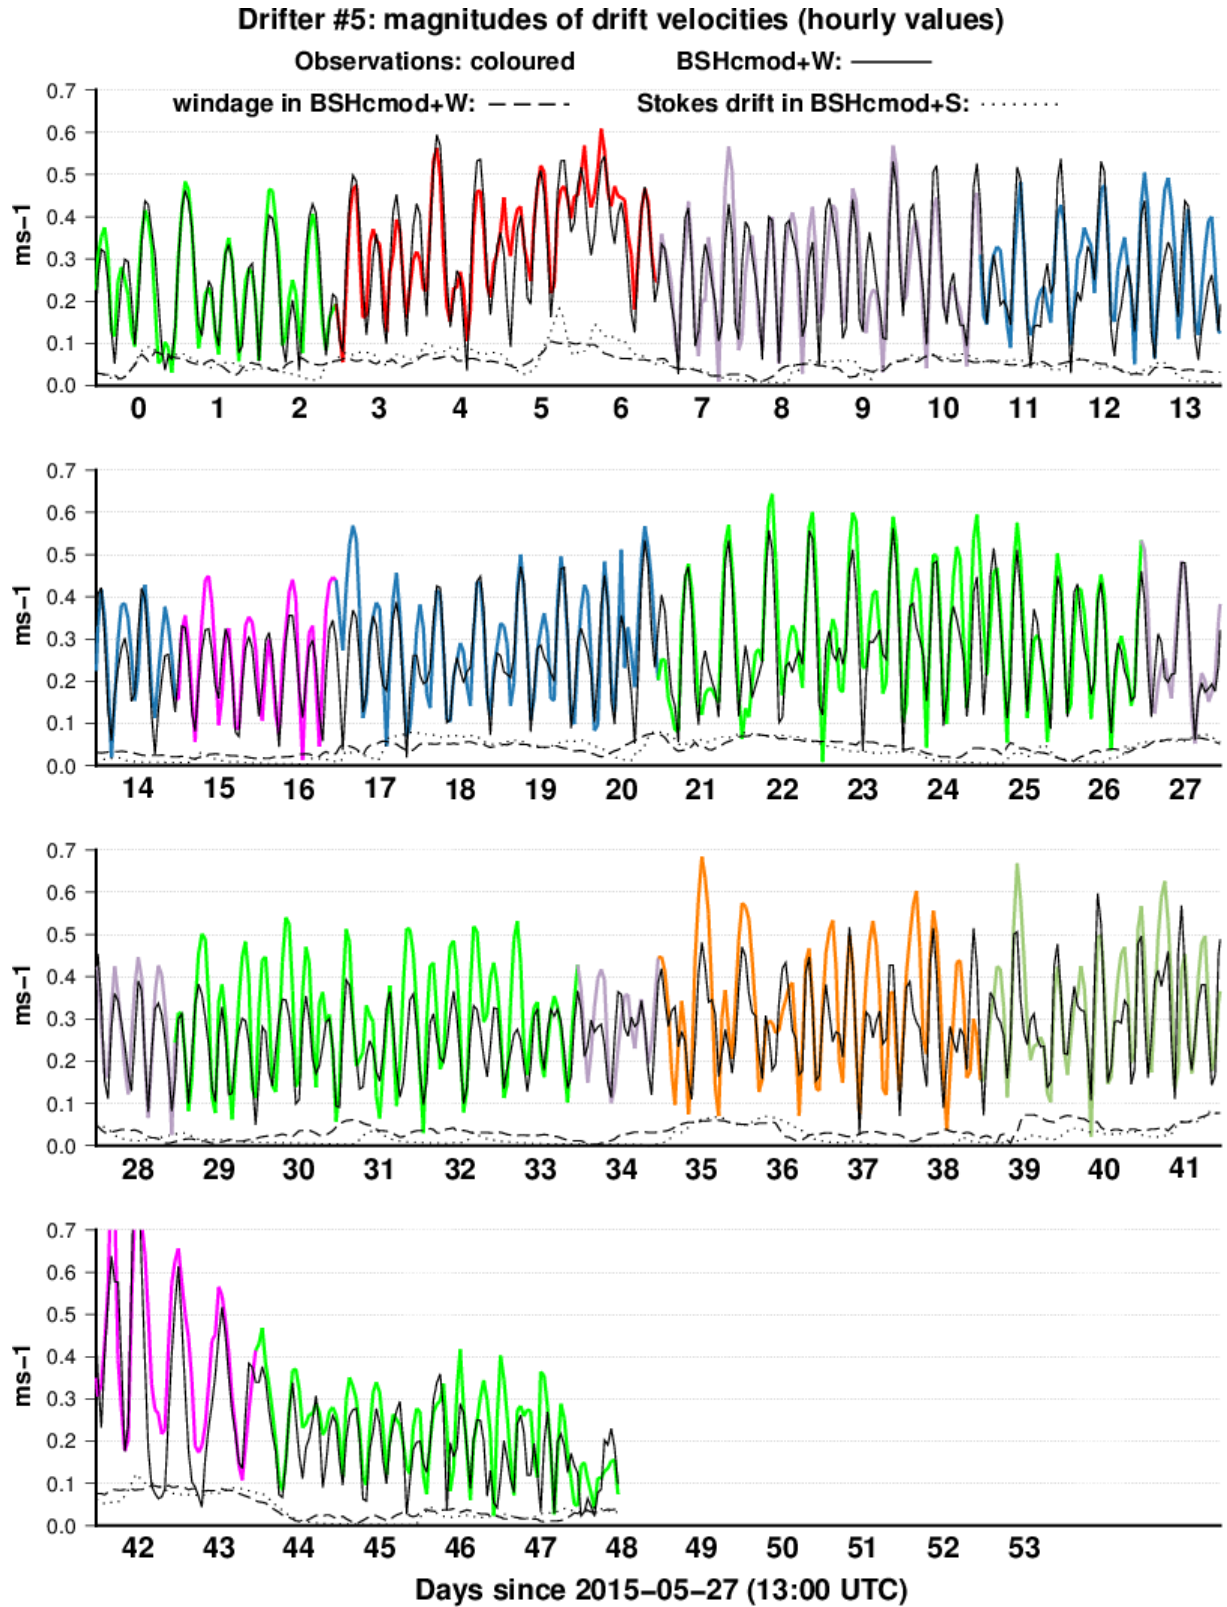

**Figure S1.** Full version of Fig. 12(a) in the manuscript. For drifter #5, magnitudes of observed velocity vectors (coloured) are compared with simulations based on BSHcmod+W. In addition, magnitudes of windage (in BSHcmod+W) and Stokes drift (in BSHcmod+S) are shown. All model values are specified from either atmospheric or marine fields interpolated to observed (not simulated!) drifter locations.

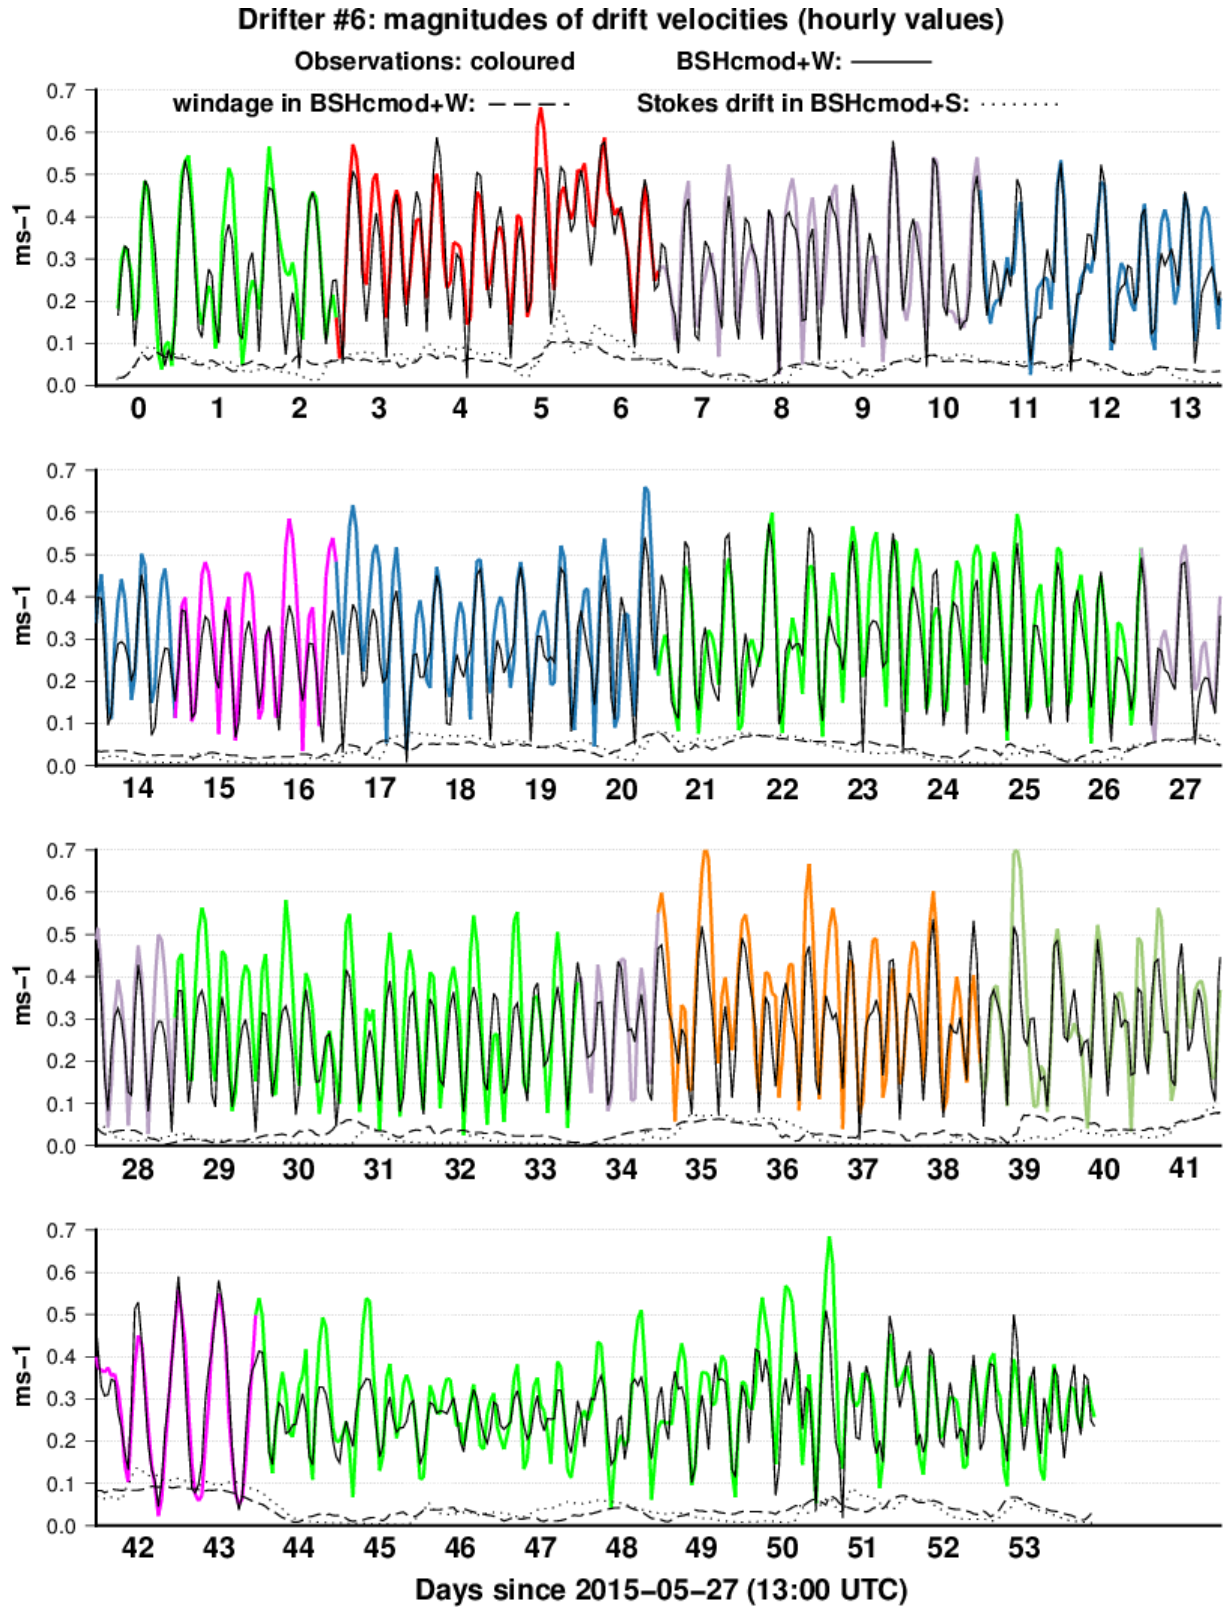

**Figure S2.** Full version of Fig. 12(b) in the manuscript. For drifter #6, magnitudes of observed velocity vectors (coloured) are compared with simulations based on BSHcmod+W. In addition, magnitudes of windage (in BSHcmod+W) and Stokes drift (in BSHcmod+S) are shown. All model values are specified from either atmospheric or marine fields interpolated to observed (not simulated!) drifter locations.
