# Supplementary material for: Surface drifters in the German Bight: model validation considering windage and Stokes drift
Source: Copernicus journal article supplement (doi:10.5194/os-13-799-2017), 2017-09-26
Supplement: Supplementary file 7 [file os-13-799-2017-supplement.zip]

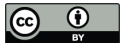

## *Supplement of*

# **Surface drifters in the German Bight: model validation considering windage and Stokes drift**

**Ulrich Callies et al.**

*Correspondence to:* Ulrich Callies ([ulrich.callies@hzg.de](mailto:ulrich.callies@hzg.de))

- [os-13-799-2017-supplement-title-page.pdf](#)
- Supplements
  - DATA\_FIG\_04
    - \* observations\_drifter\_1.dat
    - \* observations\_drifter\_5.dat
    - \* observations\_drifter\_6.dat
    - \* observations\_drifter\_7.dat
    - \* observations\_drifter\_8.dat
    - \* observations\_drifter\_9.dat
  - DATA\_FIG\_A1
    - \* BSHcmod\_drifter\_1.dat
    - \* BSHcmod\_drifter\_5.dat
    - \* BSHcmod\_drifter\_6.dat
    - \* BSHcmod\_drifter\_7.dat
    - \* BSHcmod\_drifter\_8.dat
    - \* BSHcmod\_drifter\_9.dat
  - DATA\_FIG\_A2
    - \* BSHcmod+W\_drifter\_1.dat
    - \* BSHcmod+W\_drifter\_5.dat
    - \* BSHcmod+W\_drifter\_6.dat
    - \* BSHcmod+W\_drifter\_7.dat
    - \* BSHcmod+W\_drifter\_8.dat
    - \* BSHcmod+W\_drifter\_9.dat
  - DATA\_FIG\_A3
    - \* BSHcmod+S\_drifter\_1.dat
    - \* BSHcmod+S\_drifter\_5.dat

- \* BSHcmod+S\_drifter\_6.dat
- \* BSHcmod+S\_drifter\_7.dat
- \* BSHcmod+S\_drifter\_8.dat
- \* BSHcmod+S\_drifter\_9.dat
- DATA\_FIG\_A4
  - \* TRIM\_drifter\_1.dat
  - \* TRIM\_drifter\_5.dat
  - \* TRIM\_drifter\_6.dat
  - \* TRIM\_drifter\_7.dat
  - \* TRIM\_drifter\_8.dat
  - \* TRIM\_drifter\_9.dat
- SM1-Observations.pdf
- SM2-BSHcmod\_vs\_TRIM.pdf
- SM3-BSHcmod+W\_vs\_TRIM.pdf
- SM4-BSHcmod+W\_vs\_BSHcmod+S.pdf
- SM5-Full-Version-Fig.12.pdf
- supplementary\_material.pdf

The copyright of individual parts of the supplement might differ from the CC BY 3.0 License.
