# Supplementary figures and images for: Surface drifters in the German Bight: model validation considering windage and Stokes drift
Source: Copernicus journal article supplement (doi:10.5194/os-13-799-2017), 2017-09-26

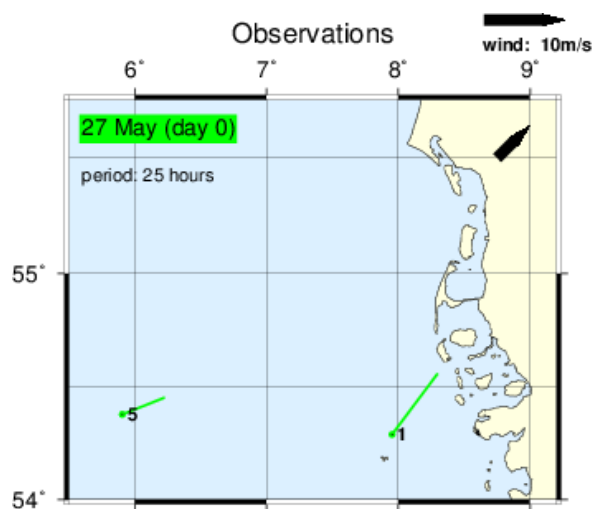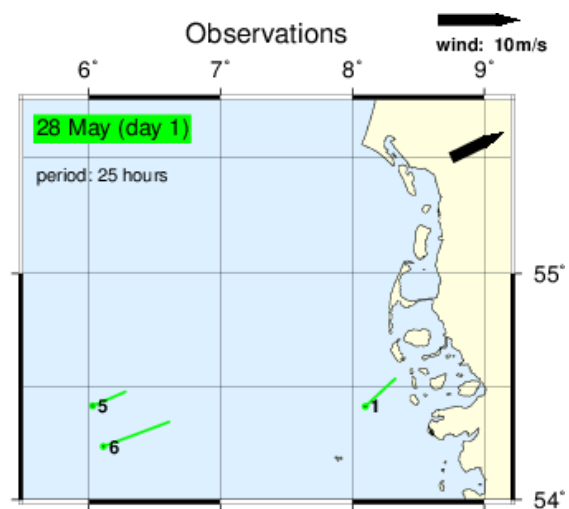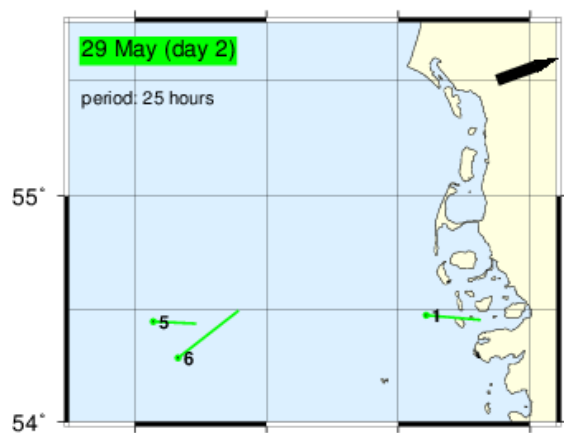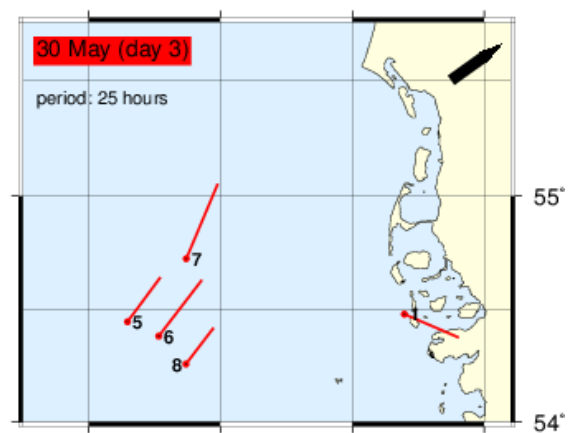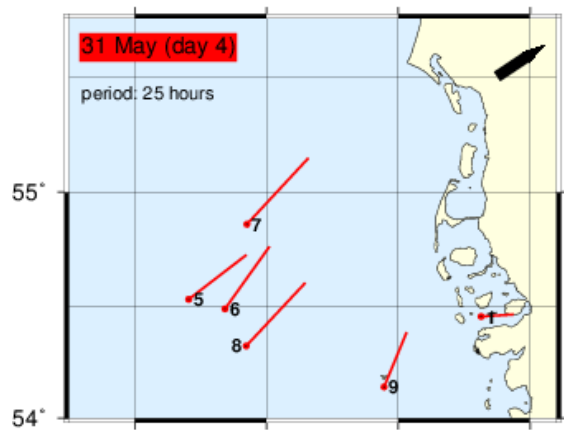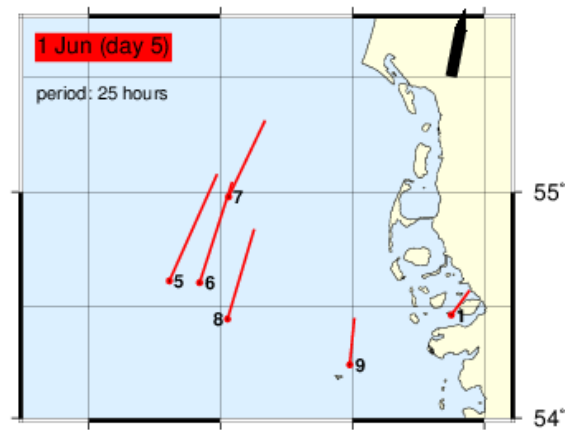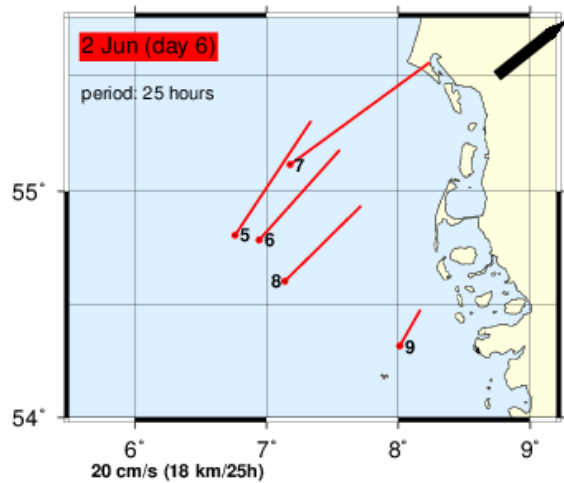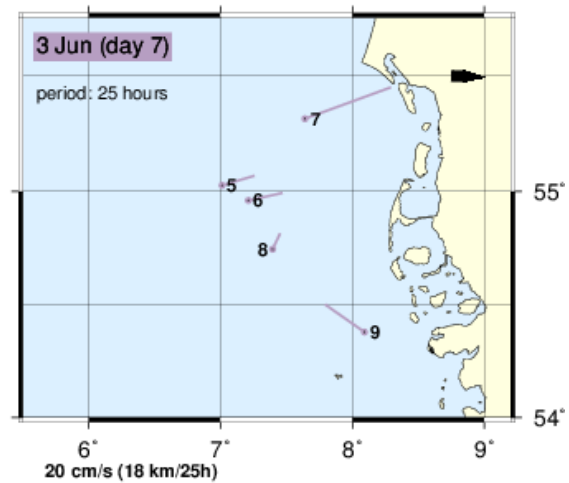

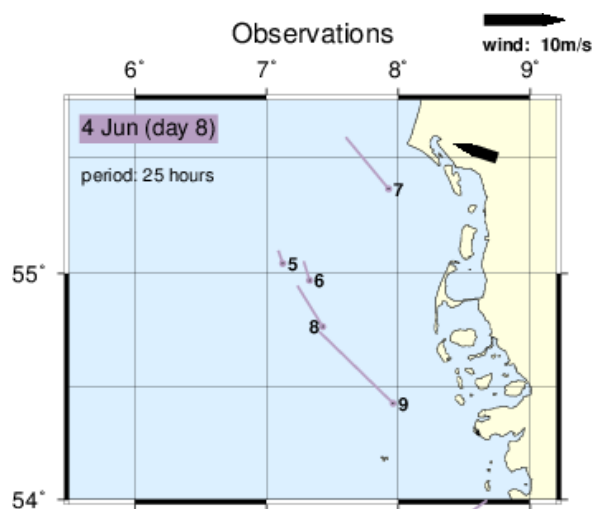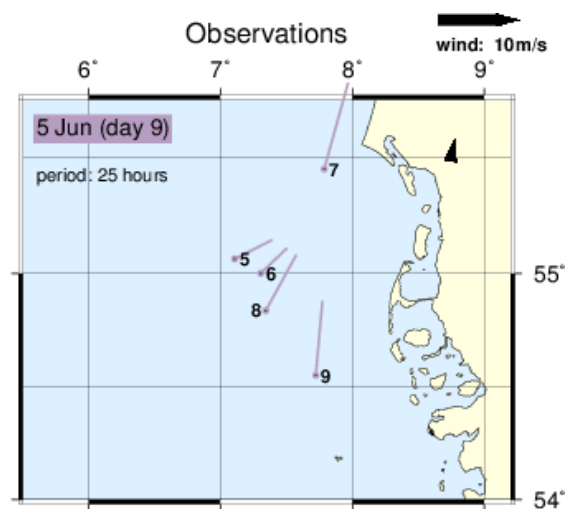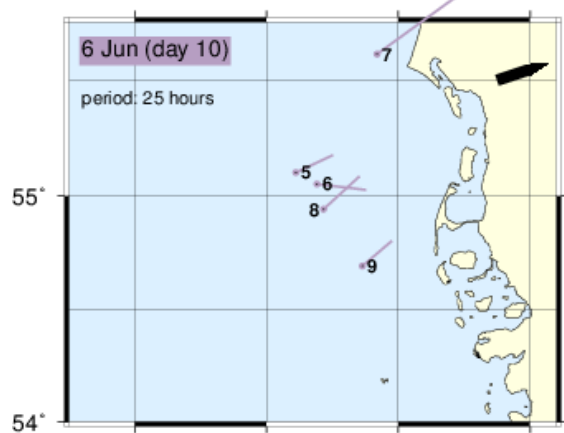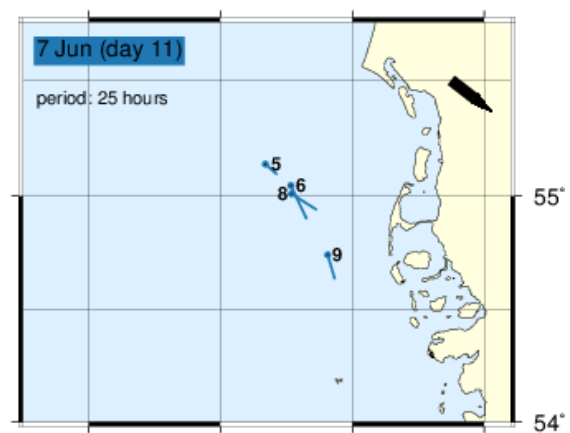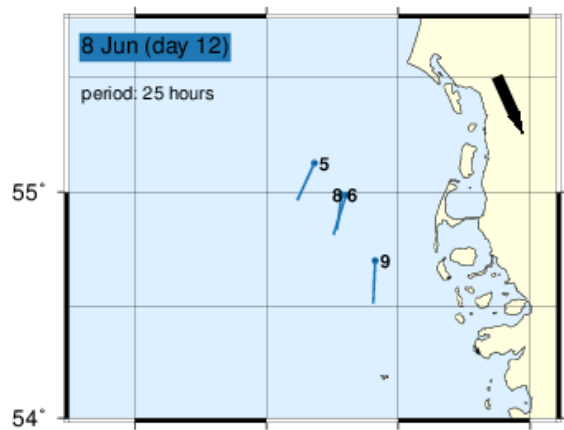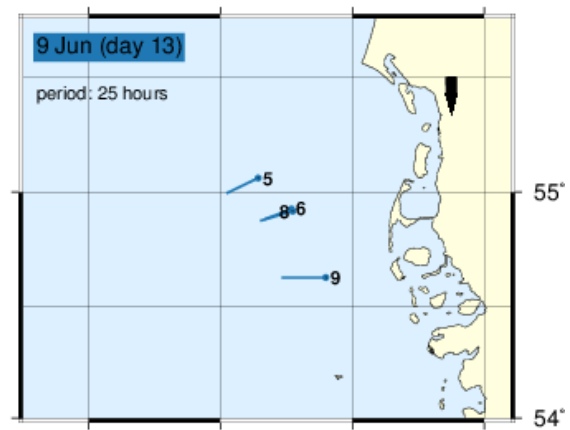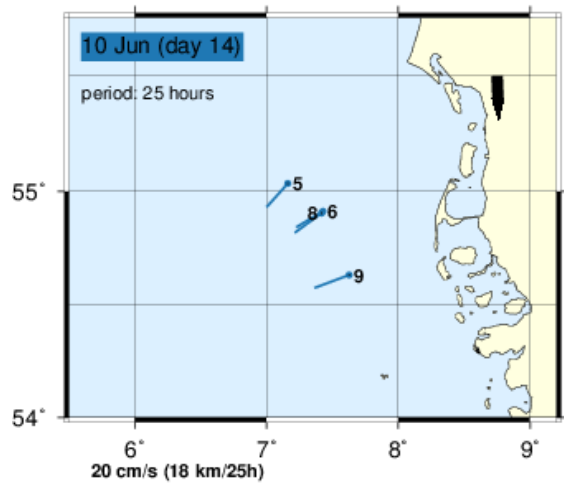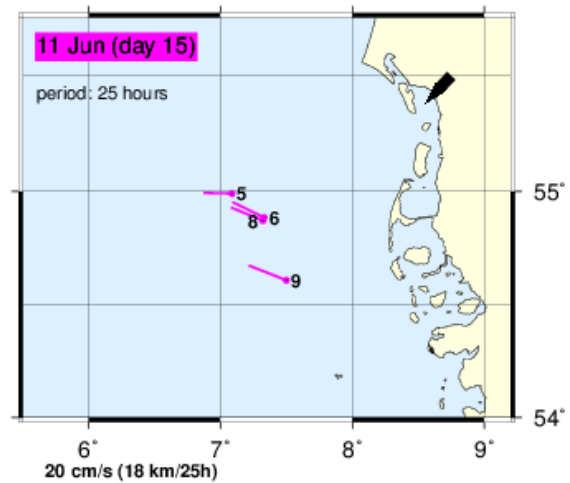

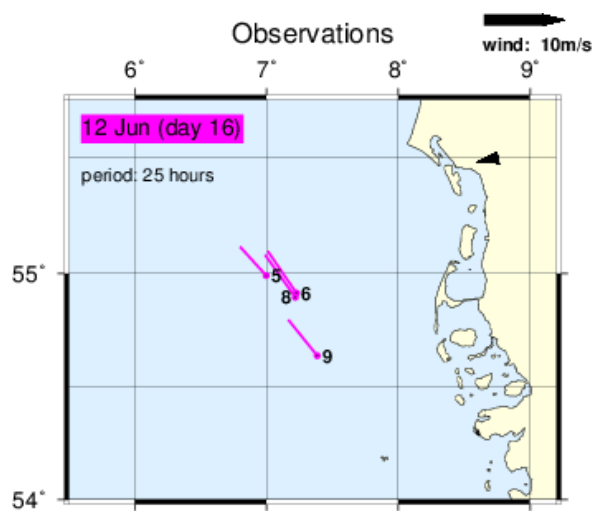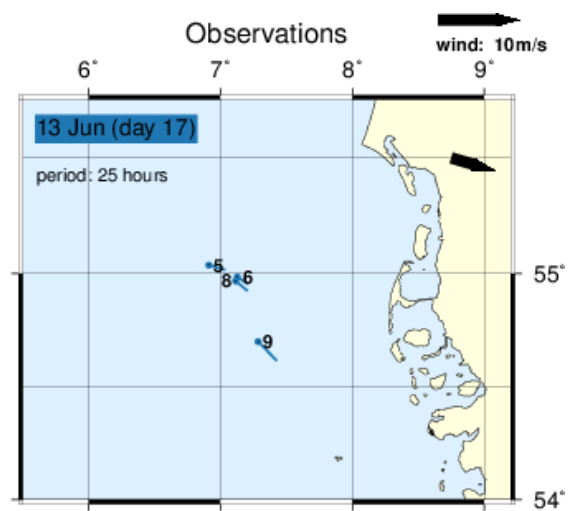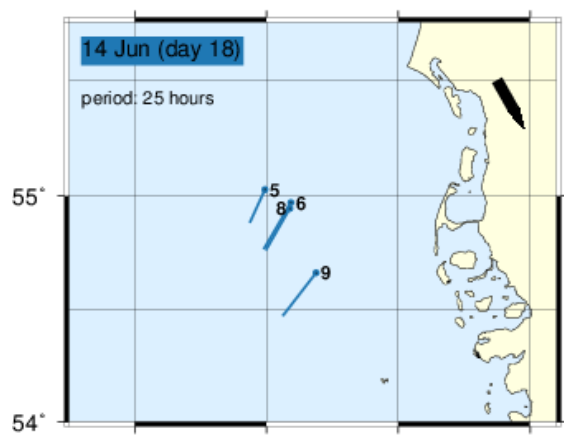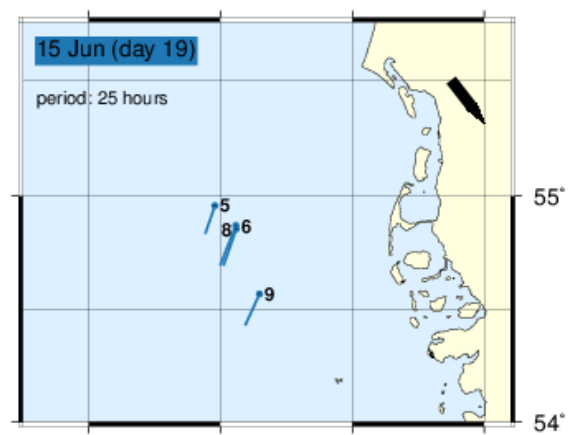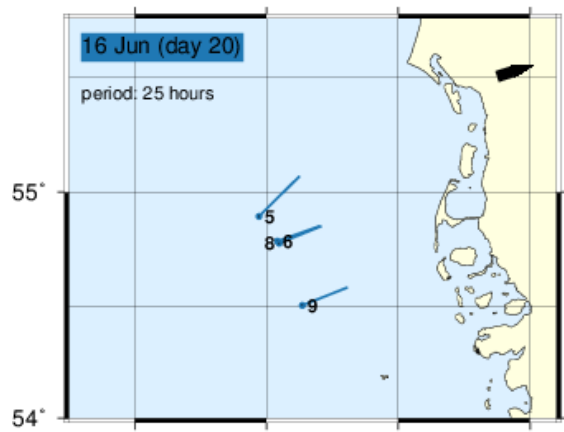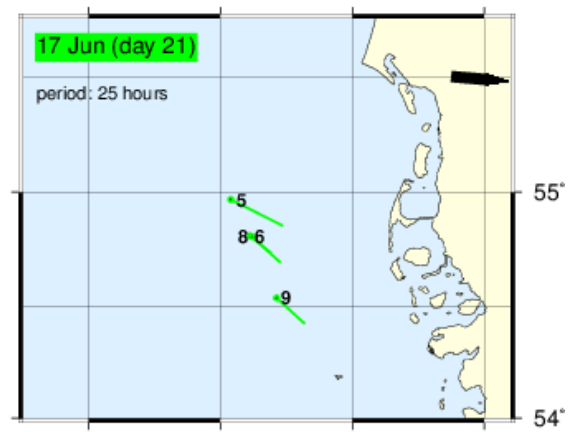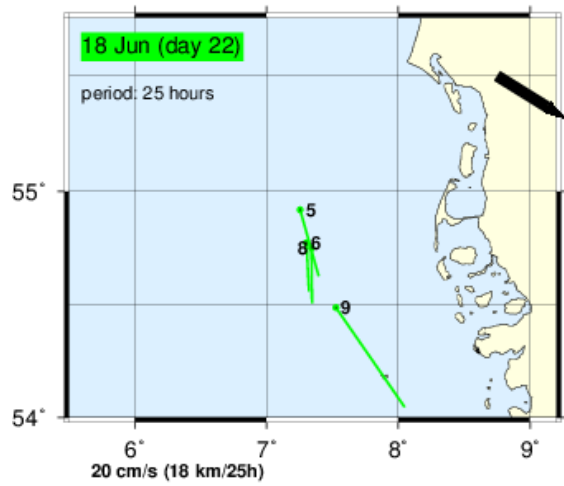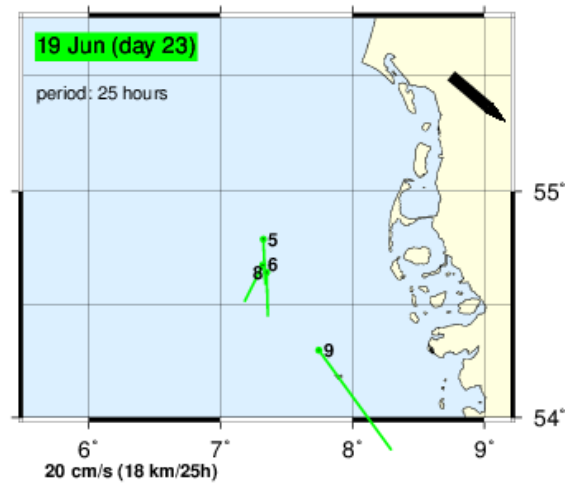

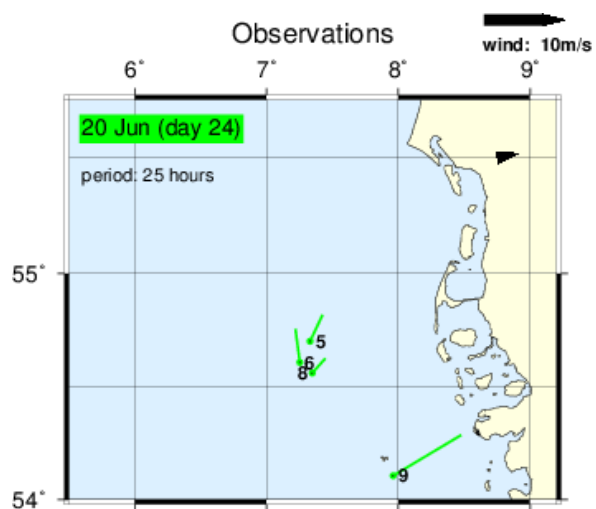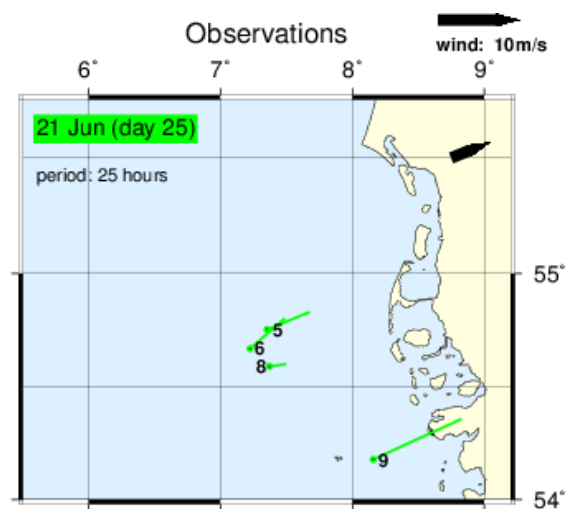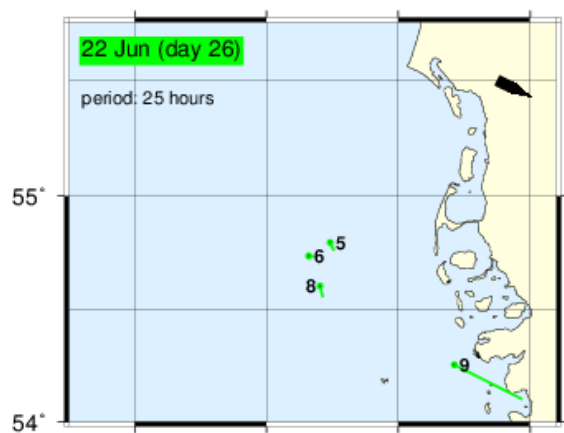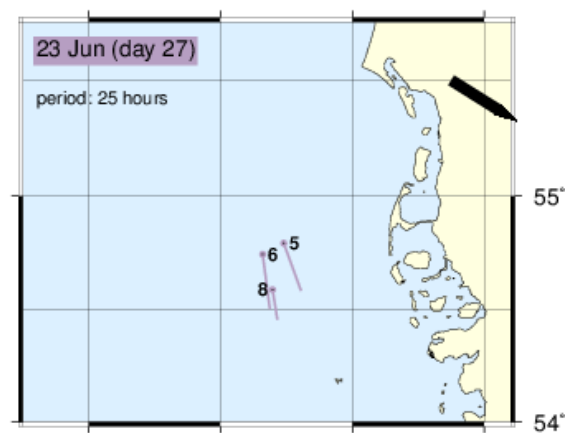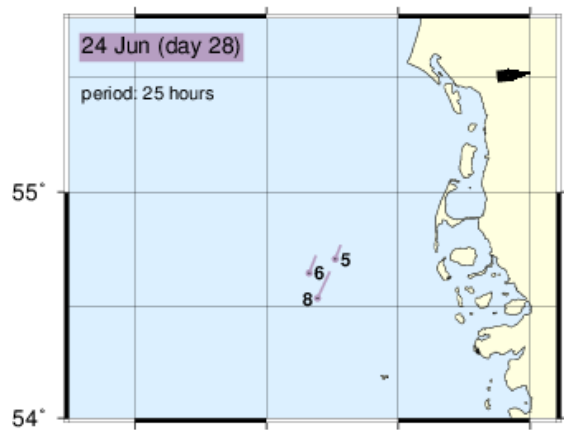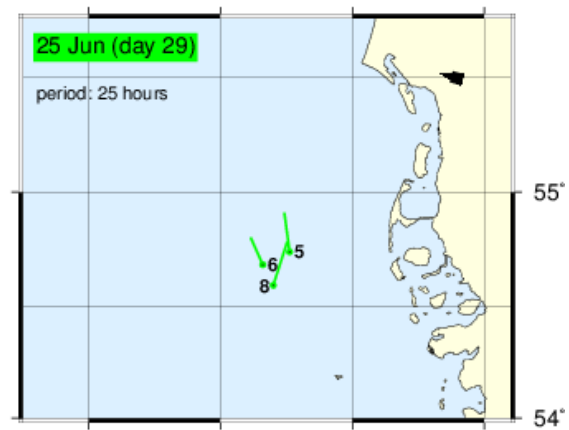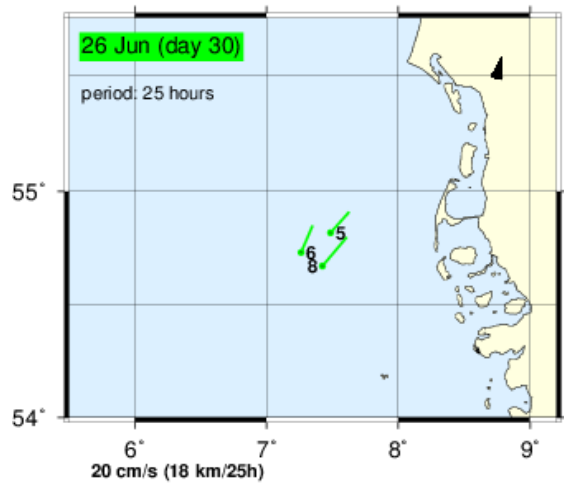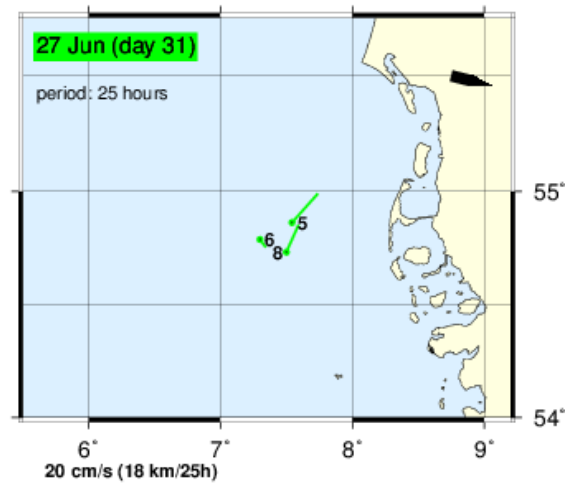

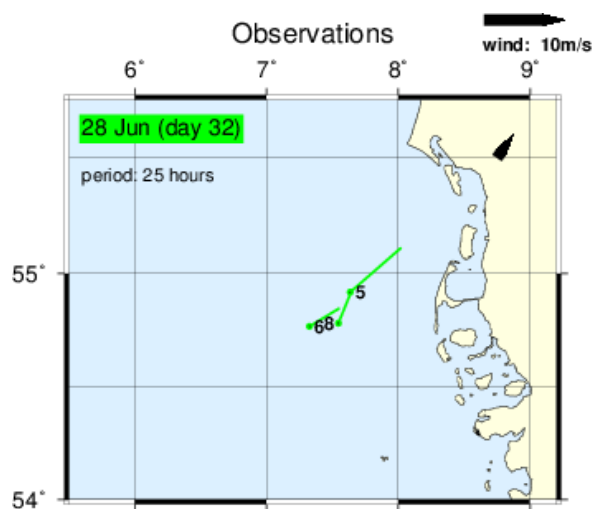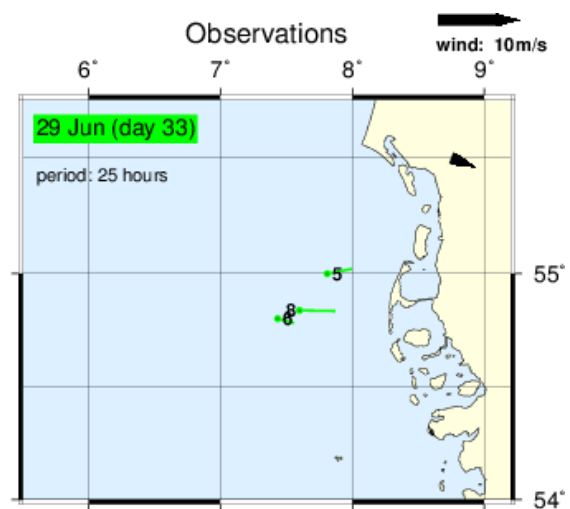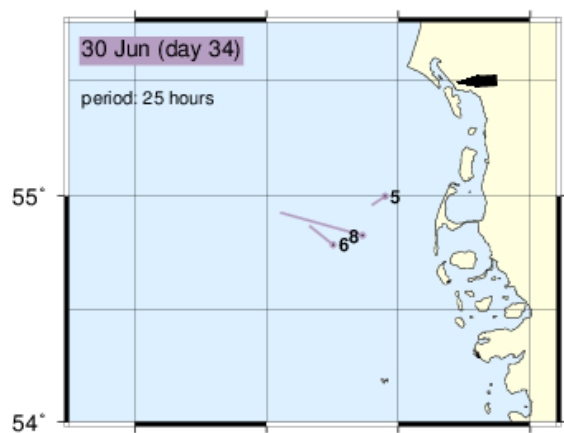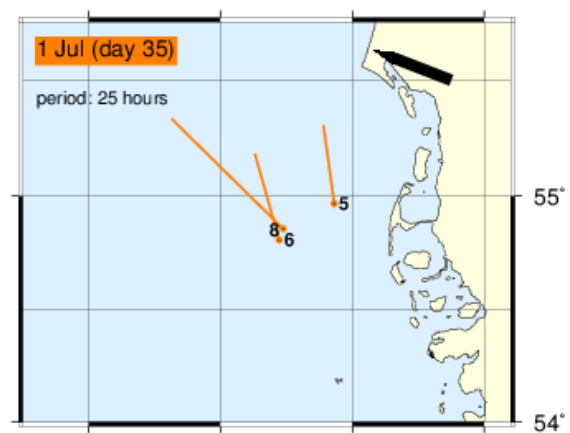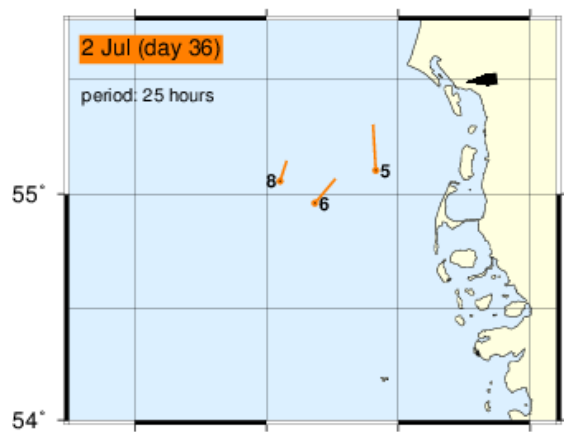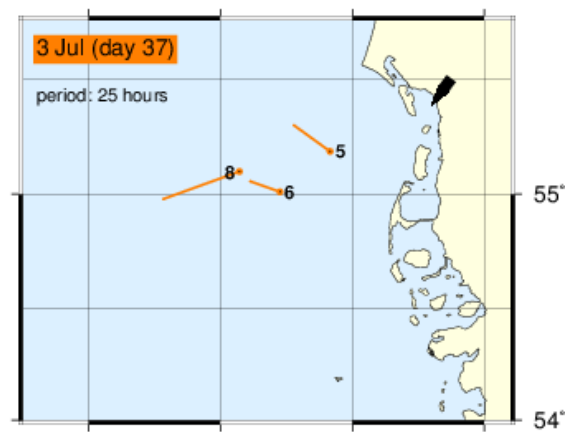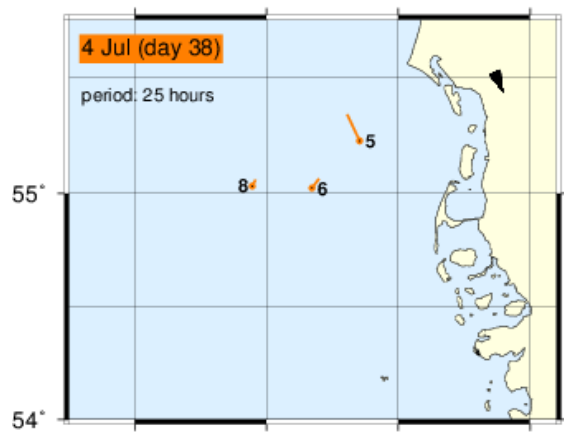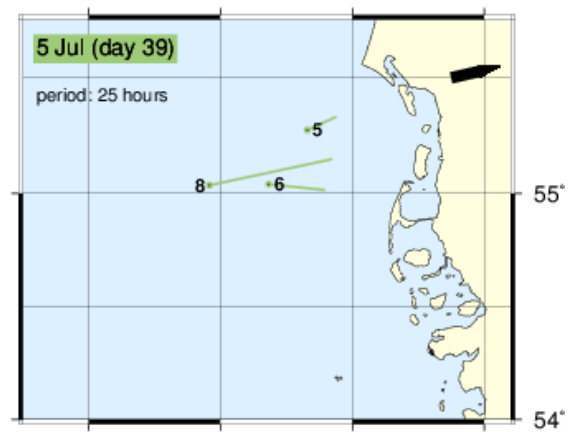

20 cm/s (18 km/25h)

20 cm/s (18 km/25h)

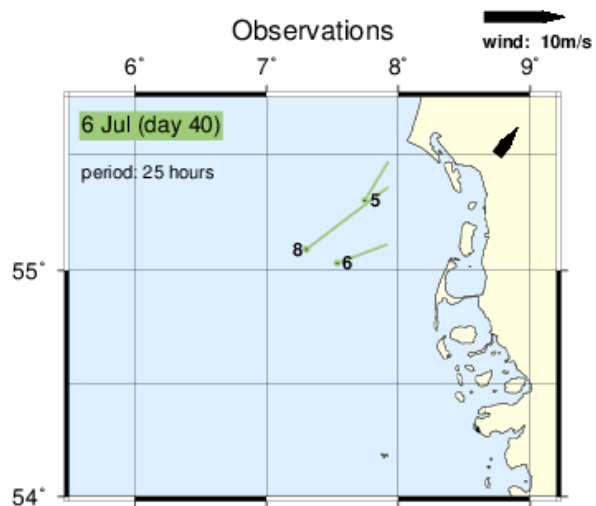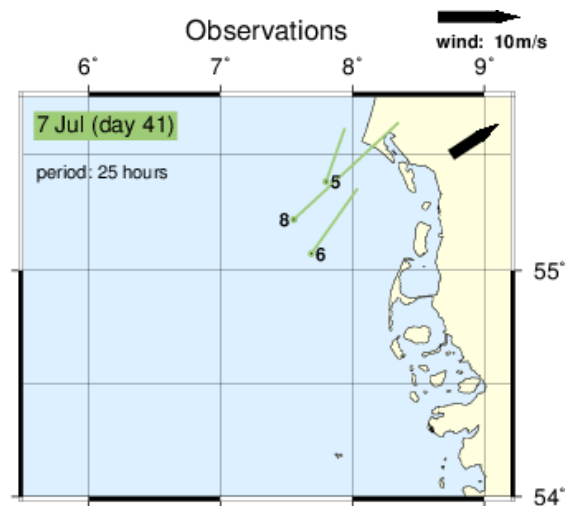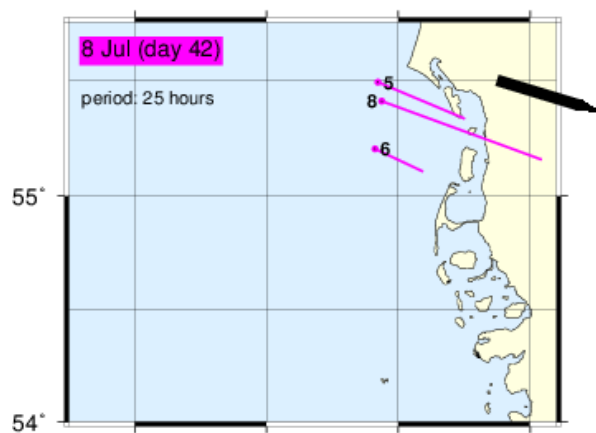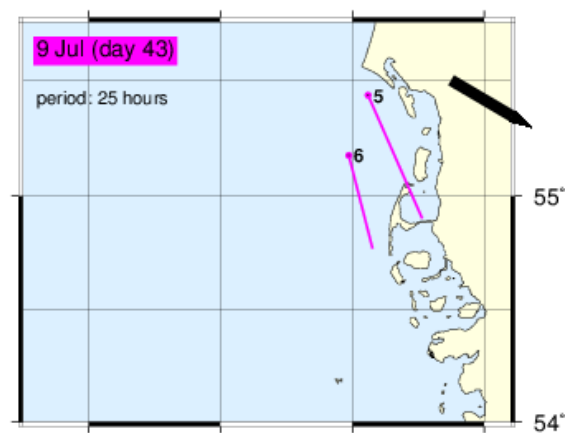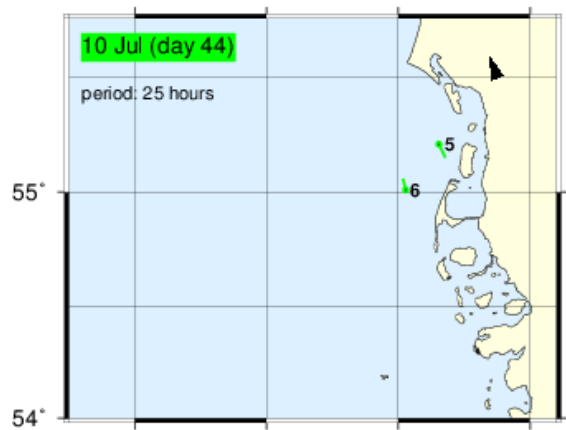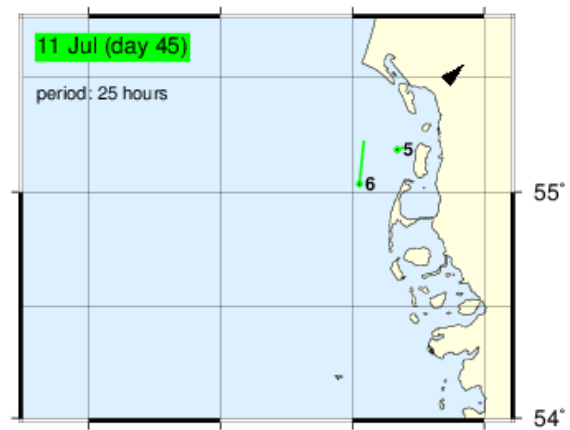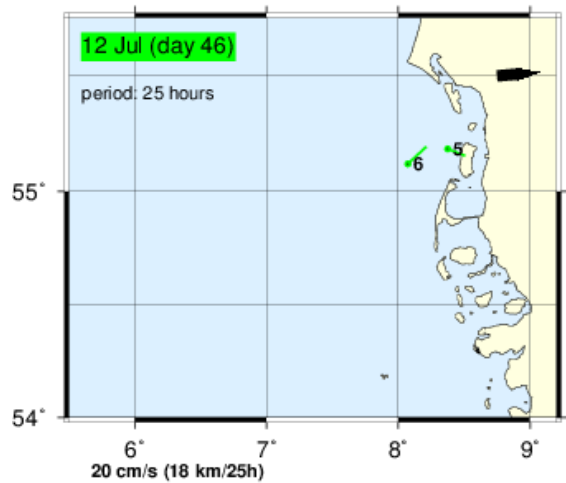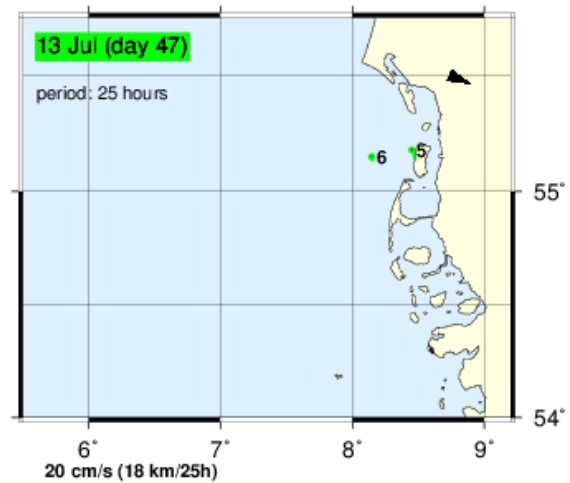

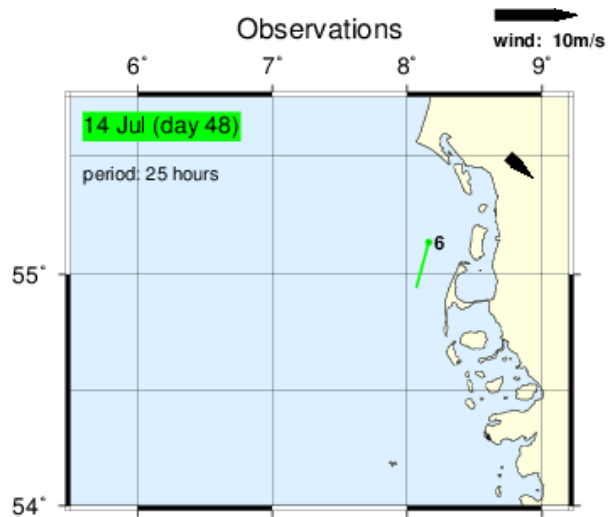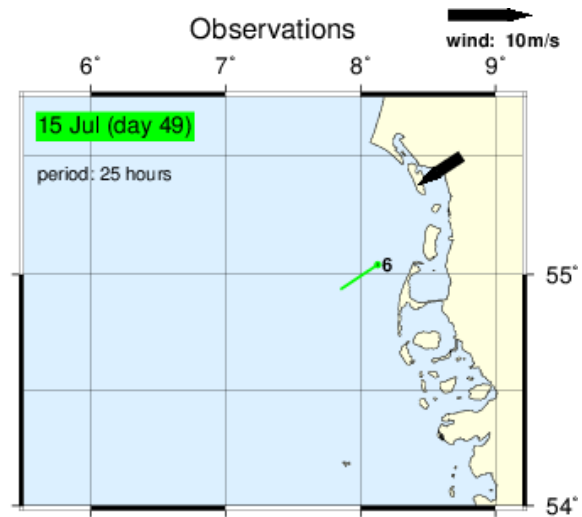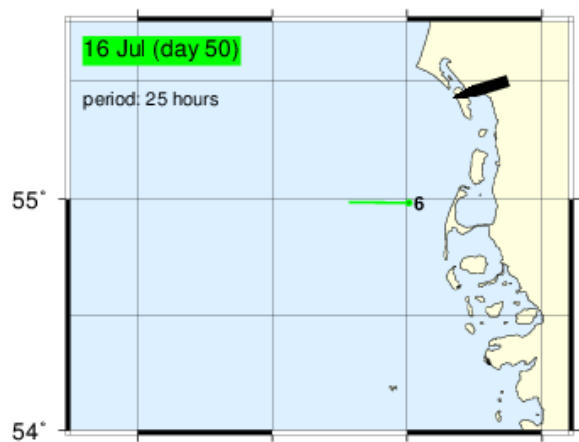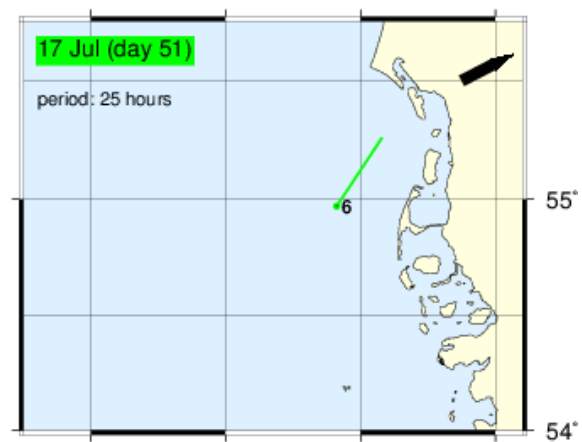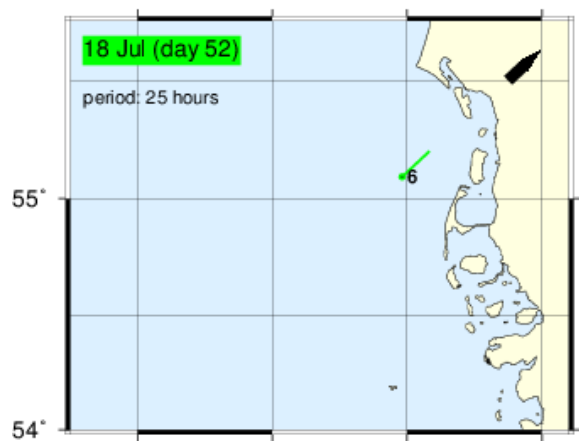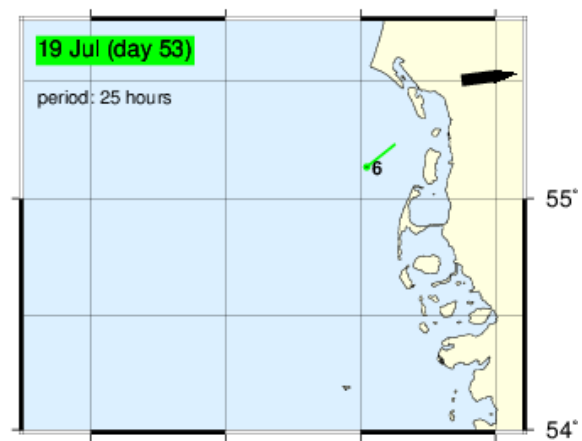

Supplement: Supplementary file 1 [file os-13-799-2017-supplement.zip]

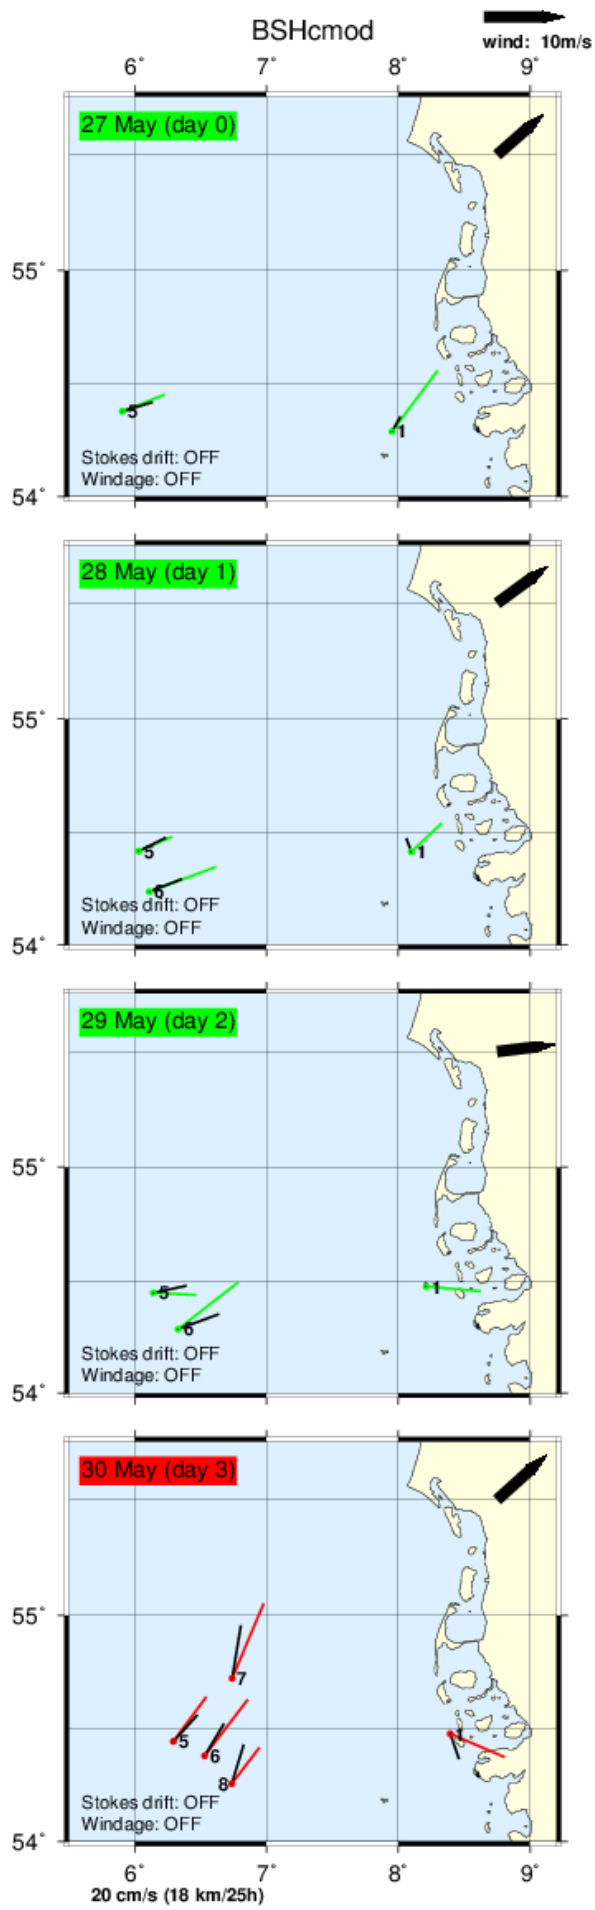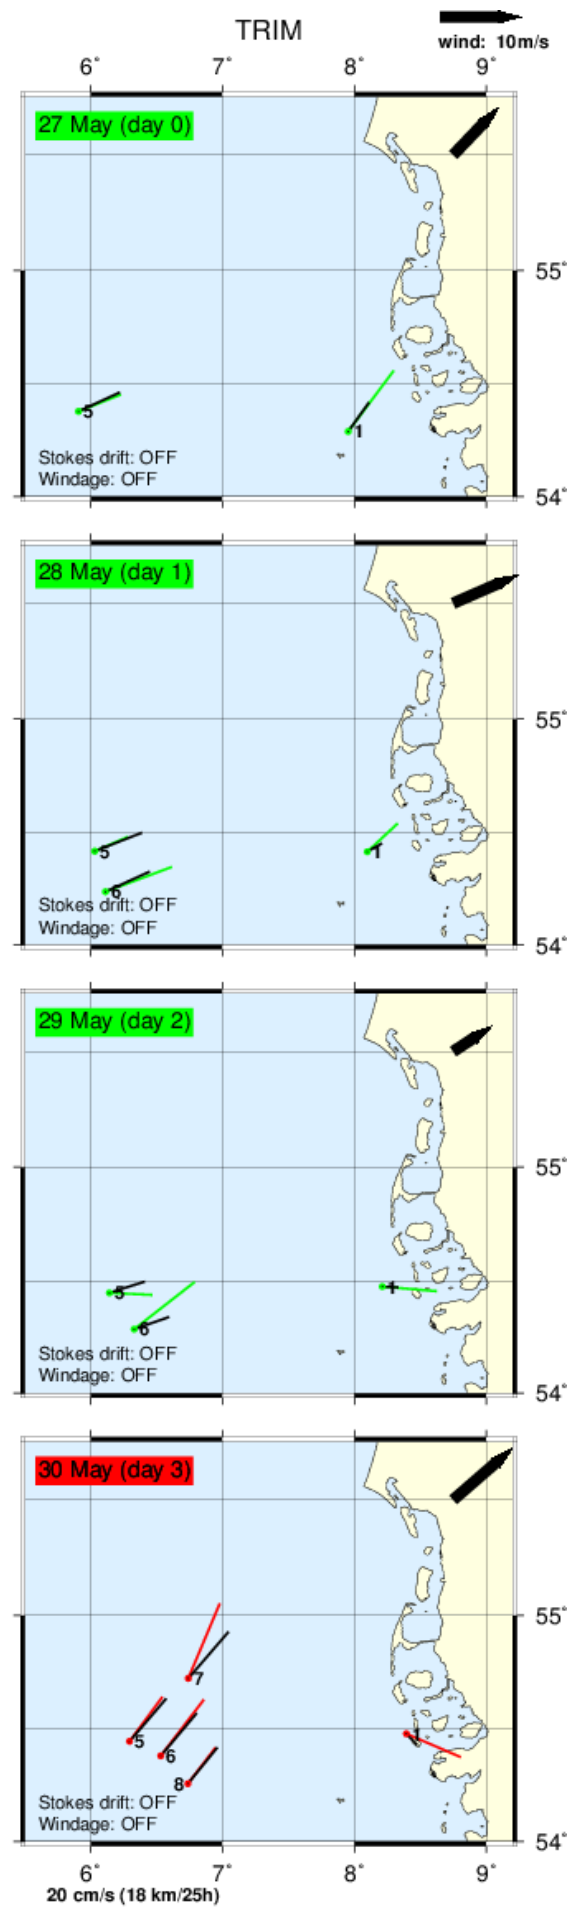

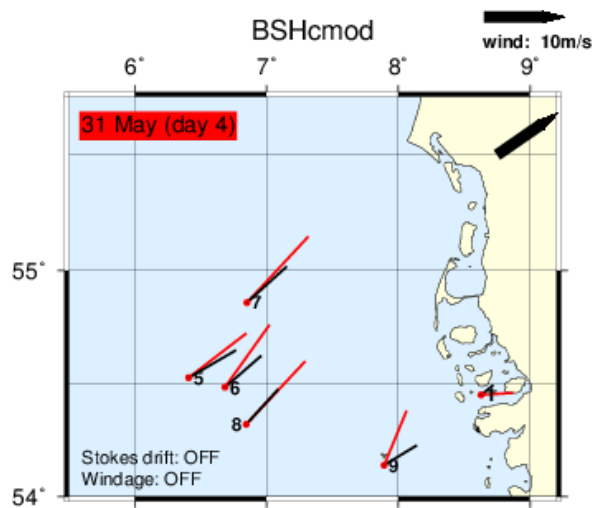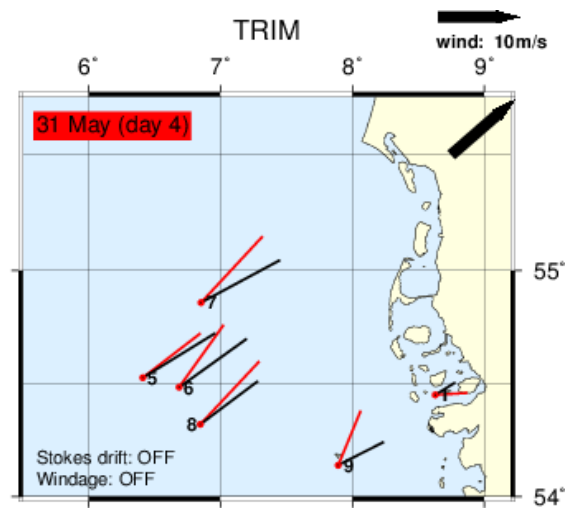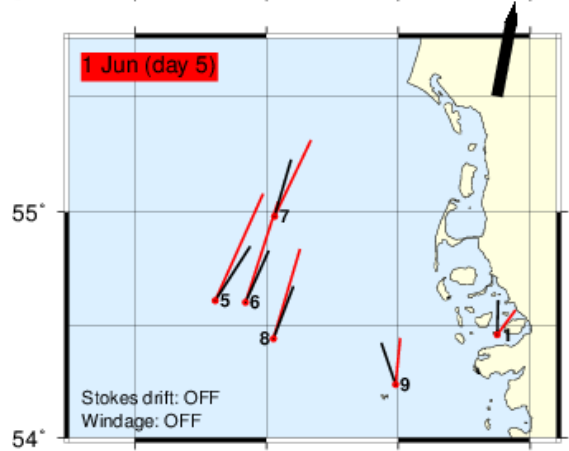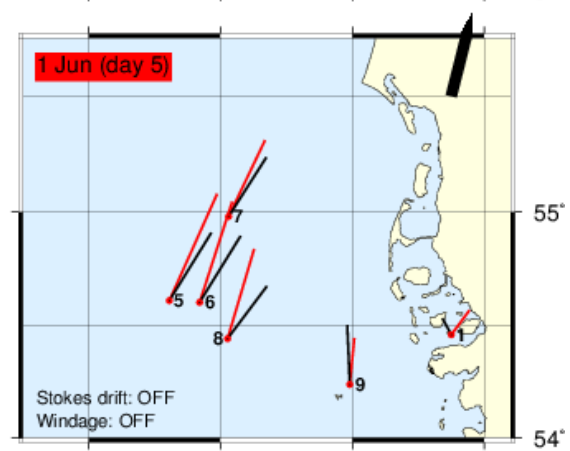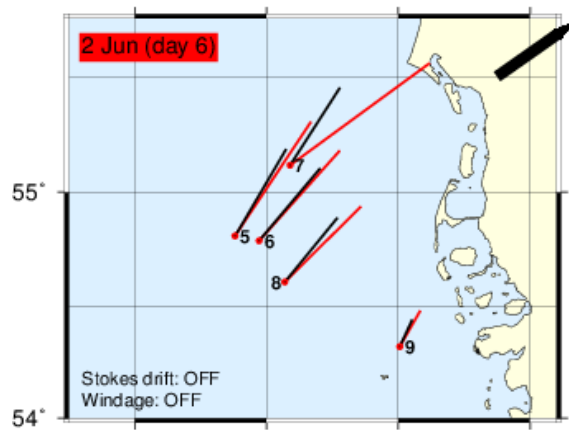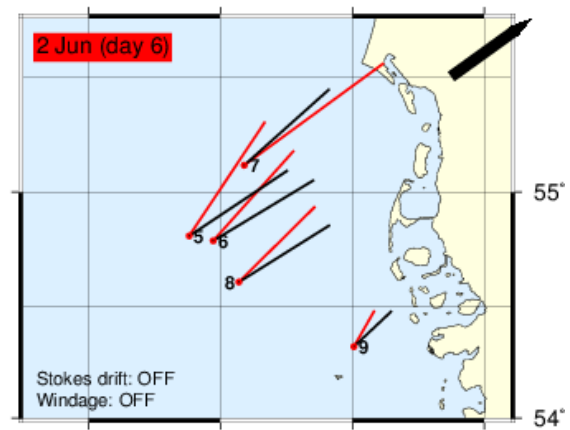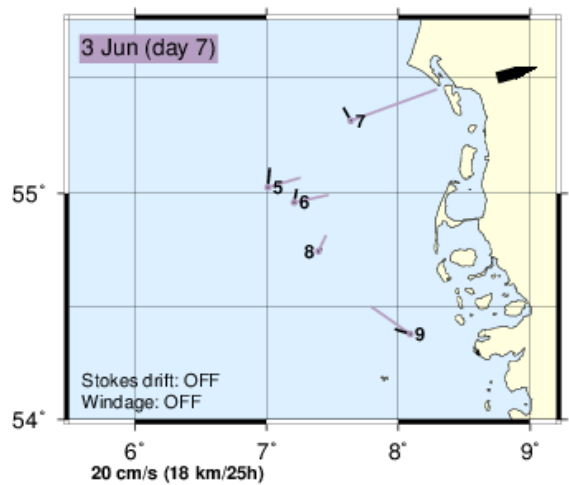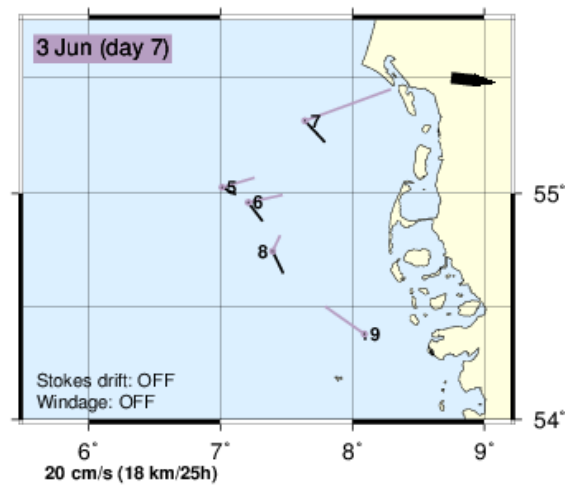

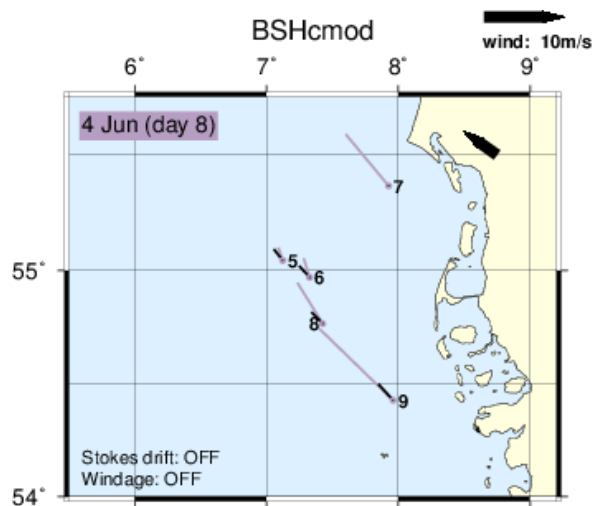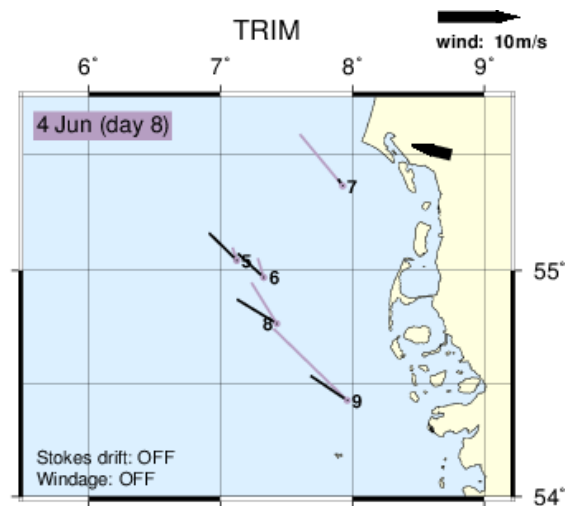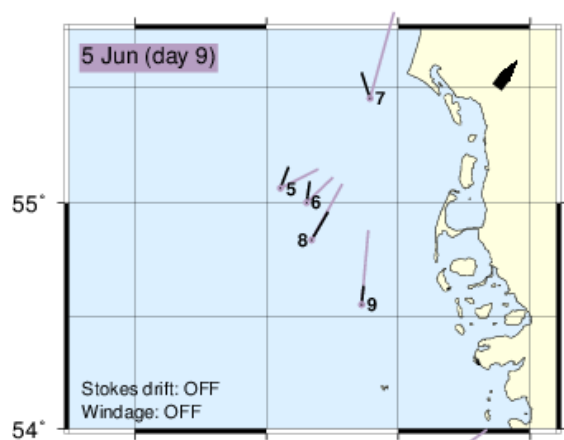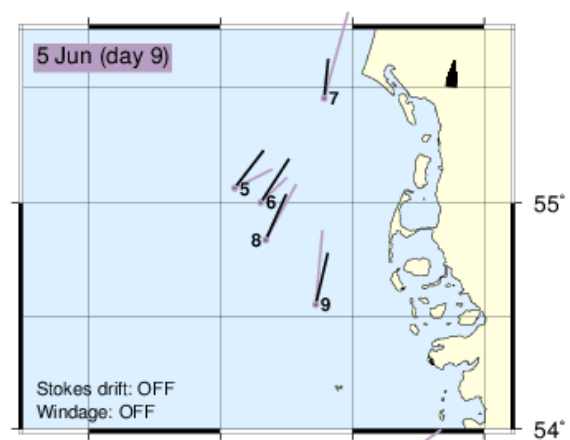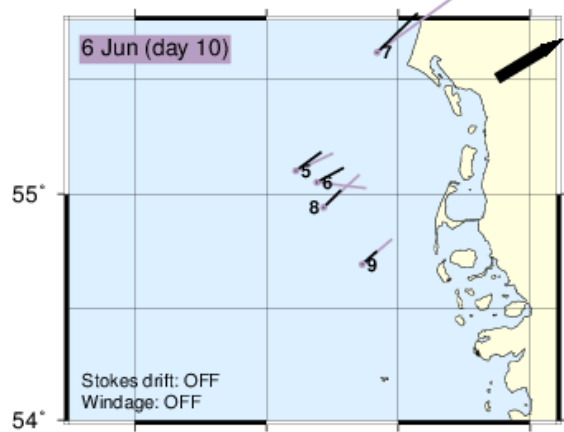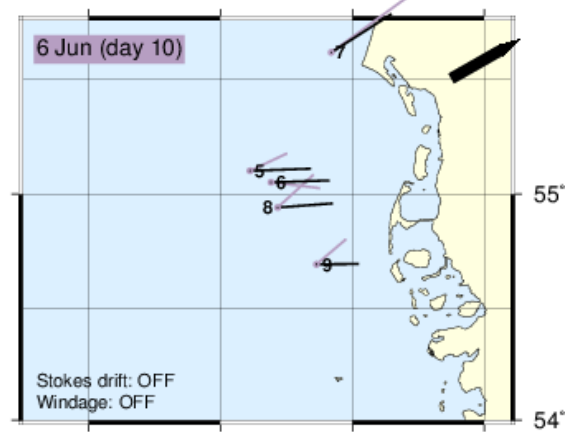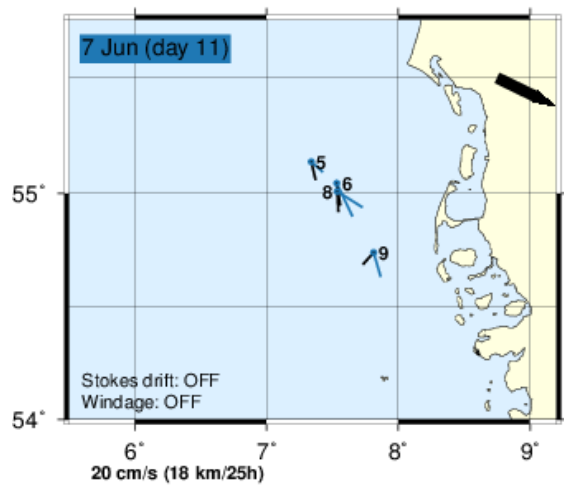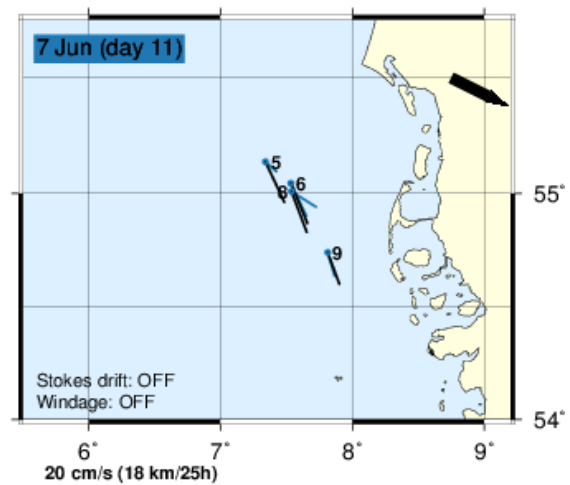

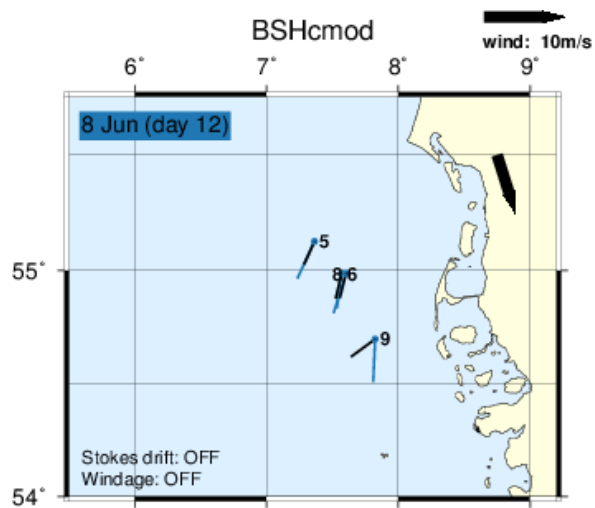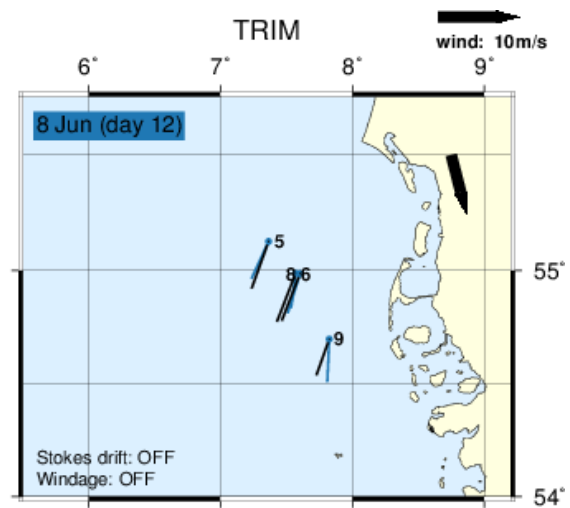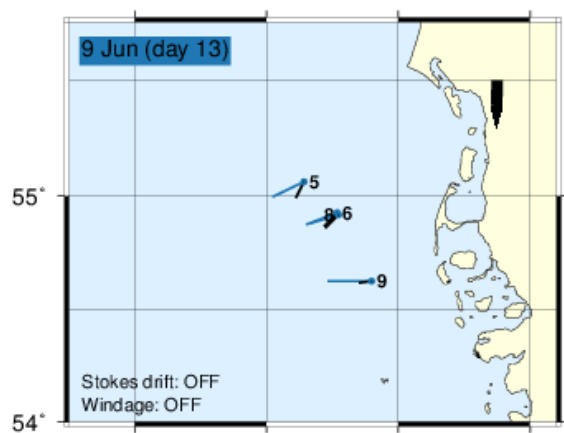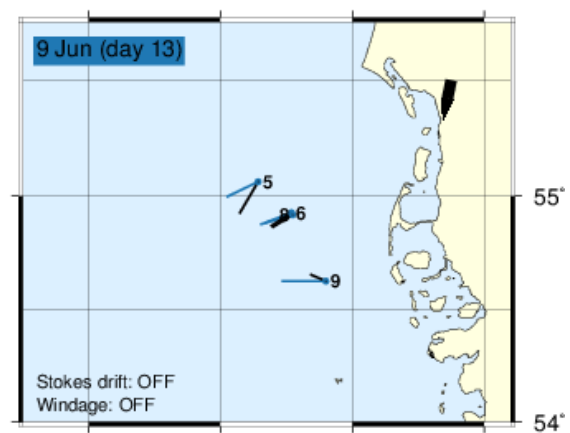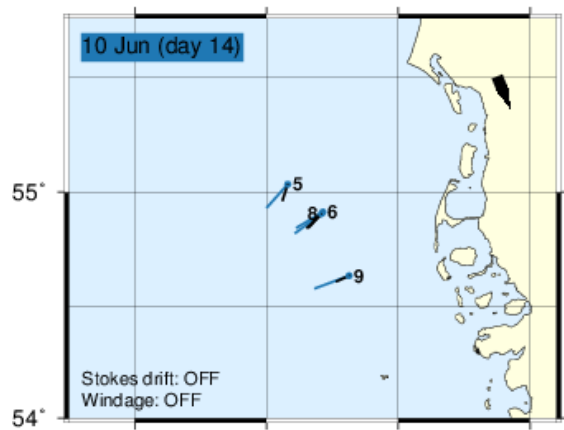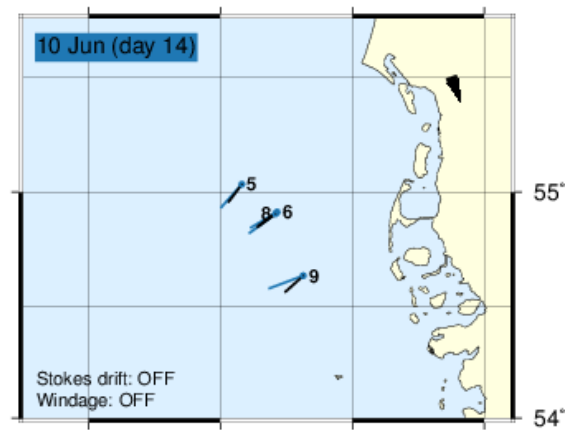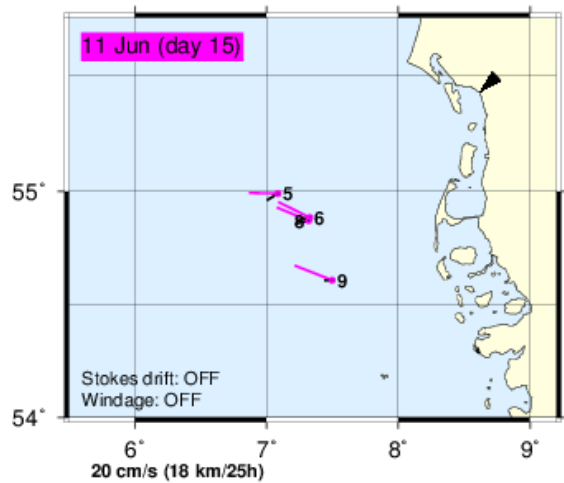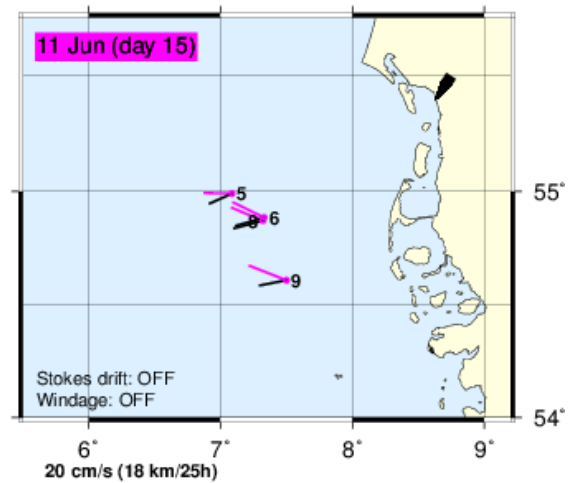

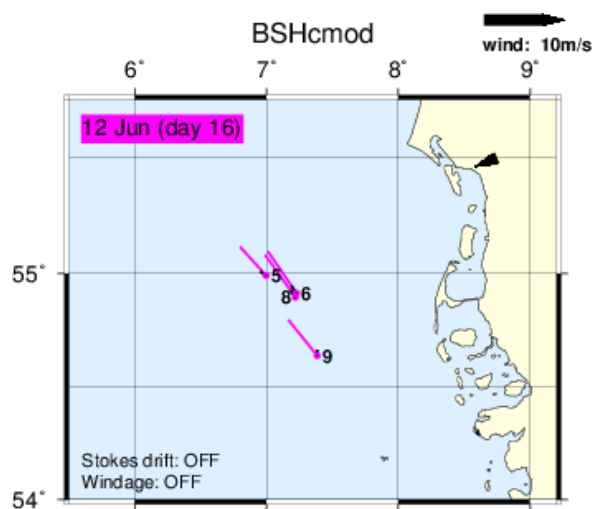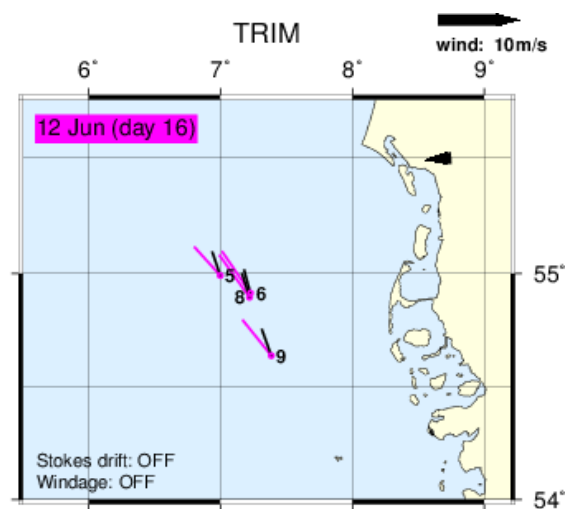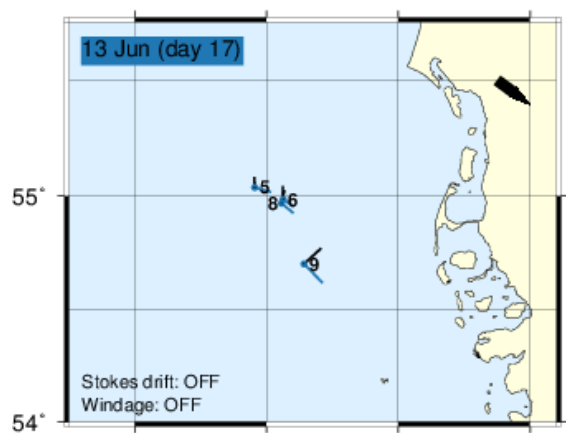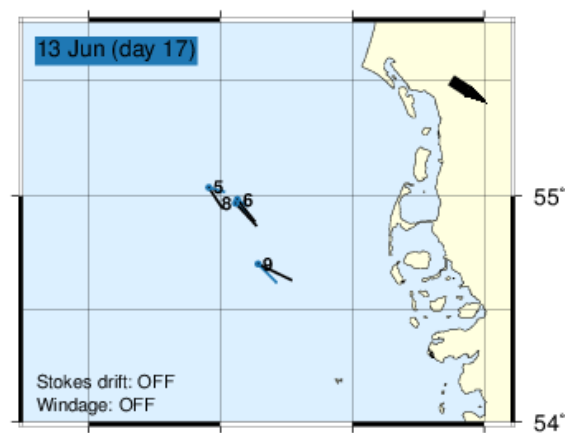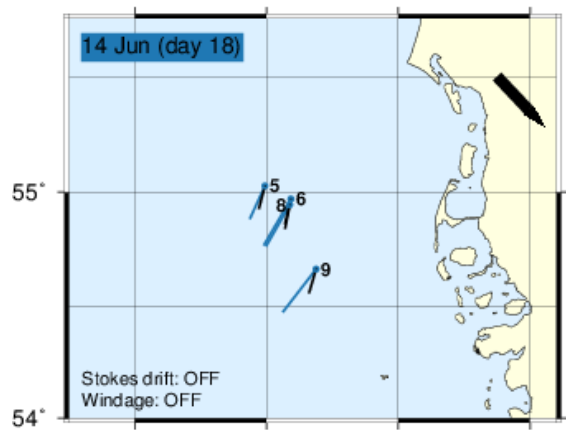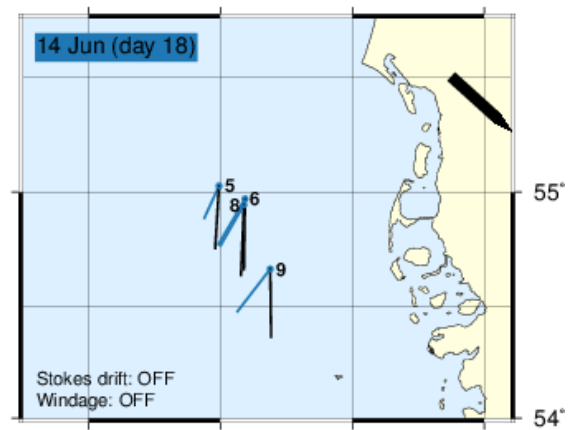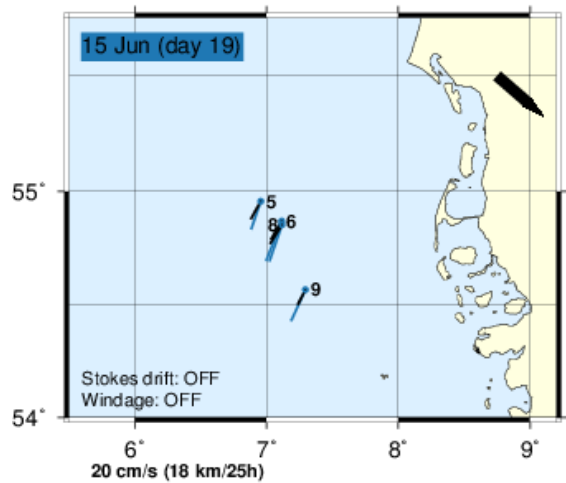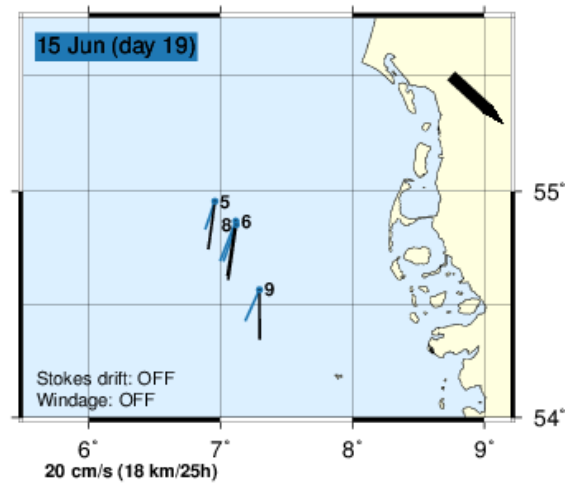

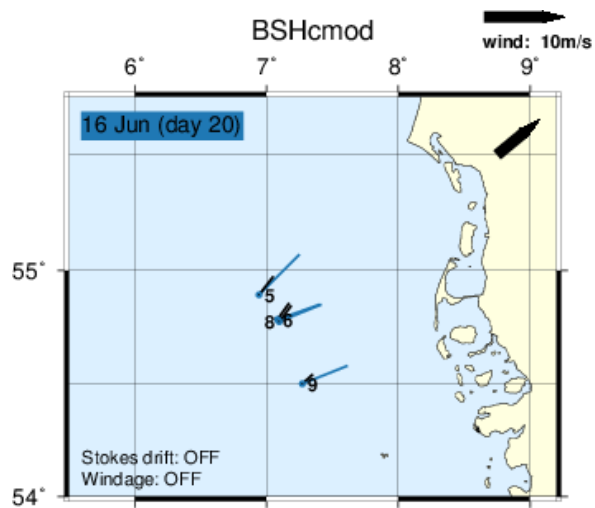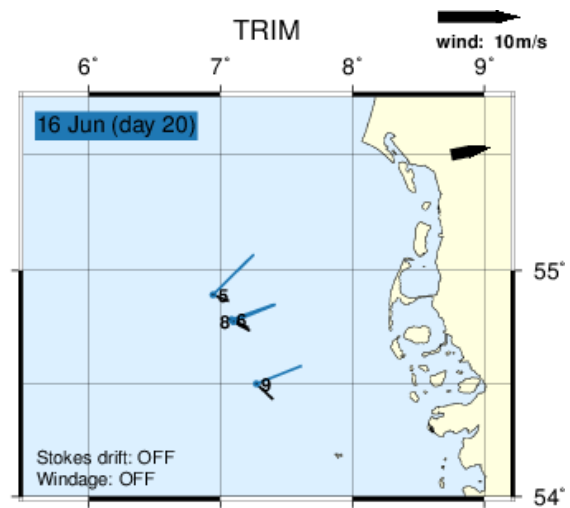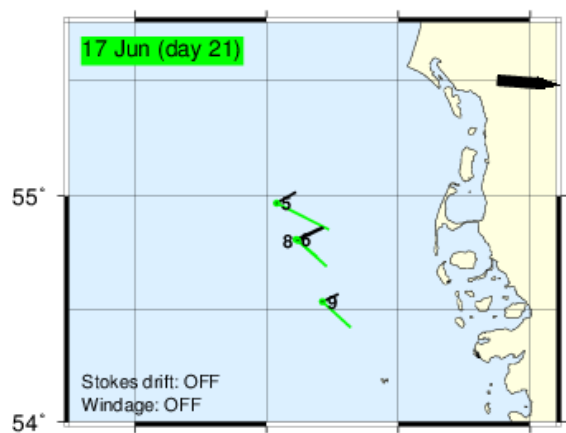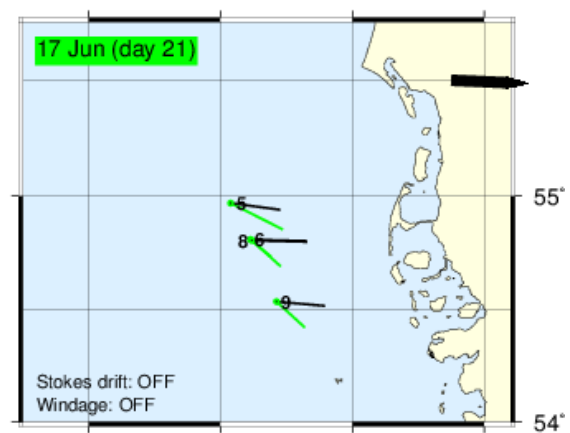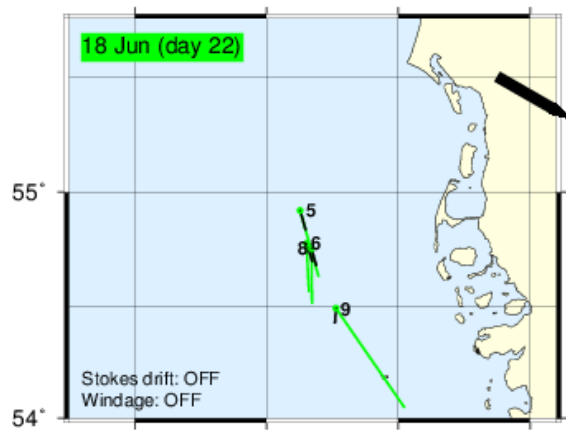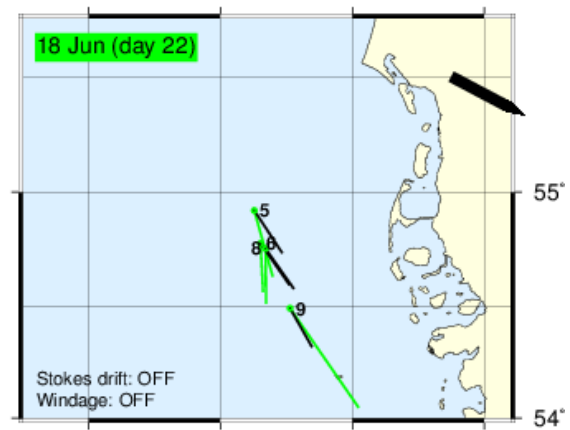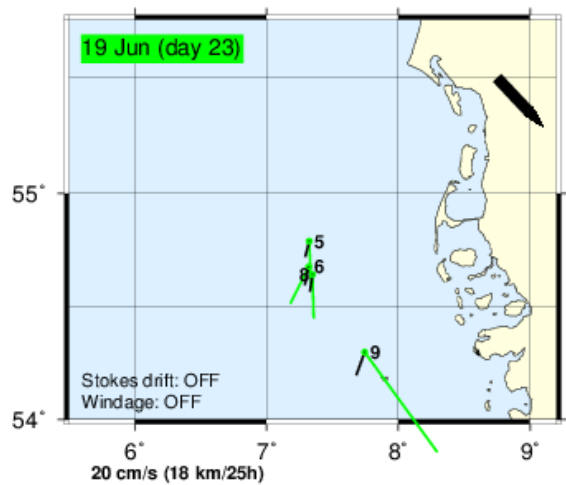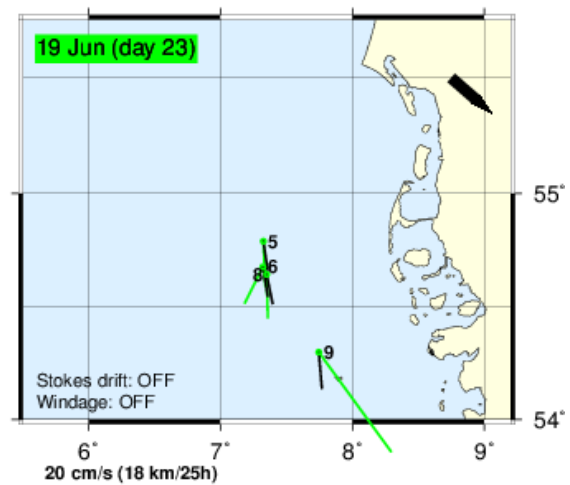

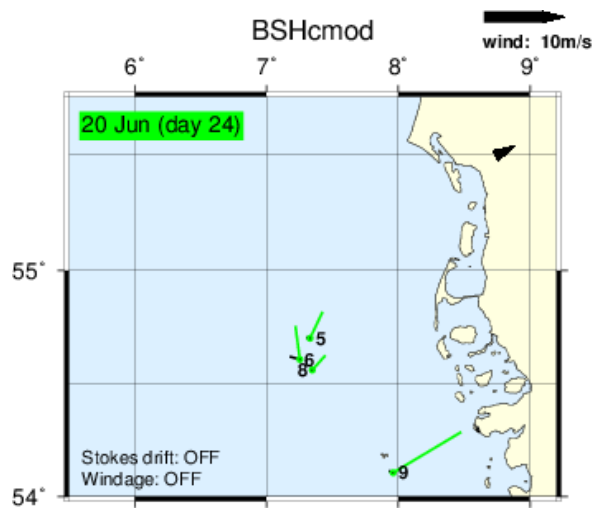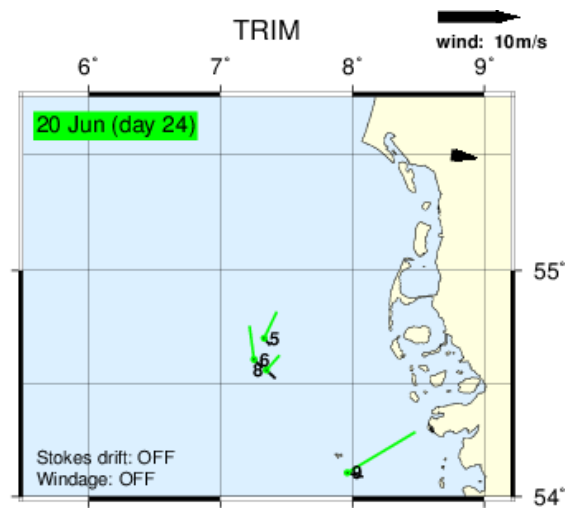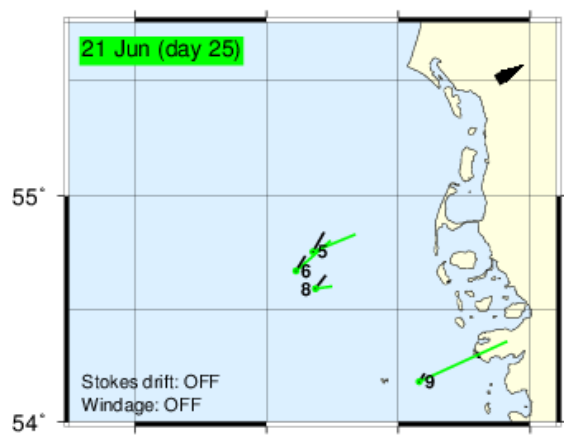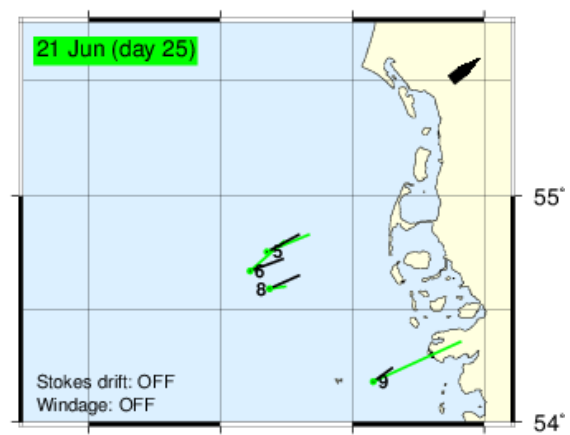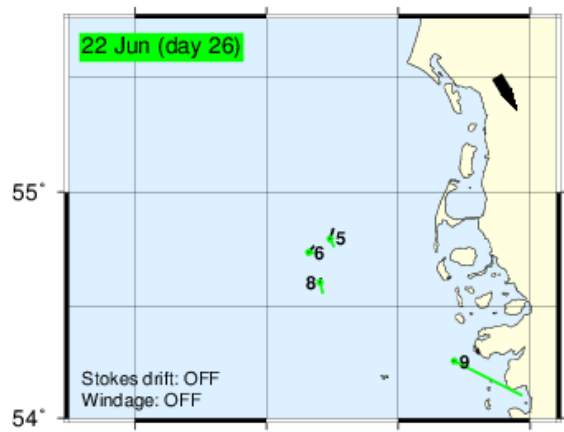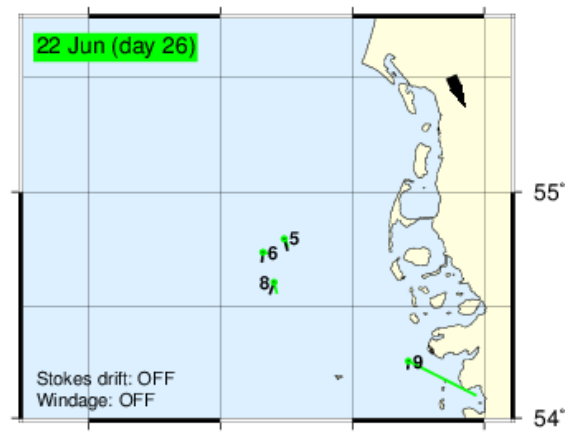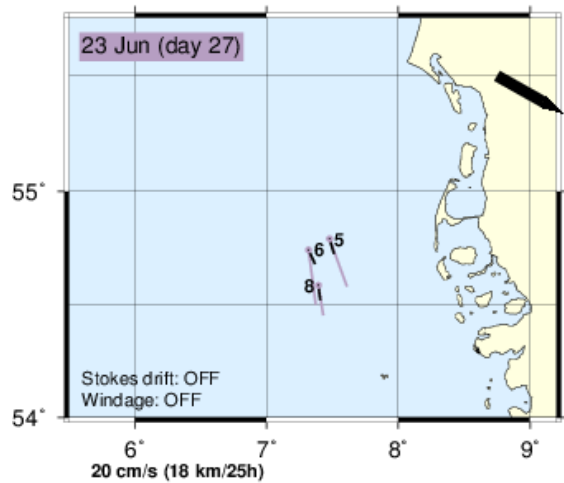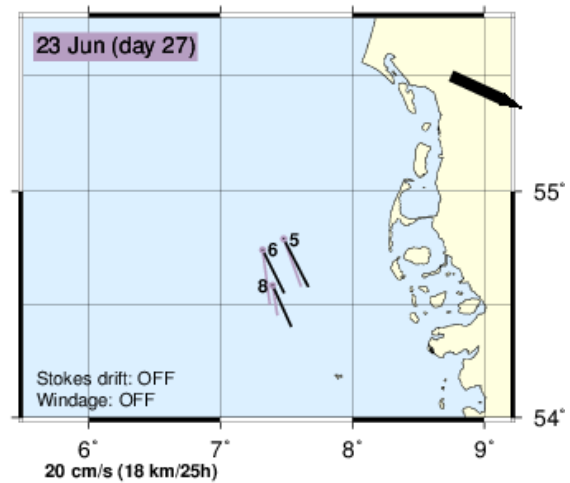

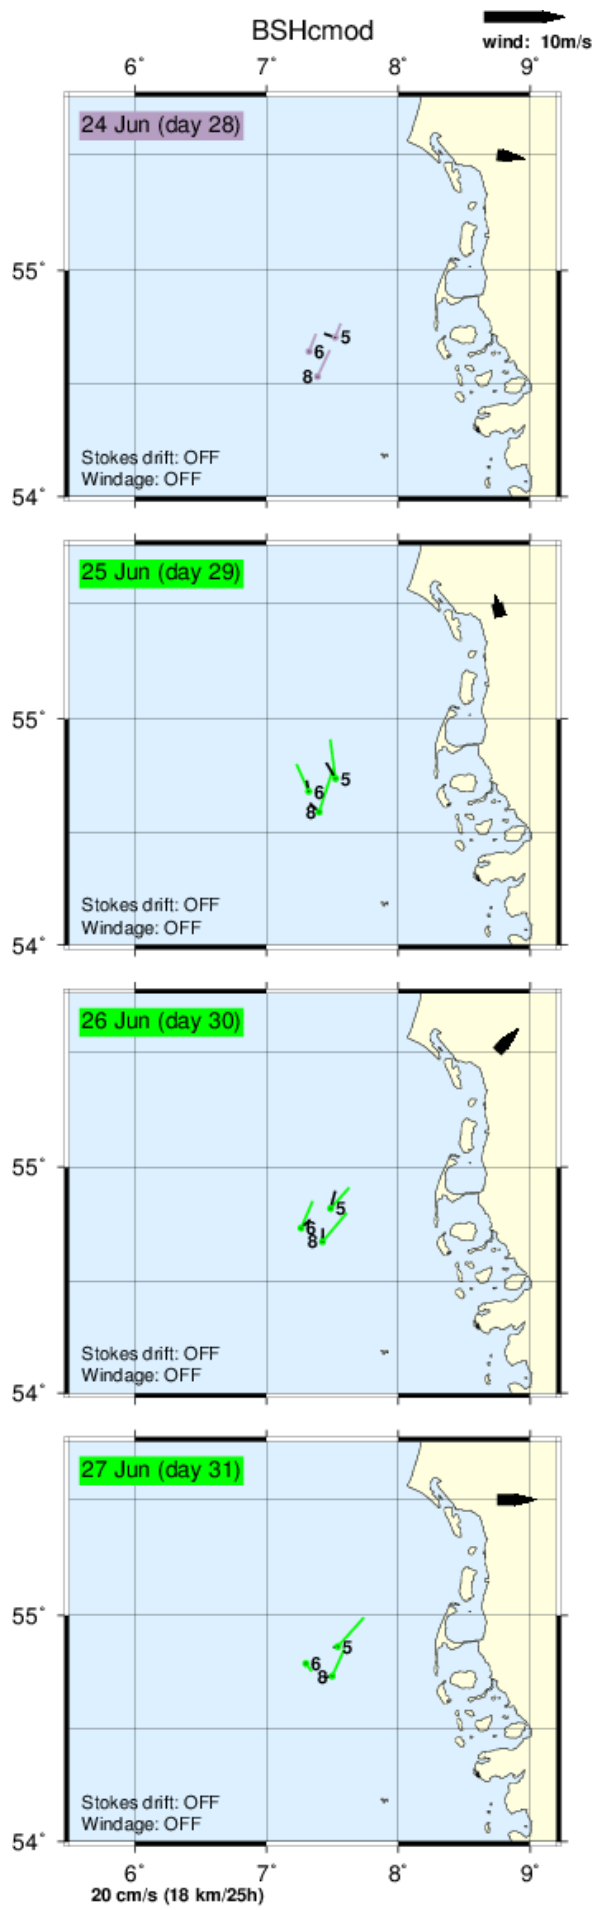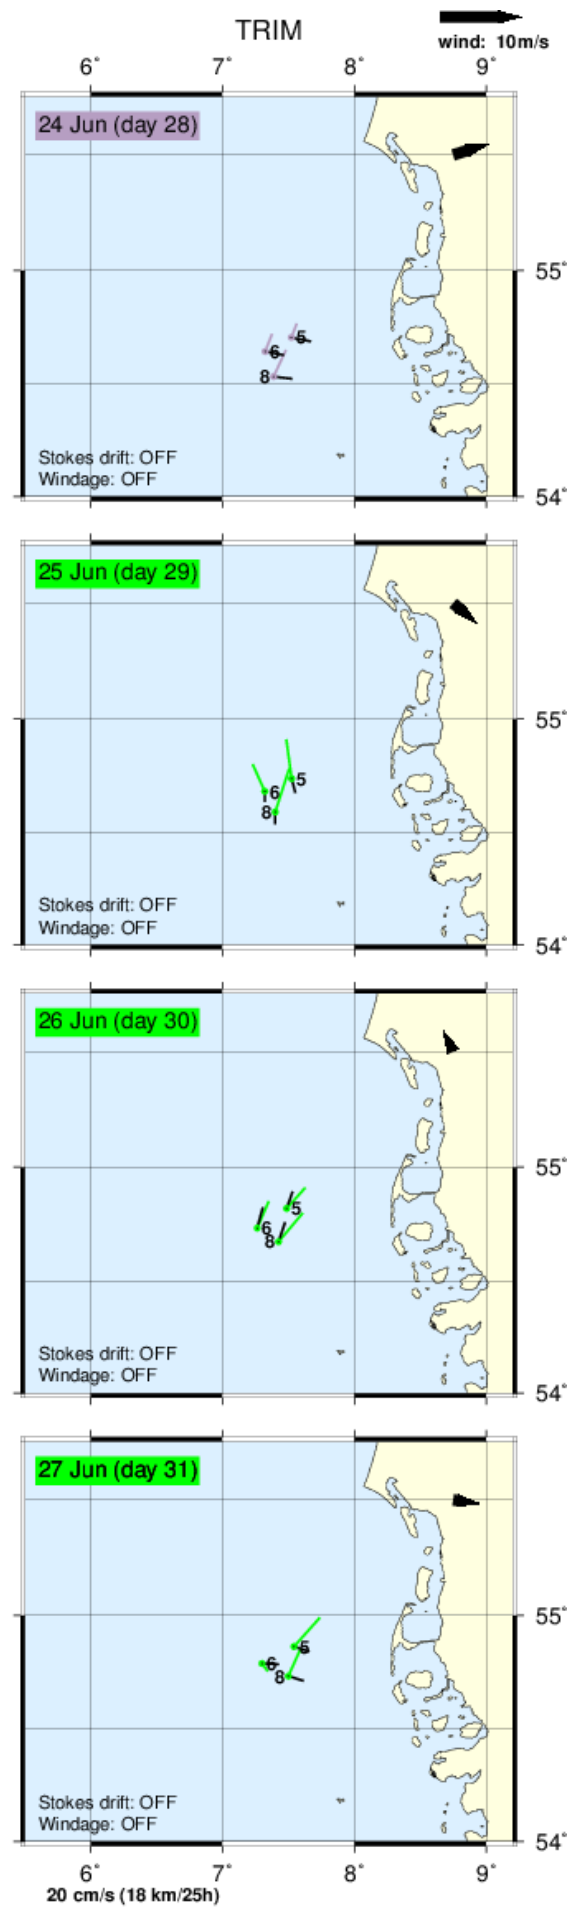



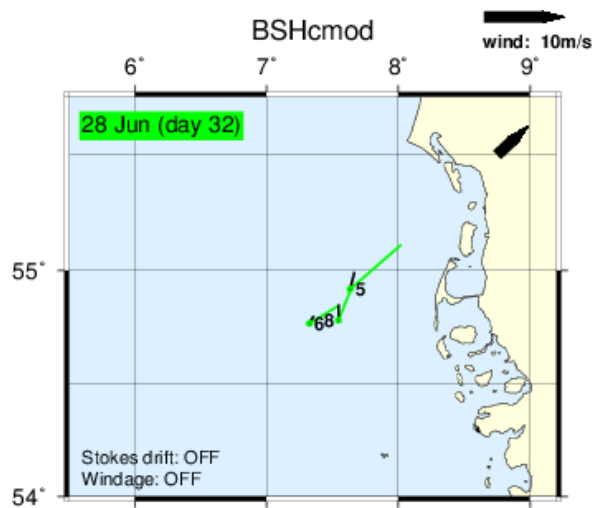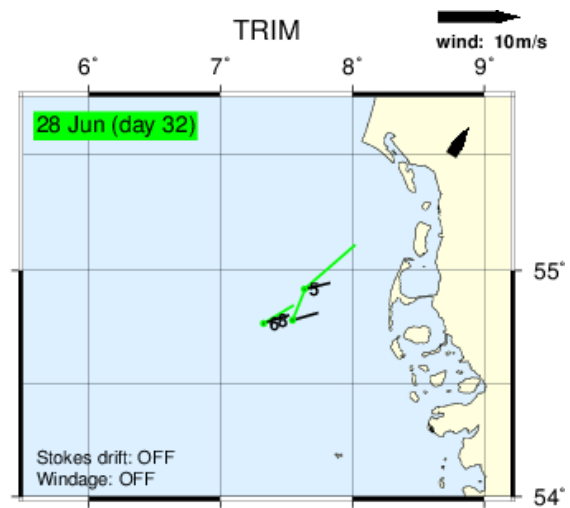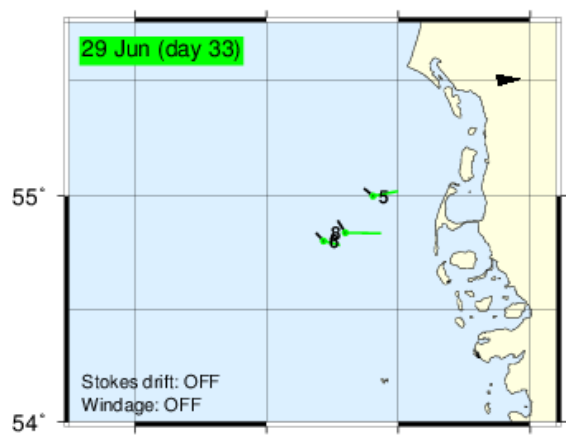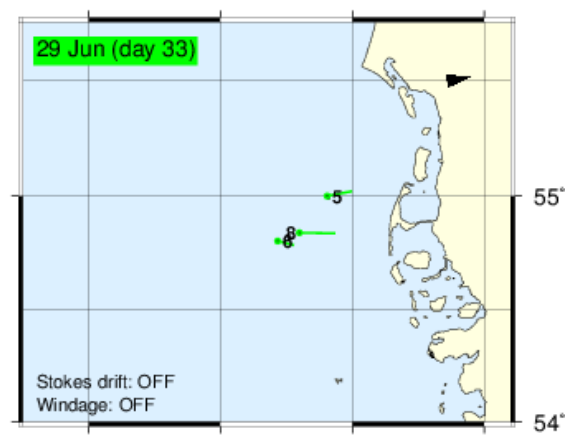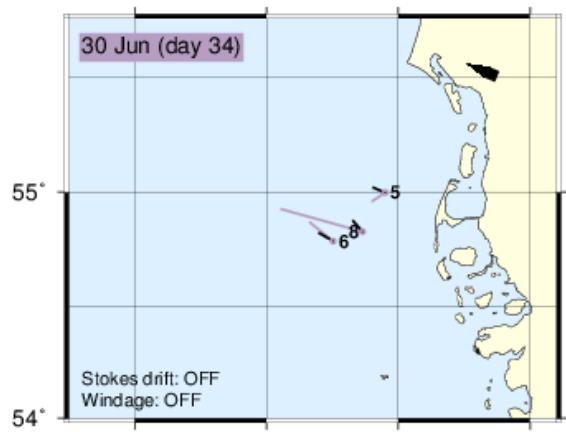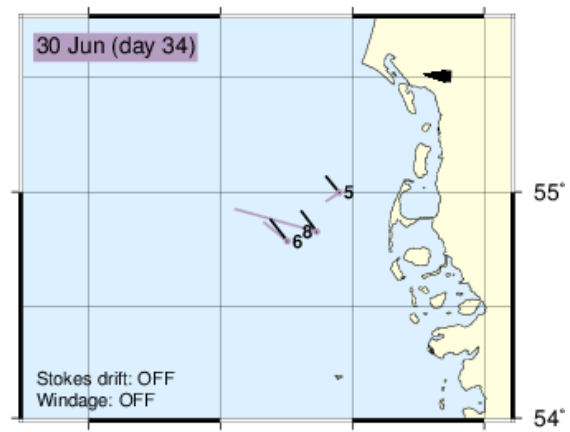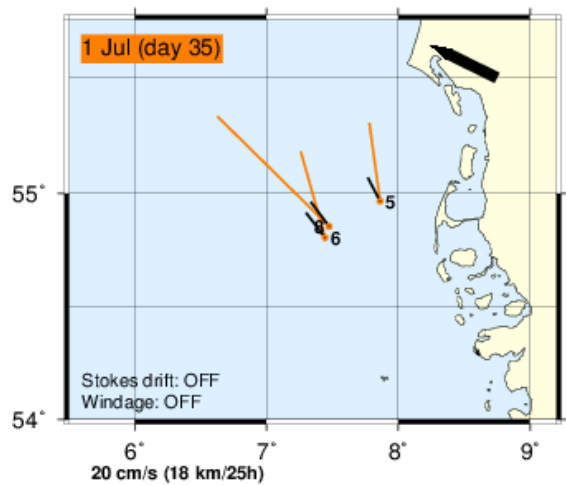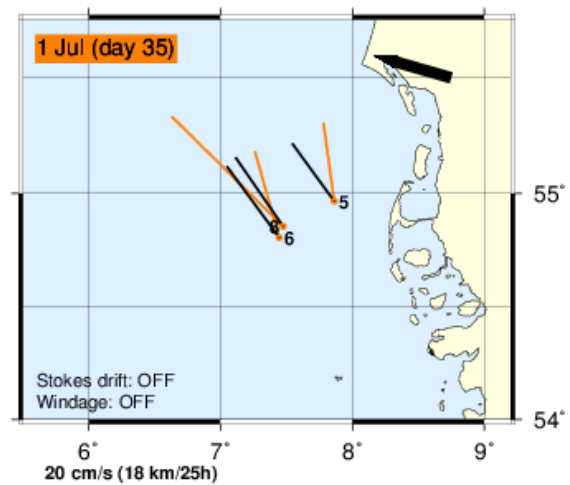

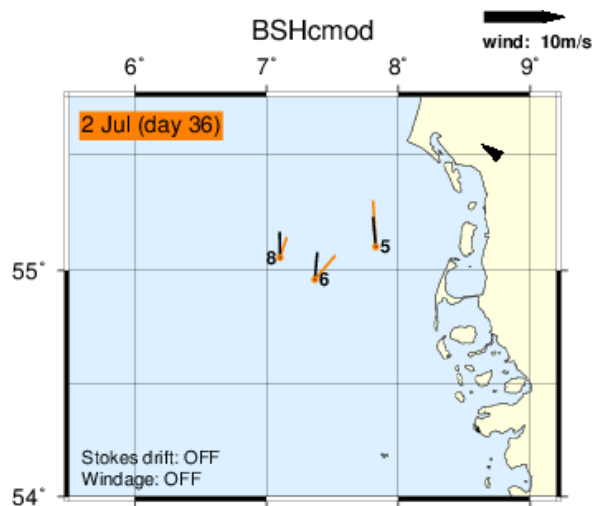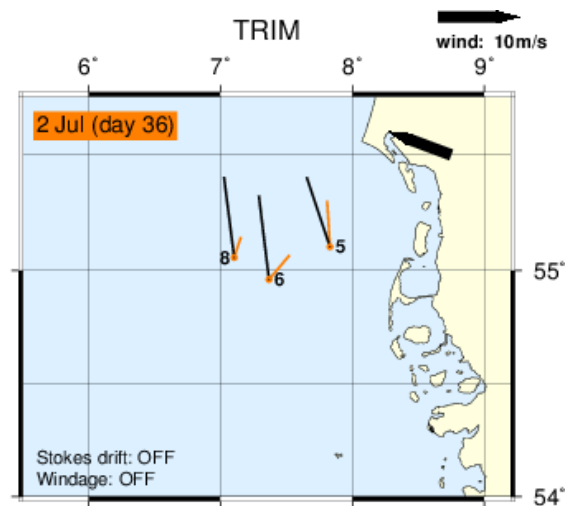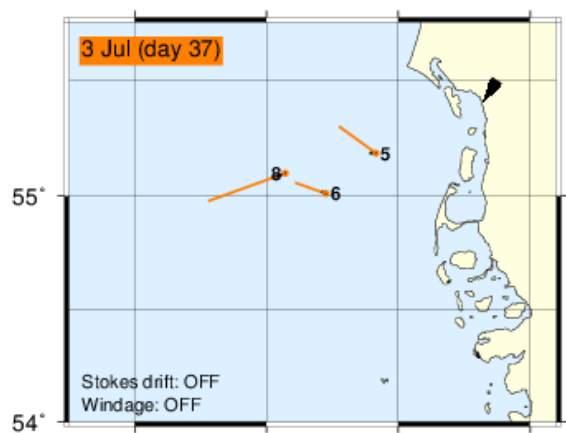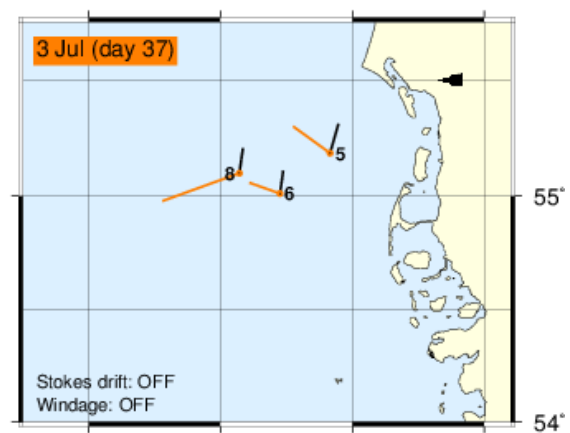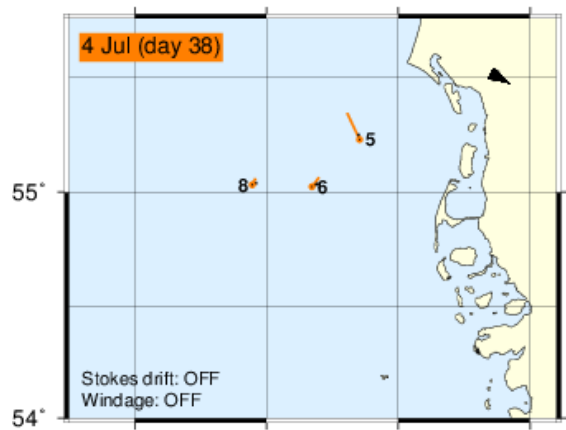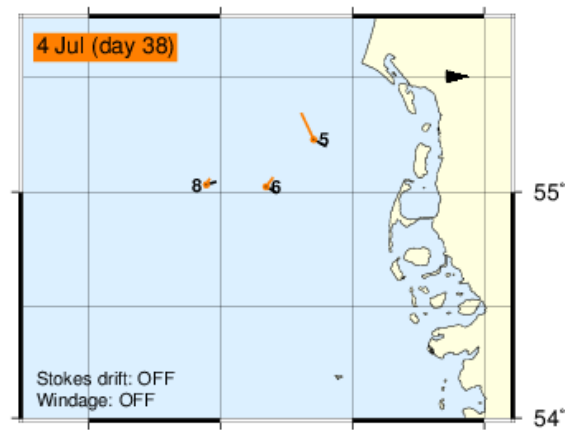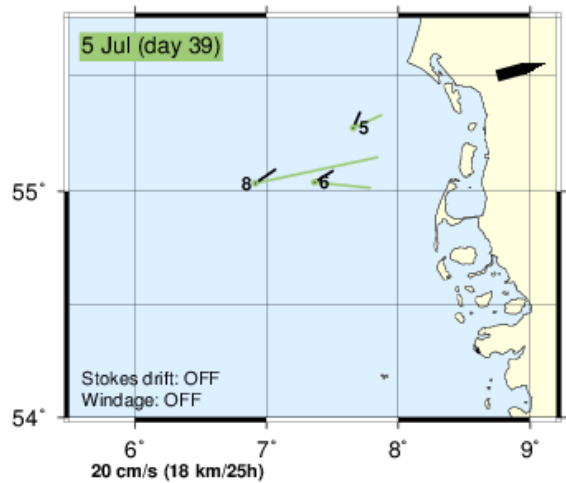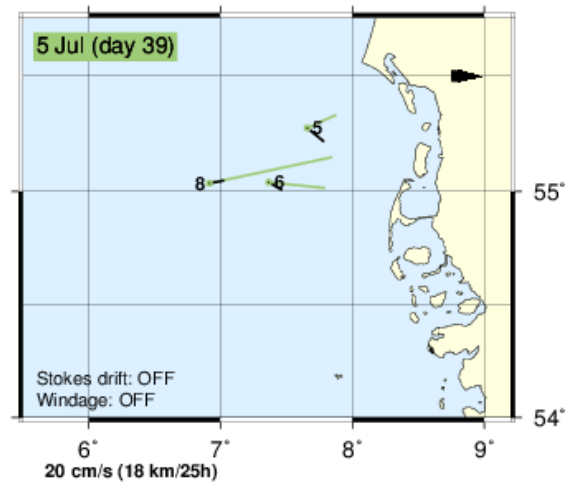

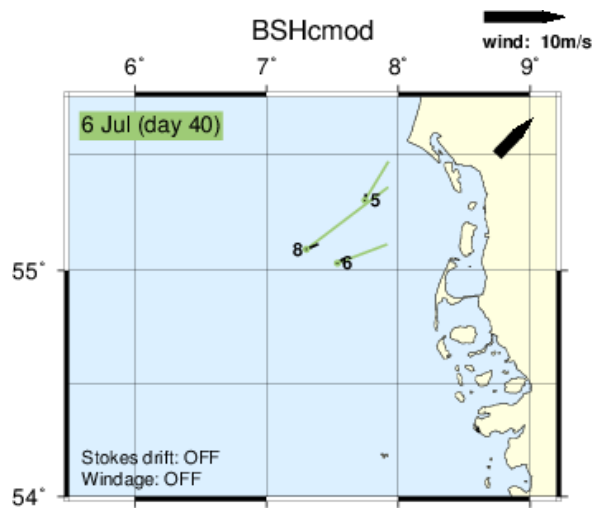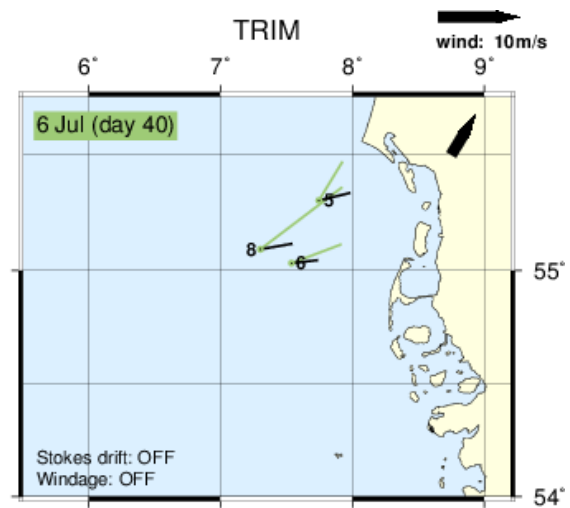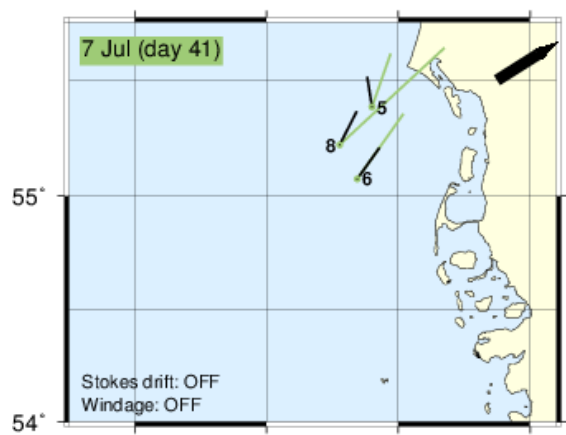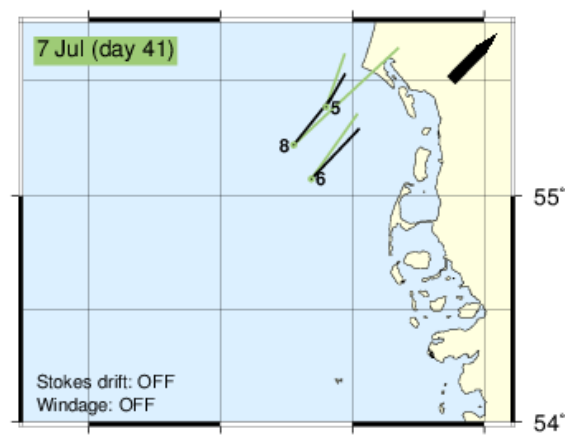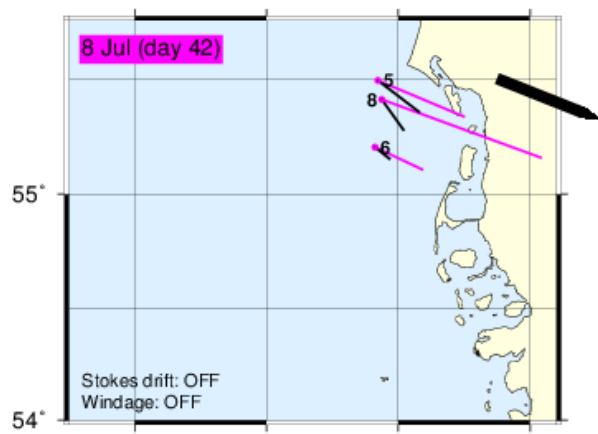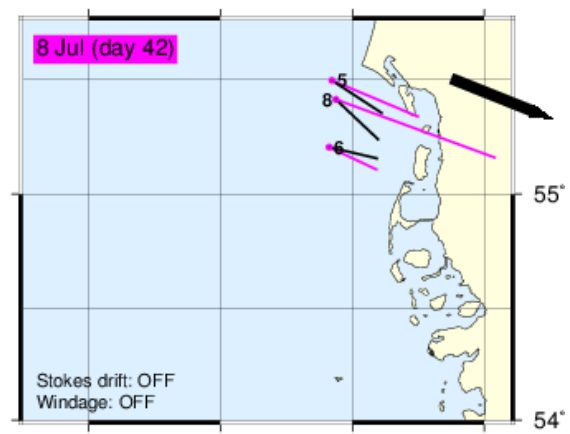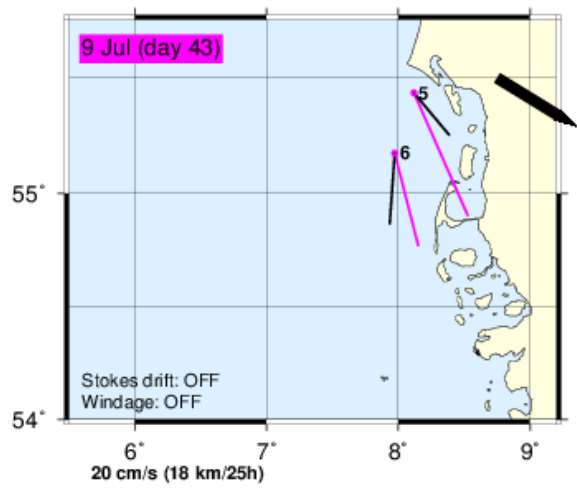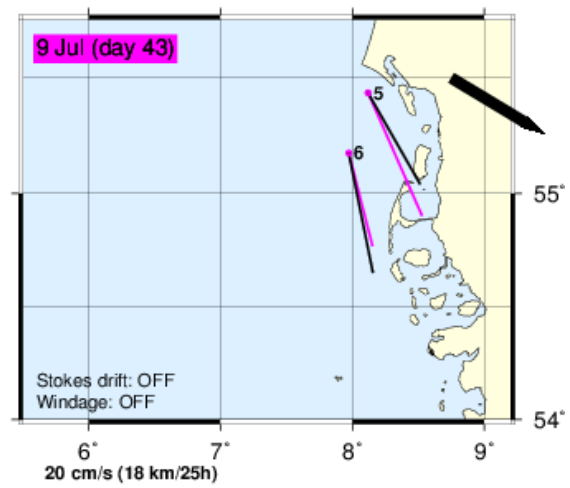

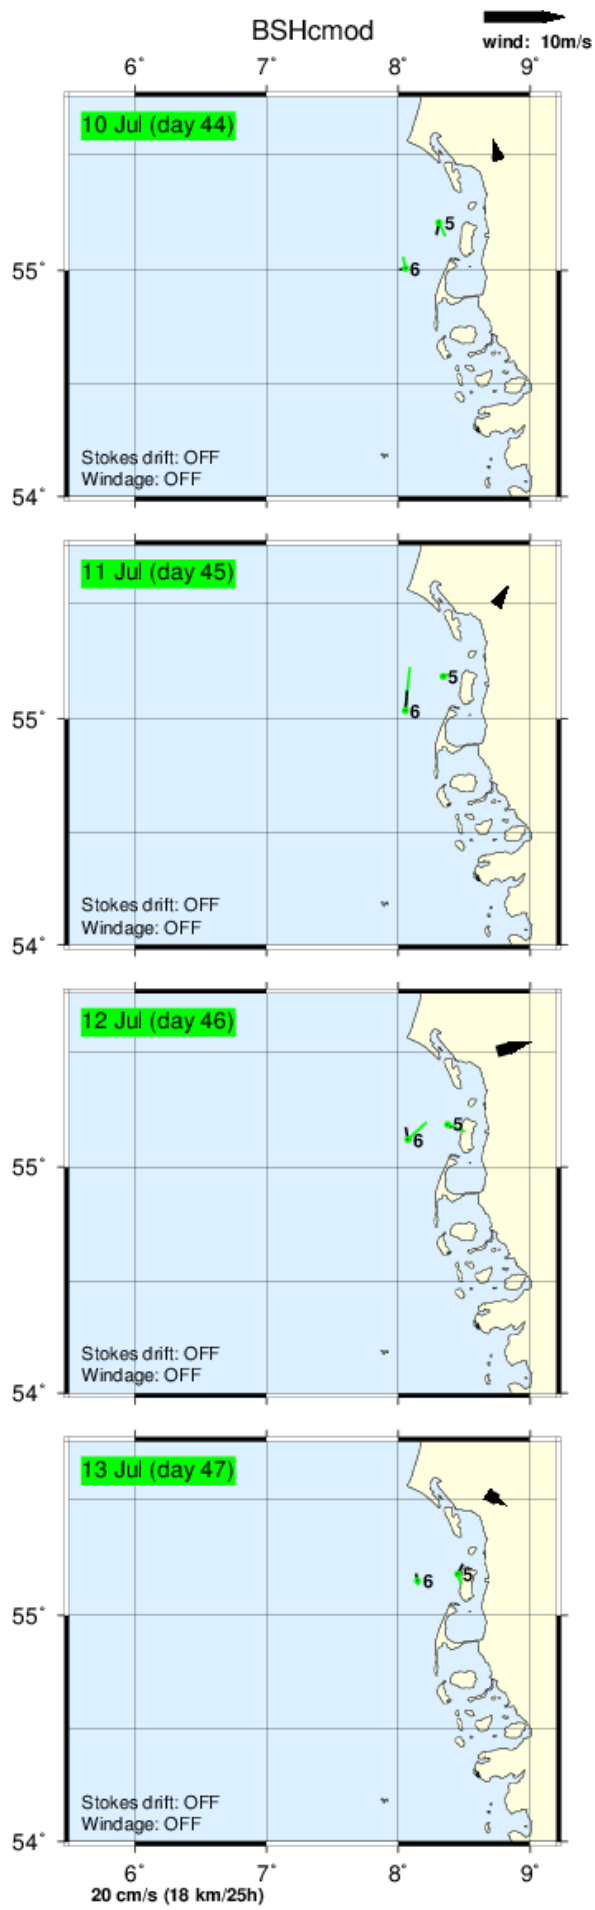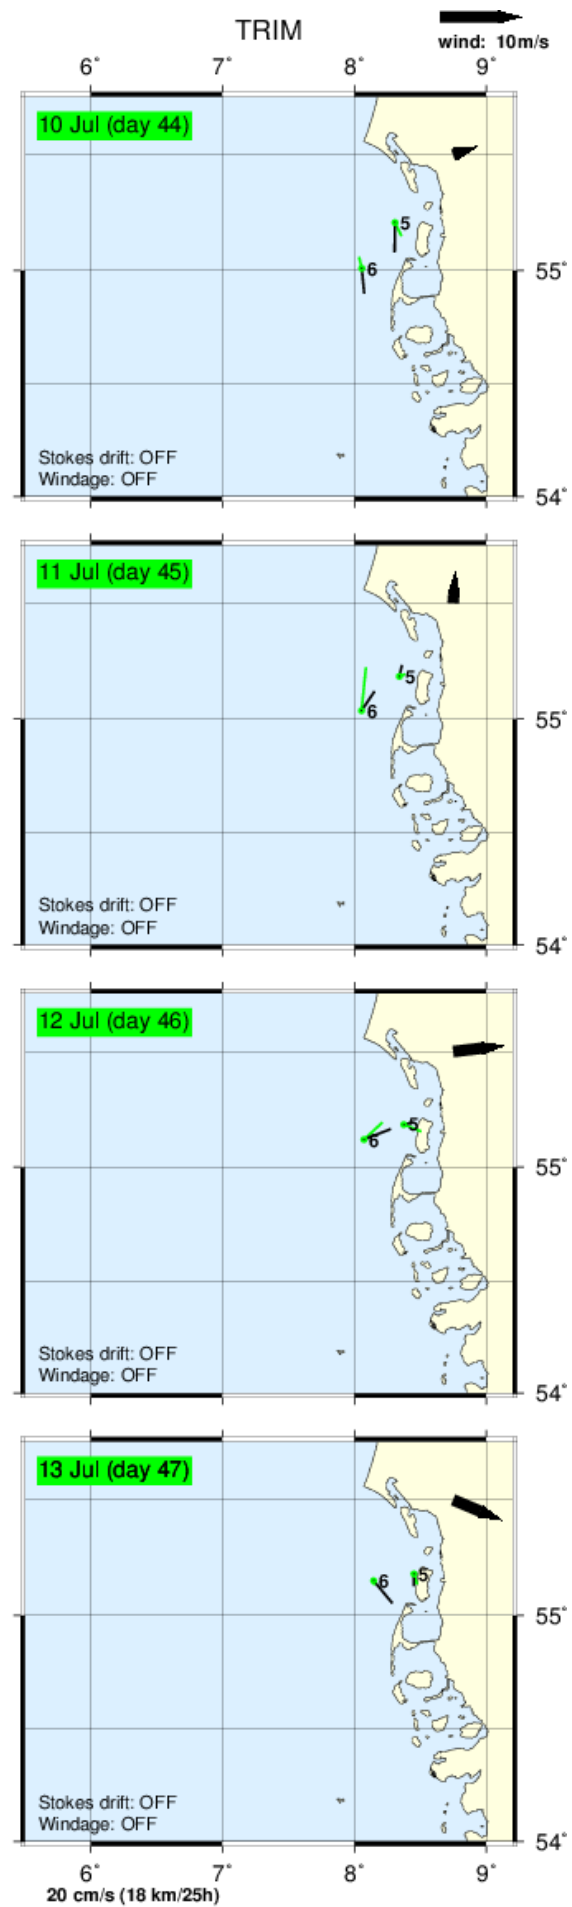

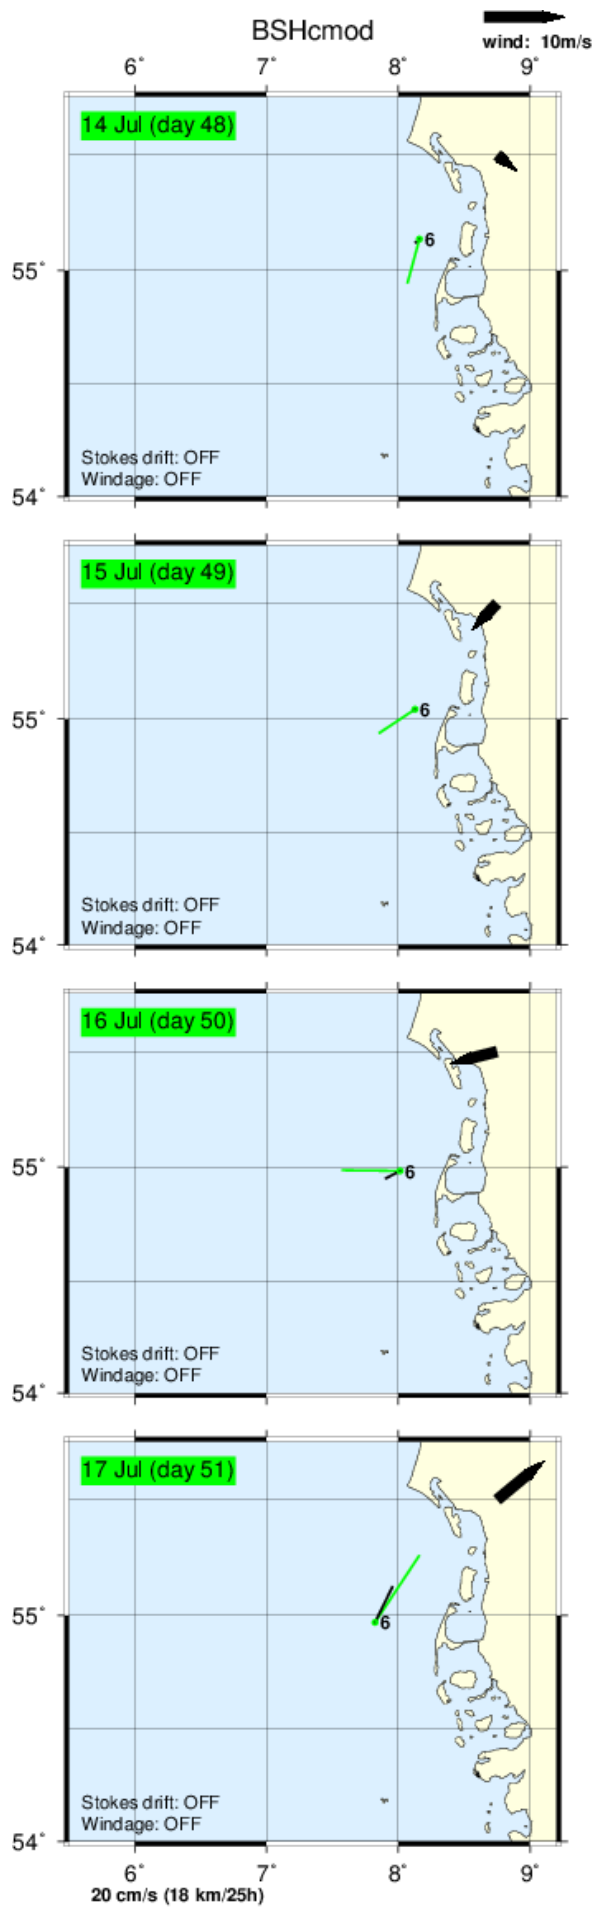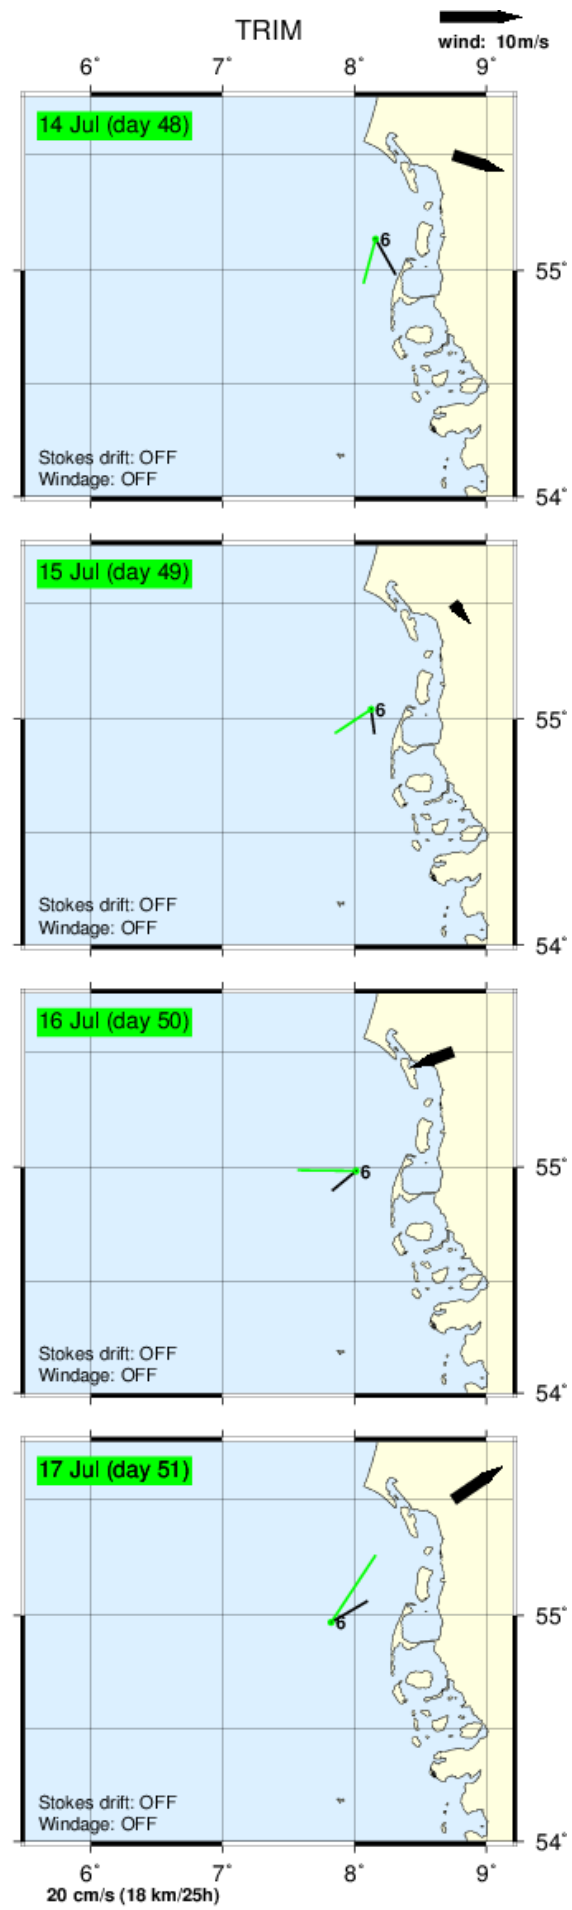

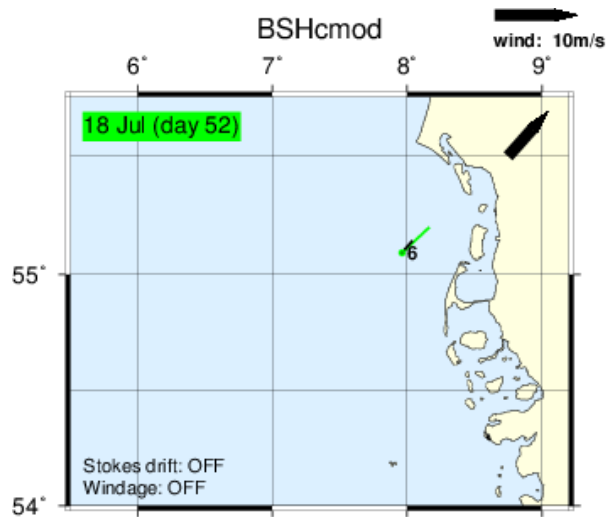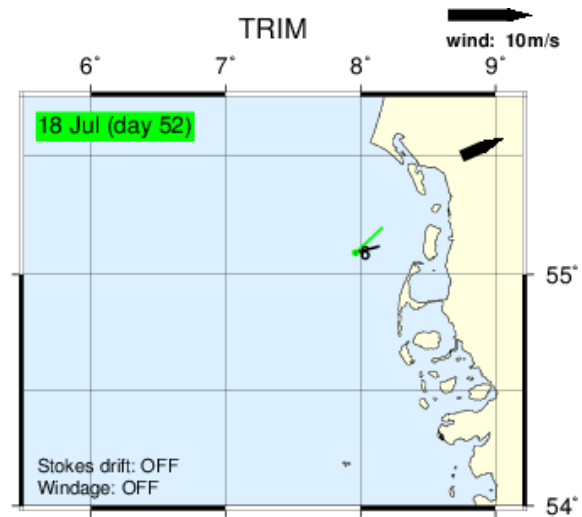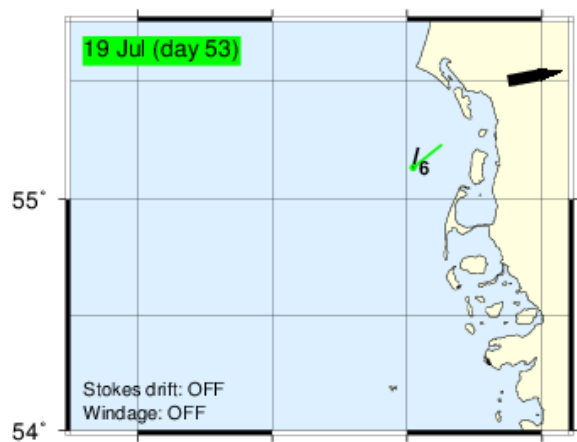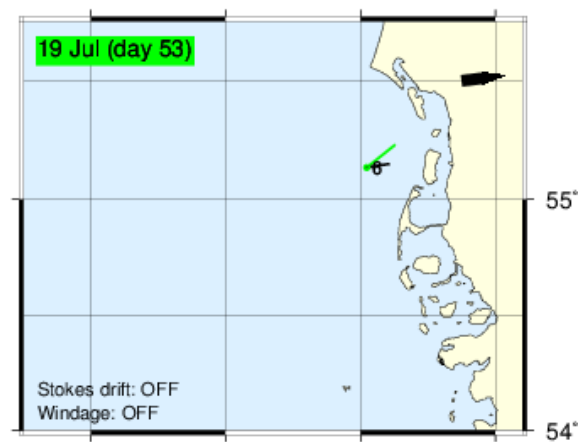

Supplement: Supplementary file 2 [file os-13-799-2017-supplement.zip]

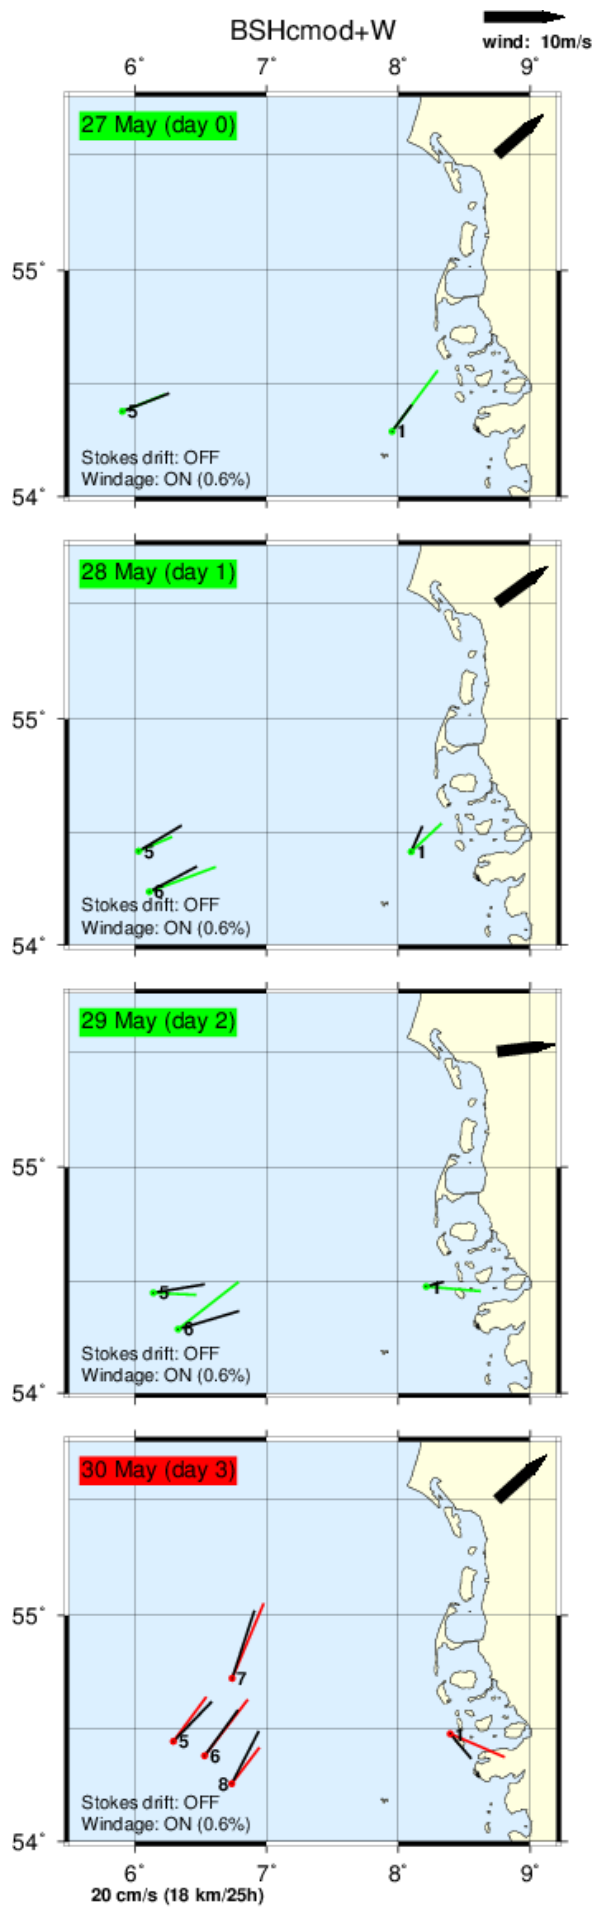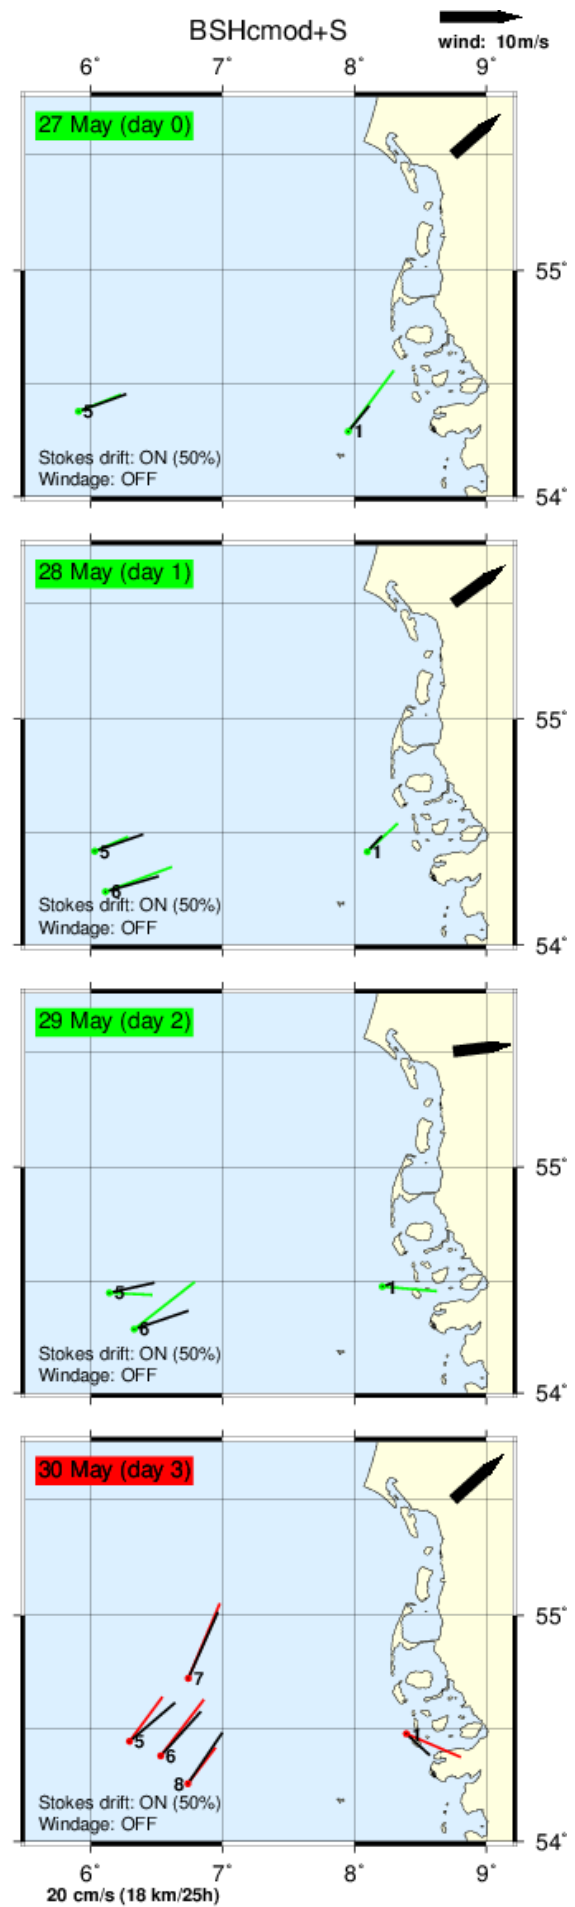

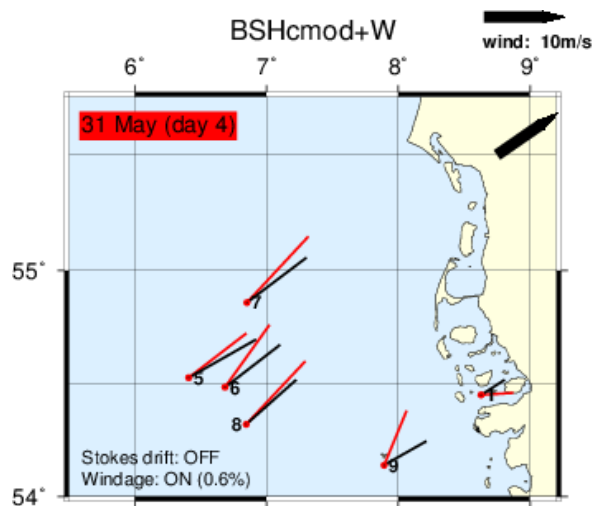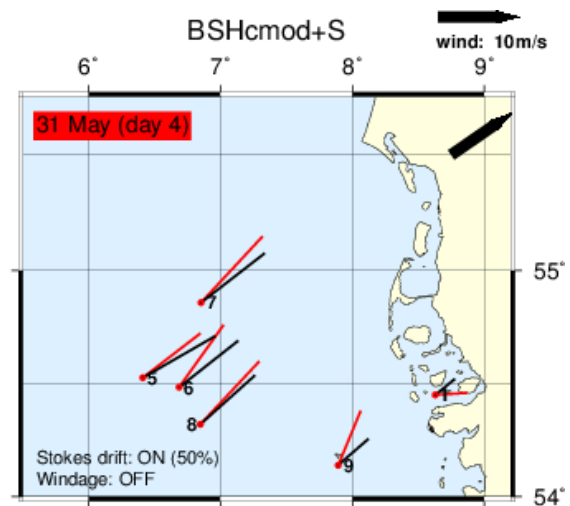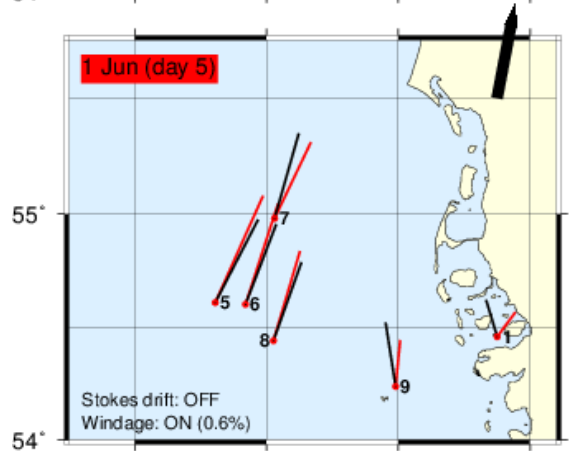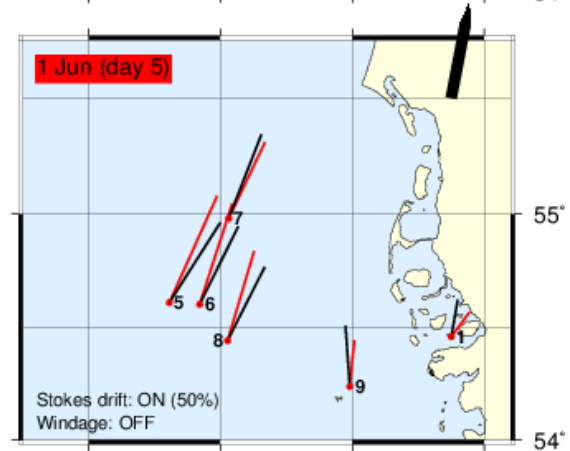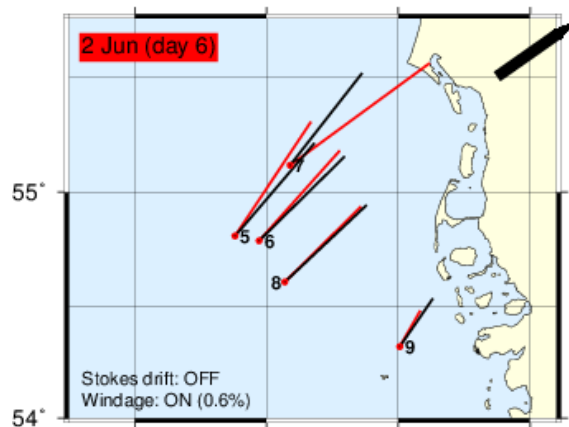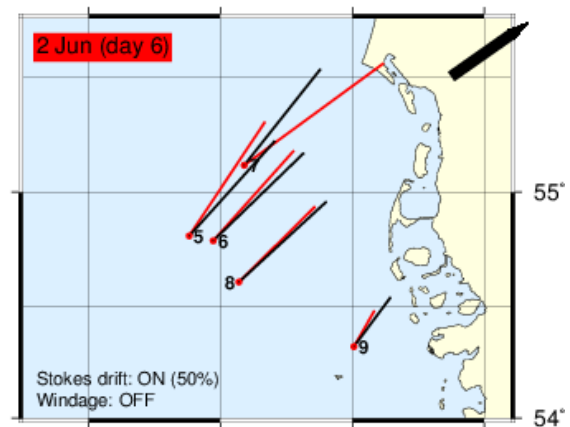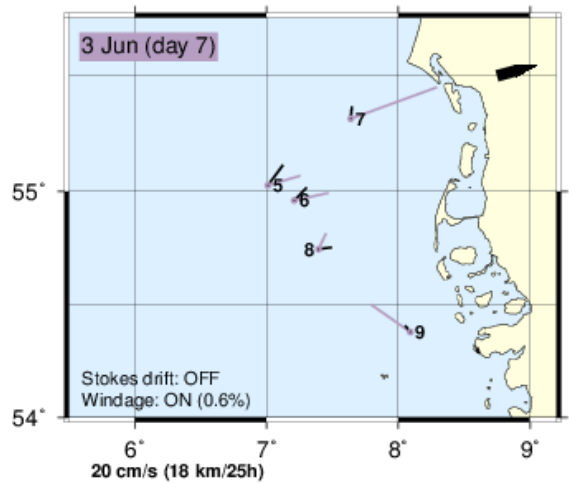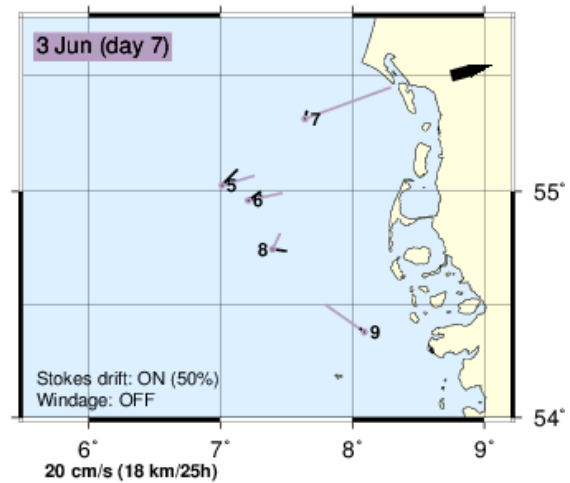

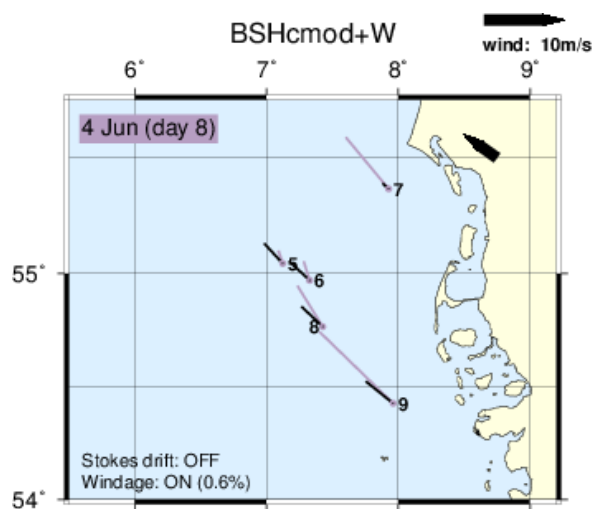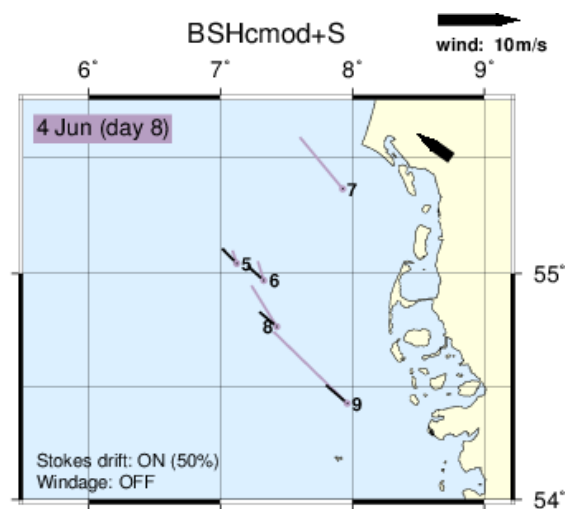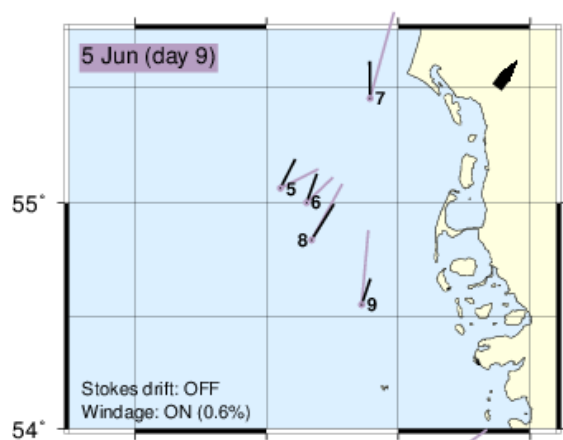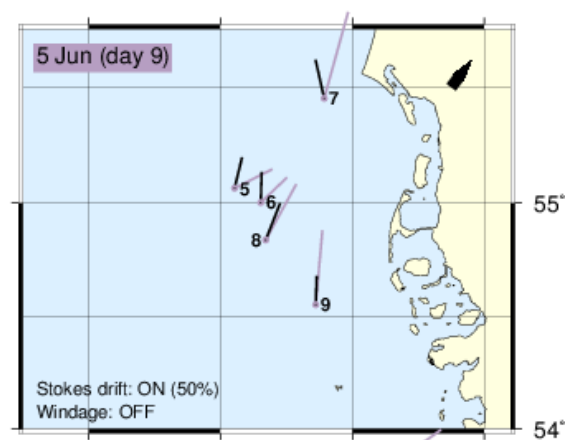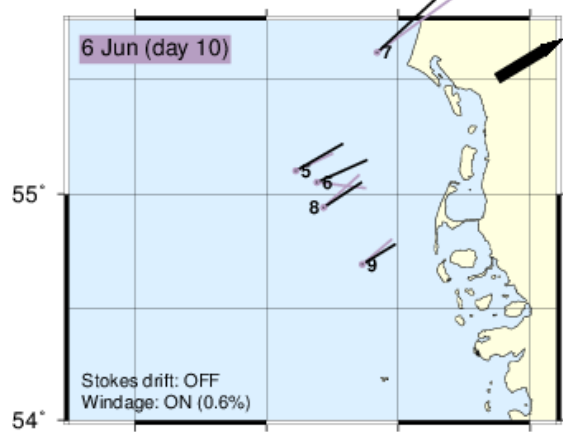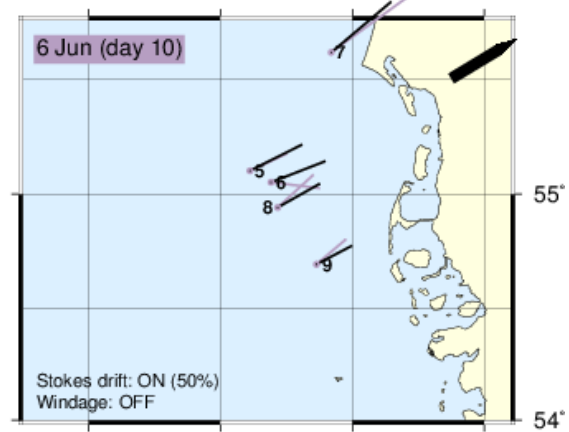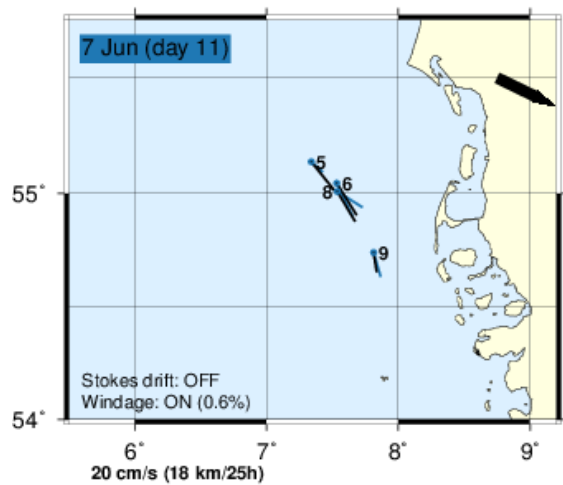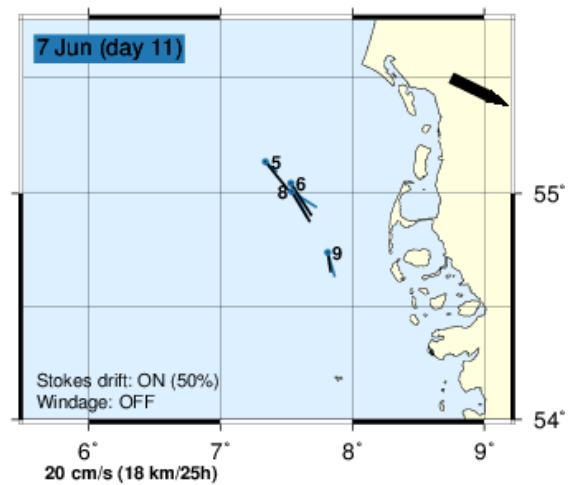

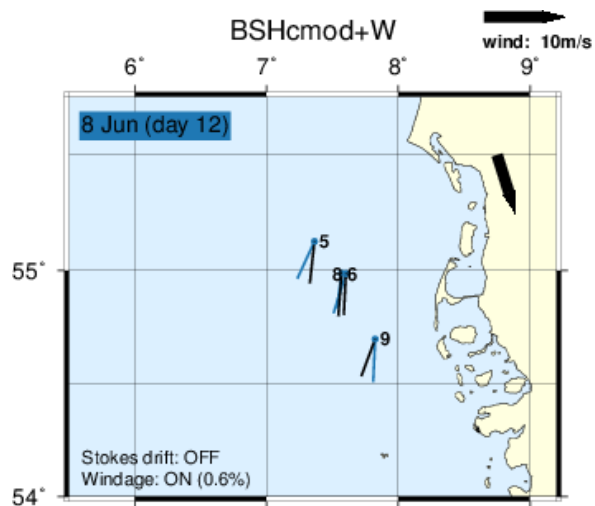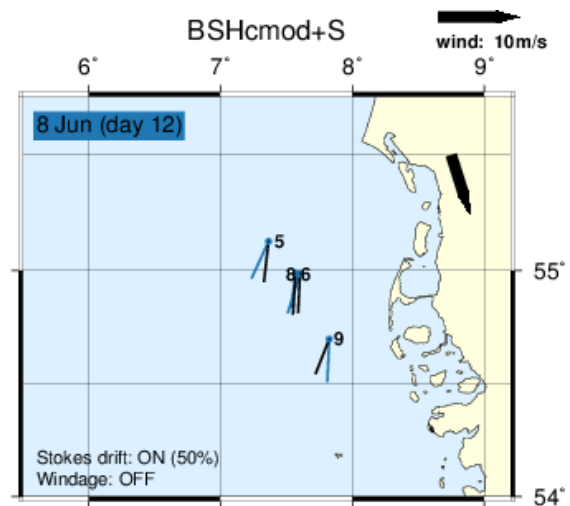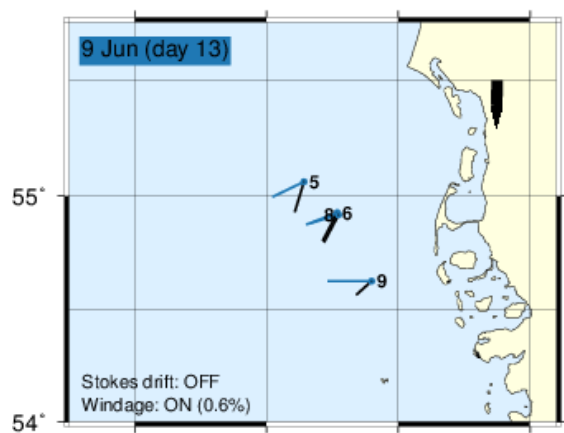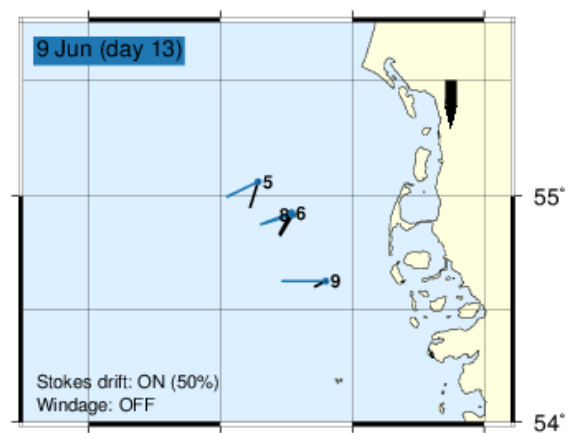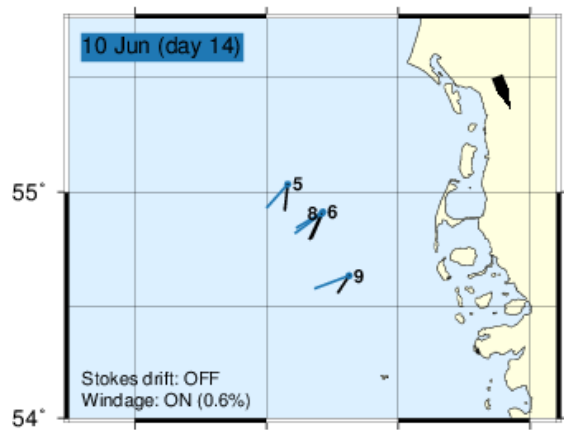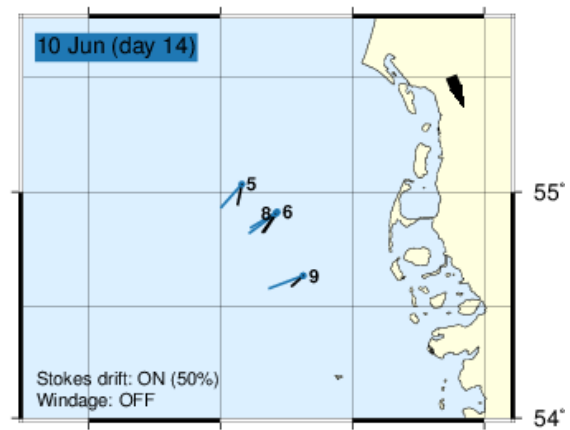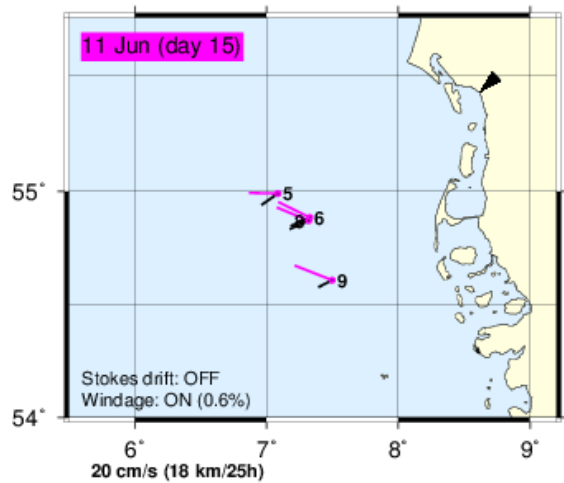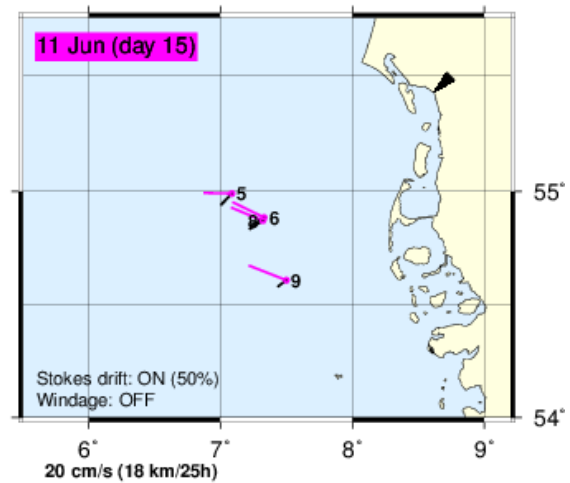

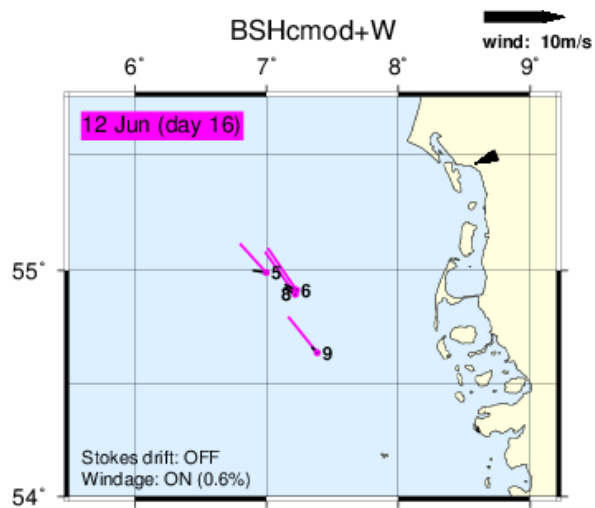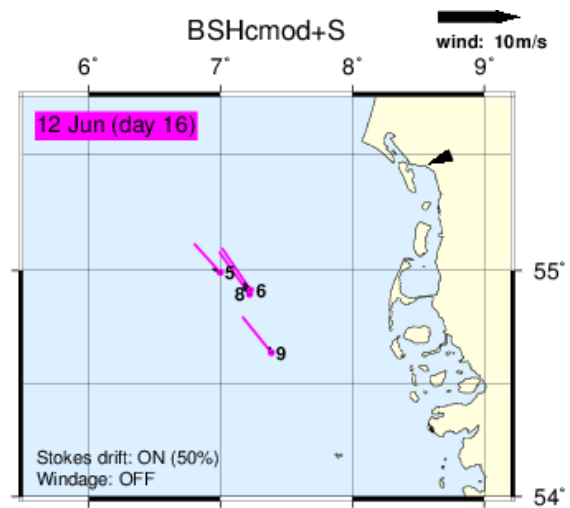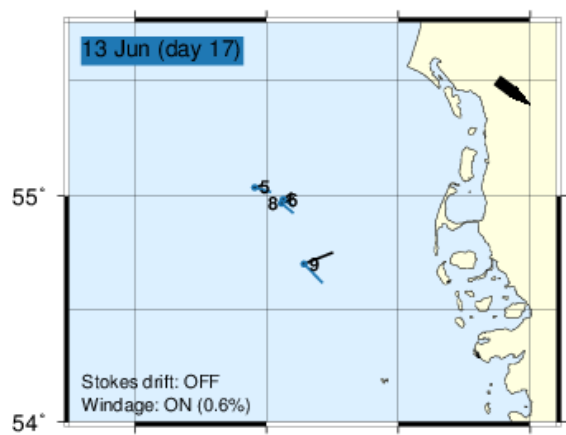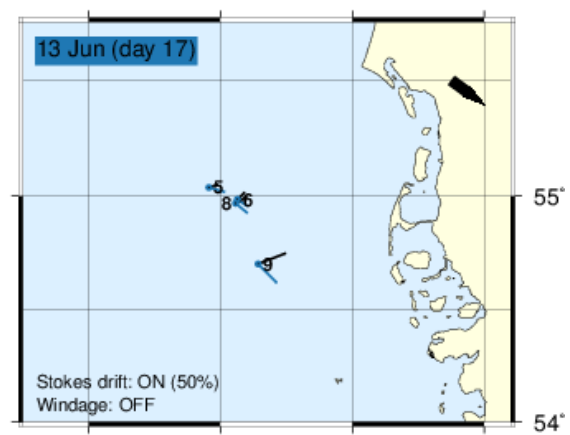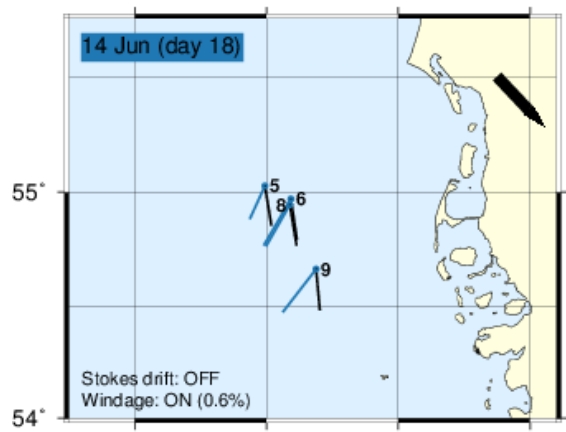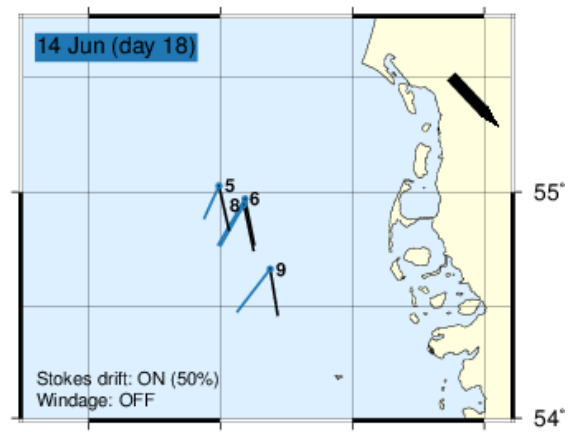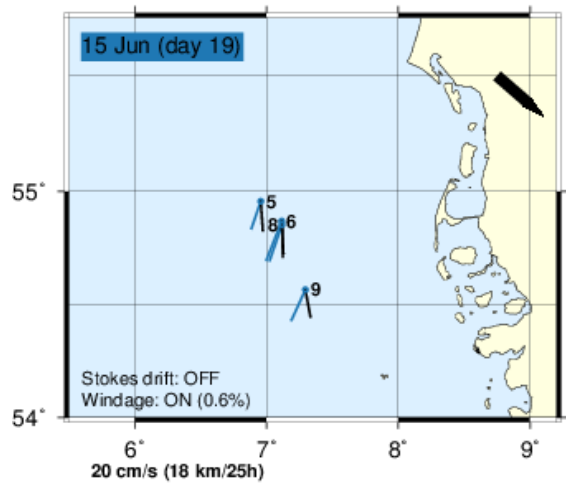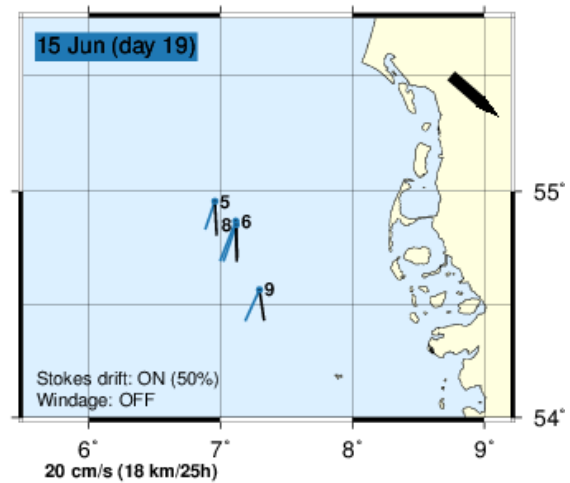

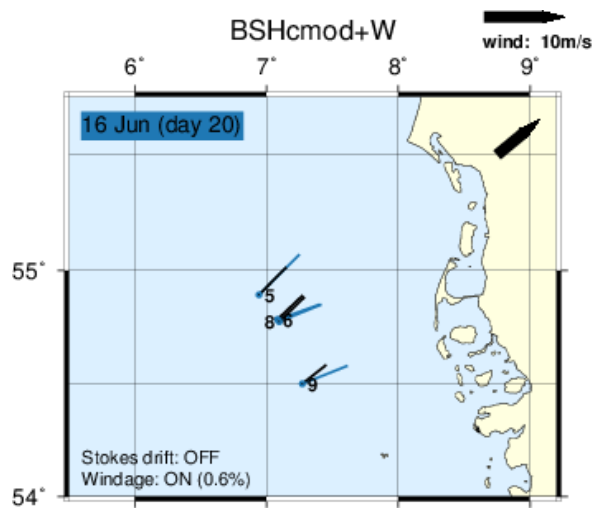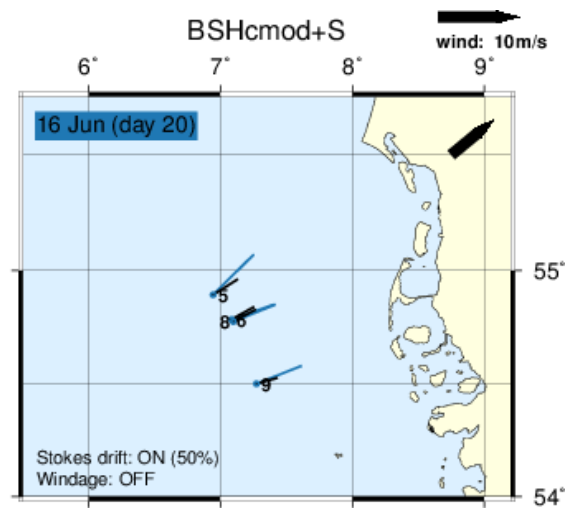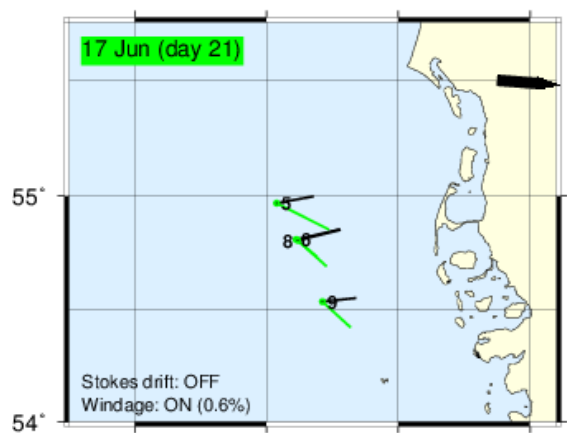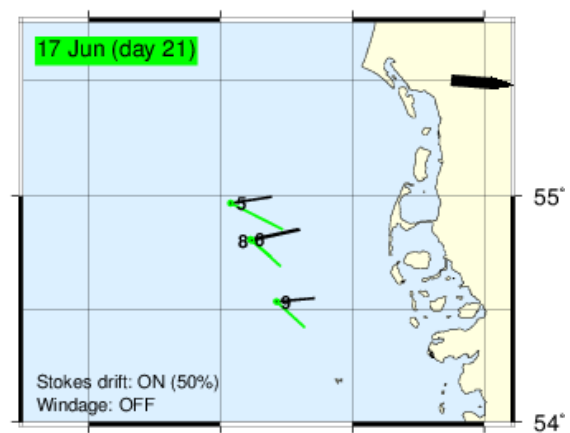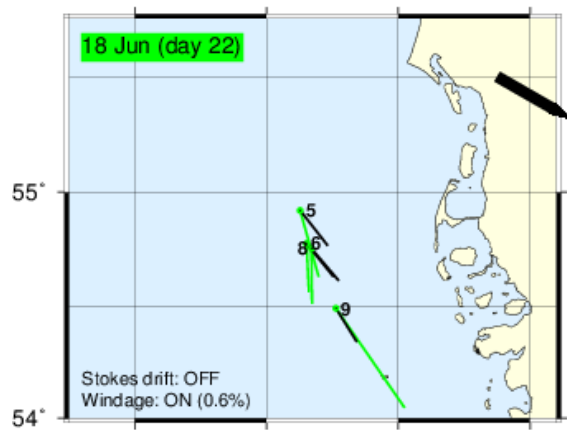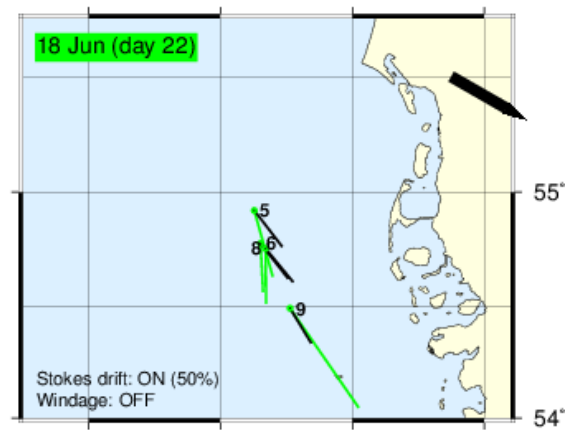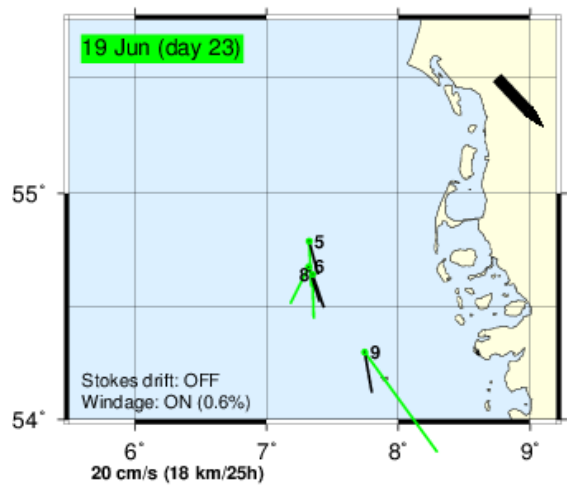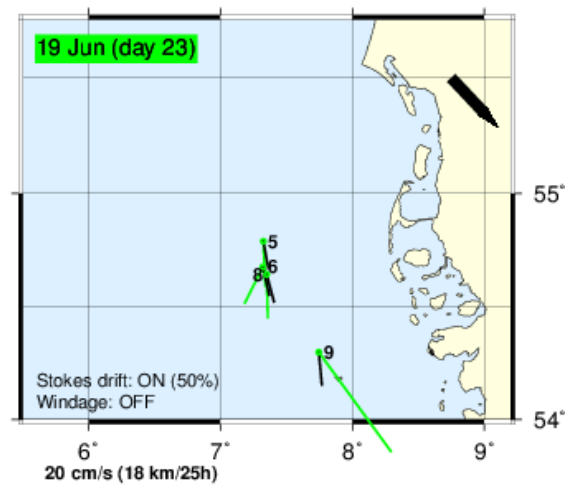

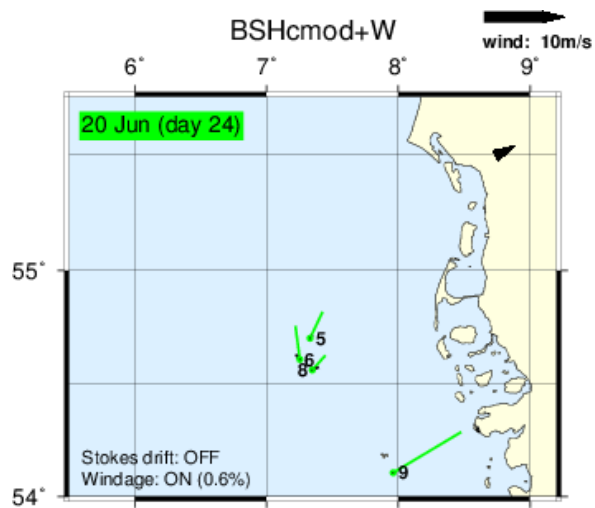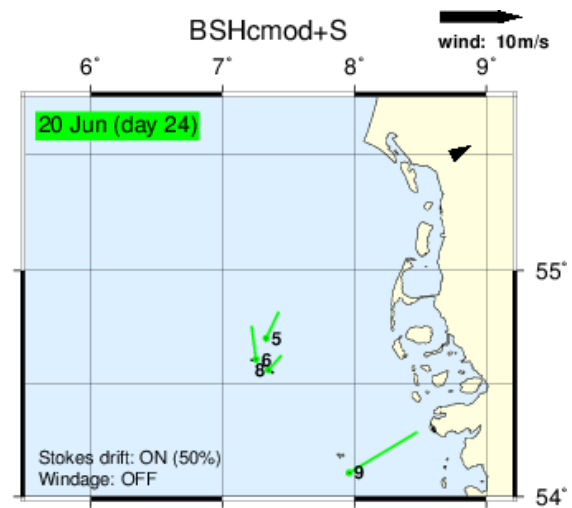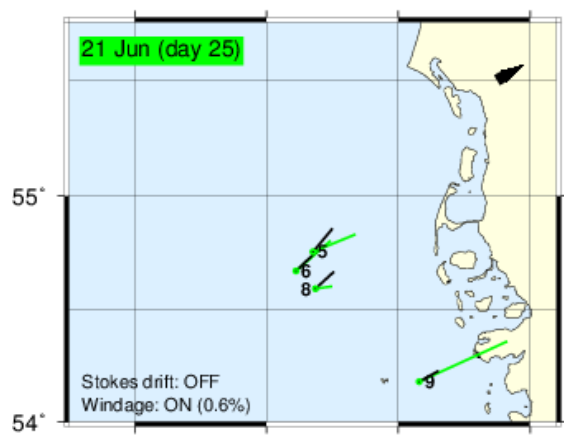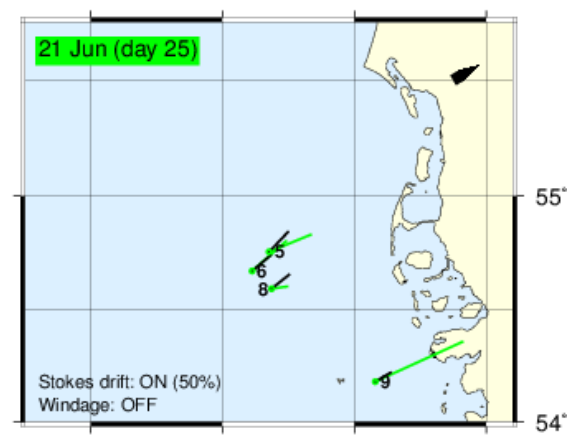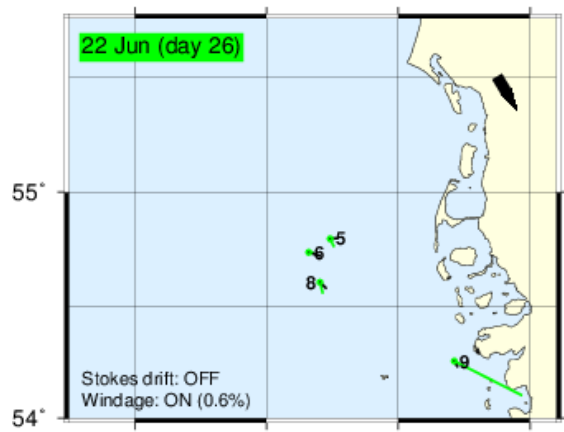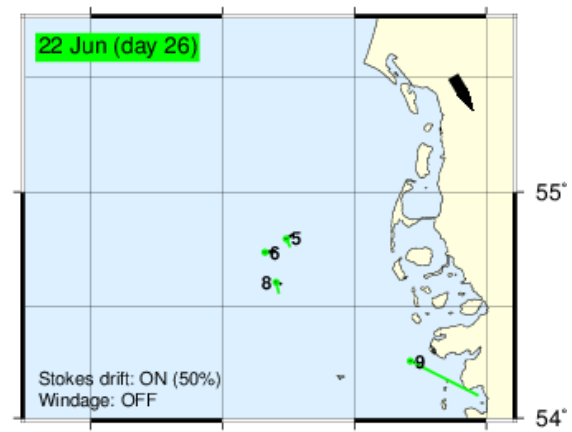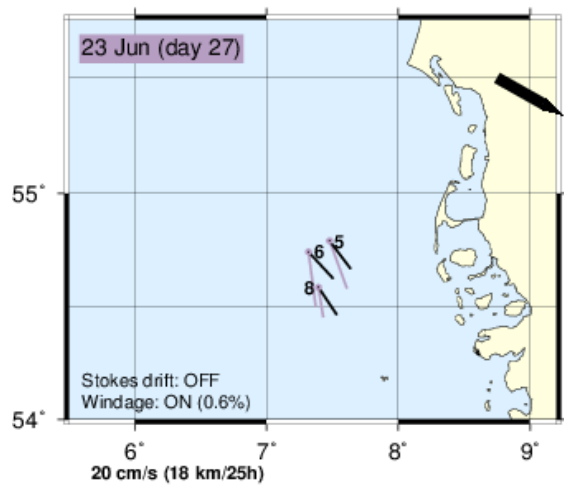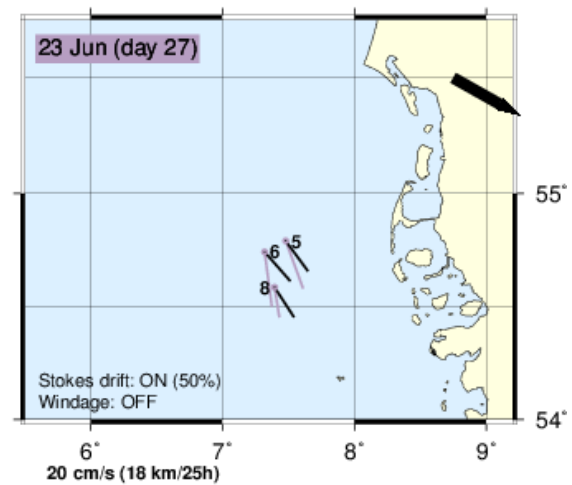

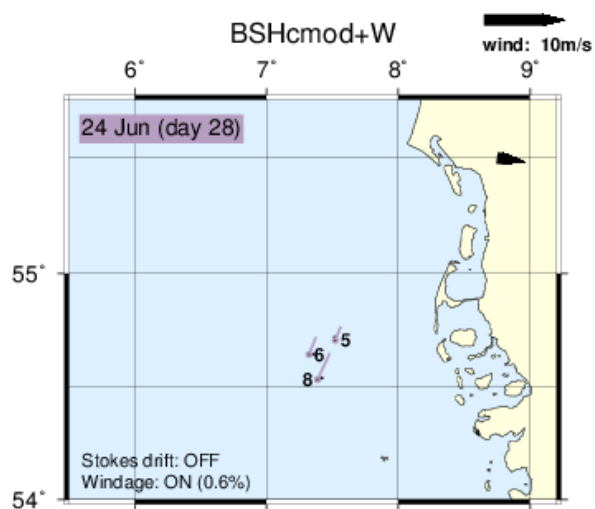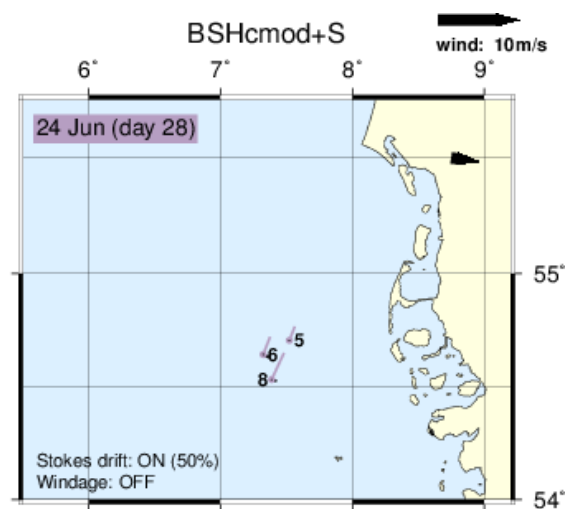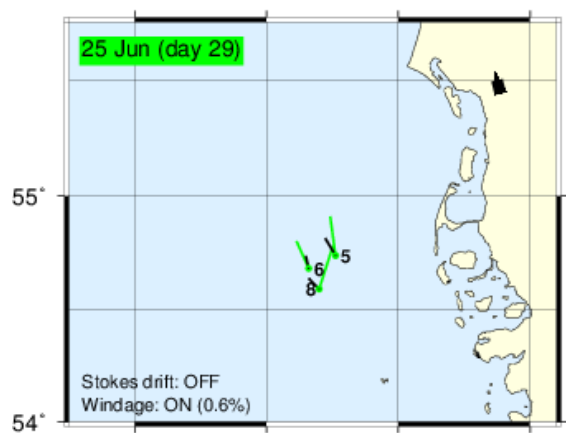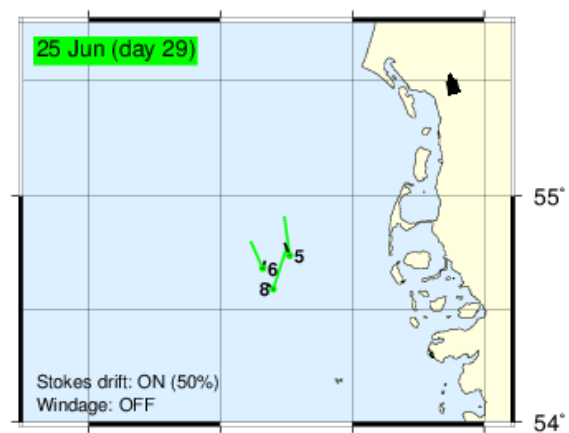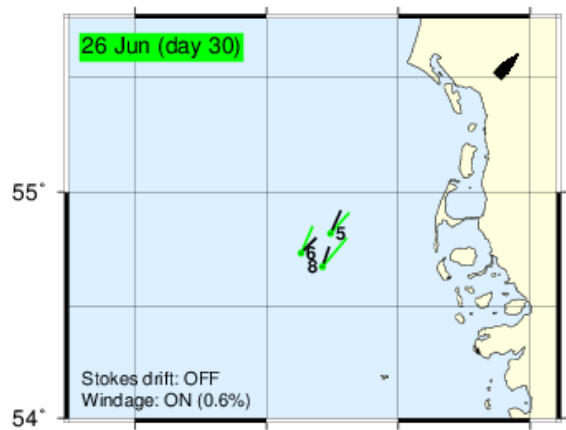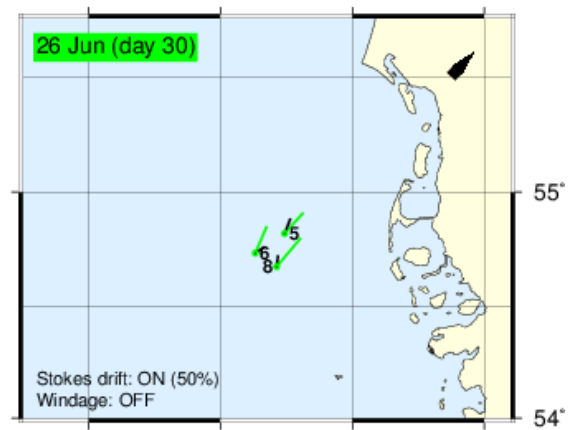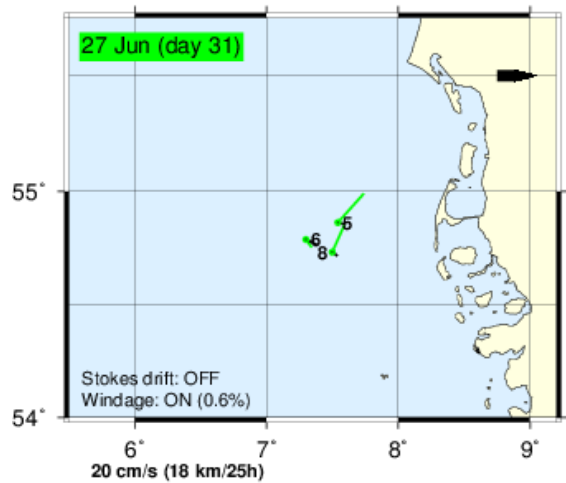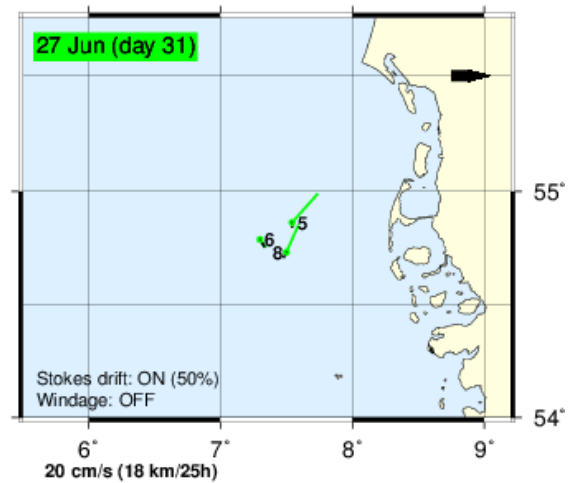



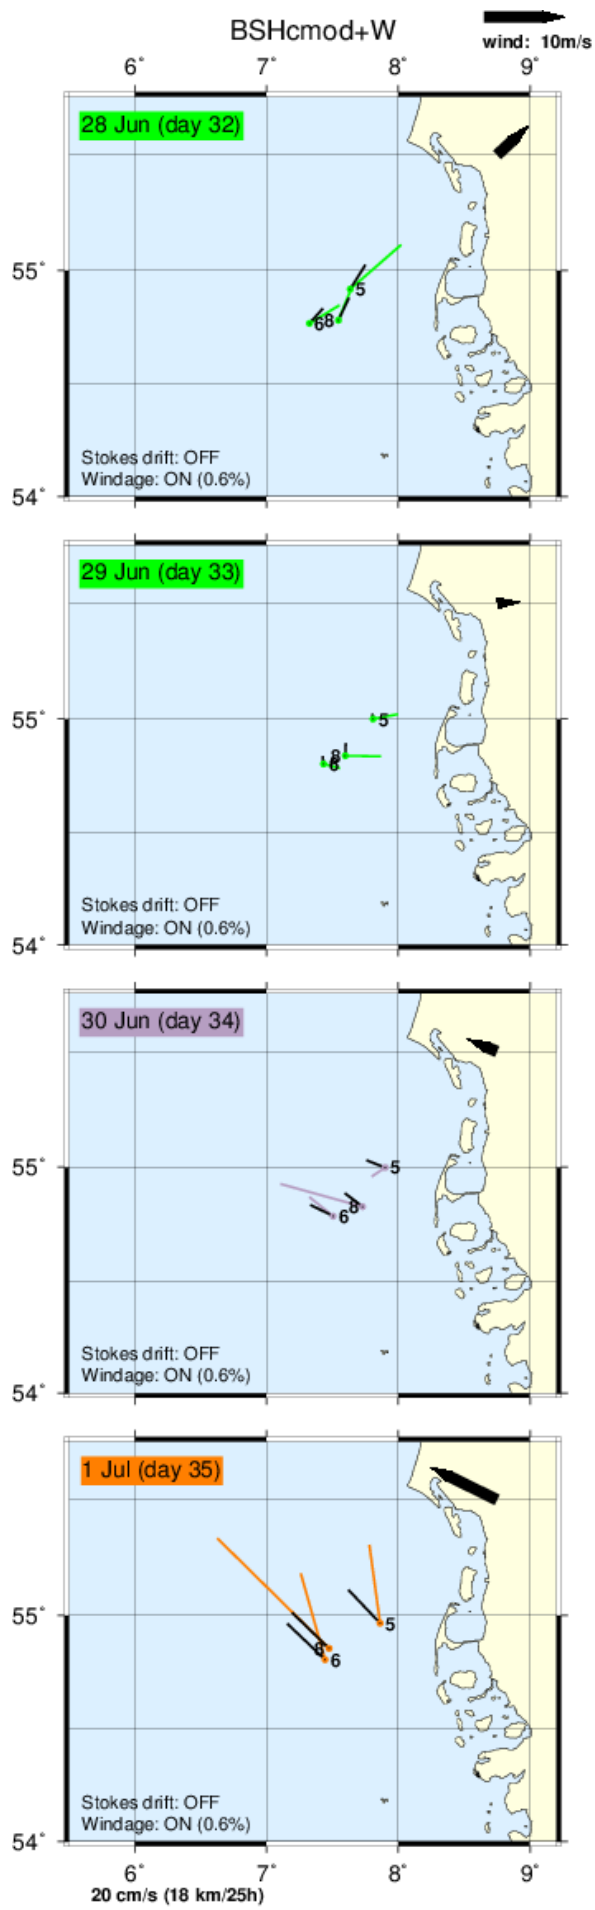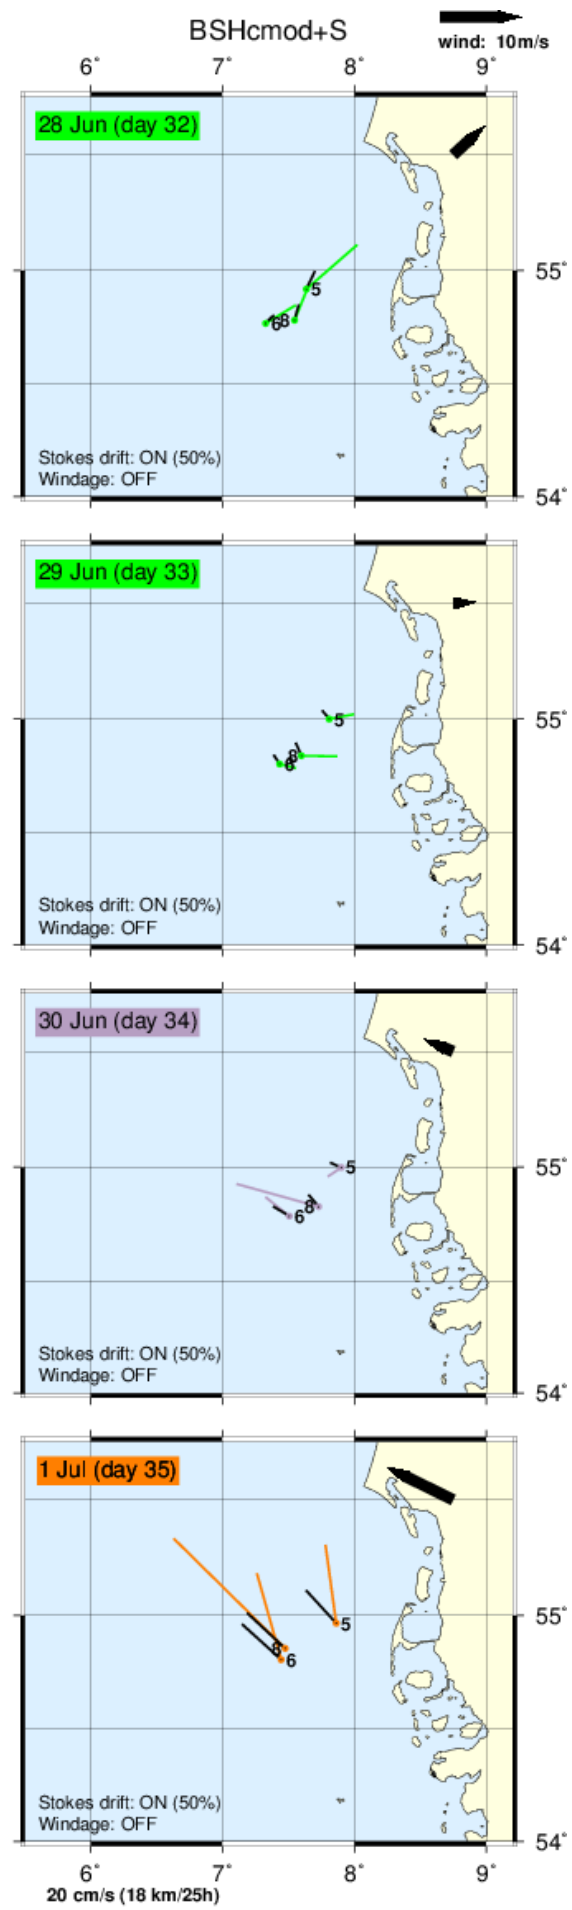

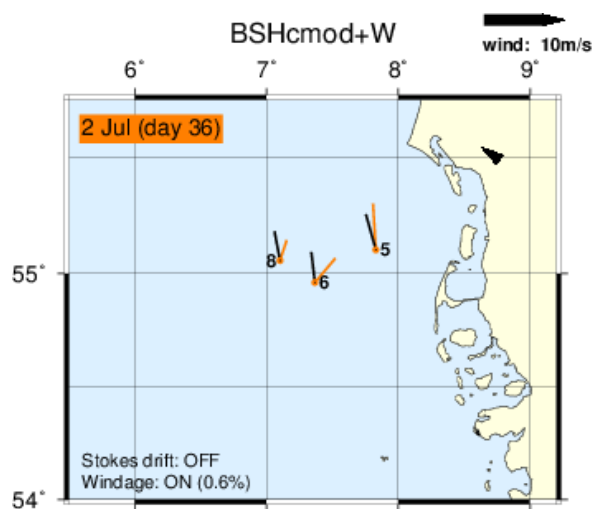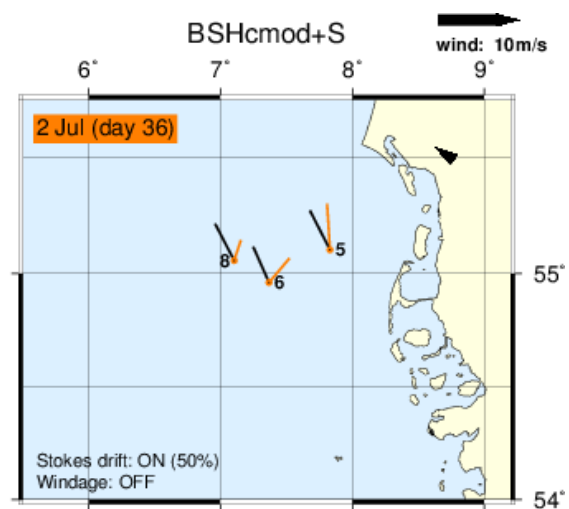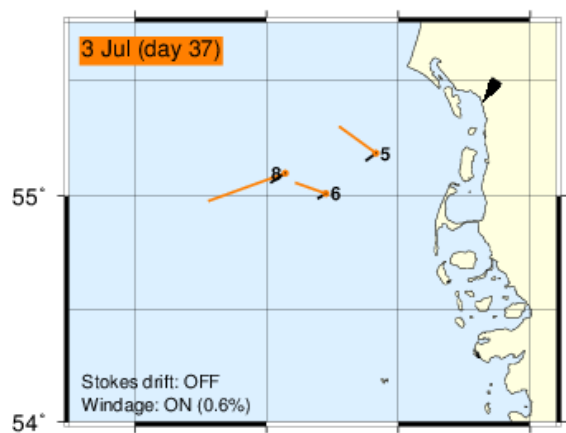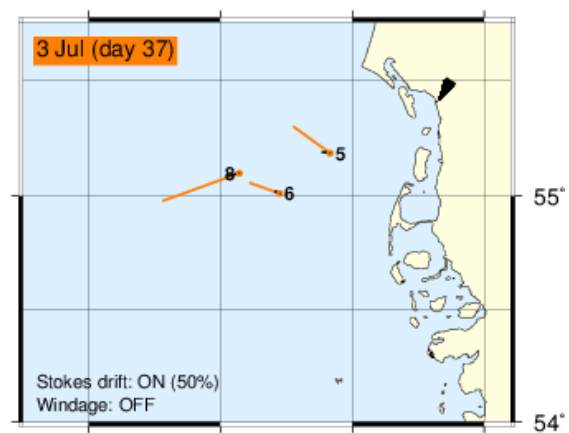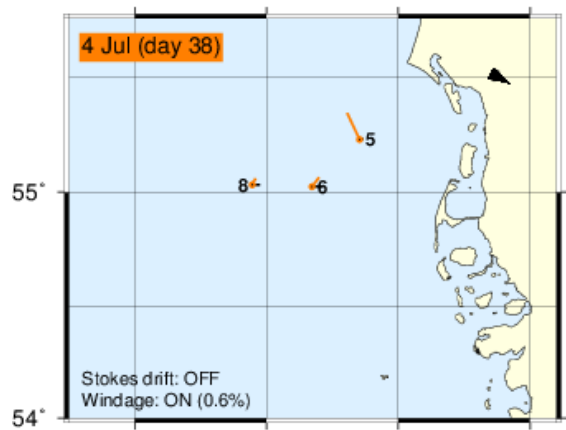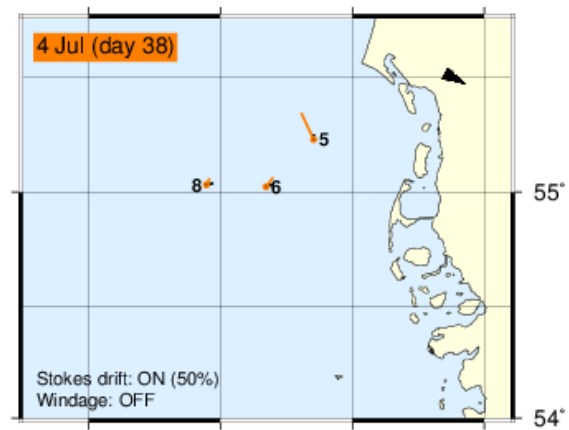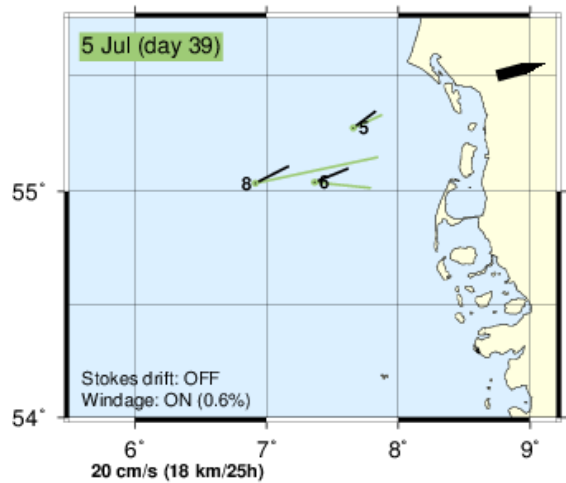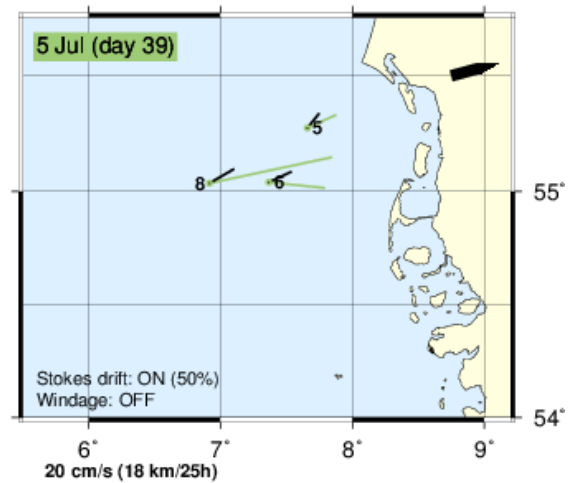

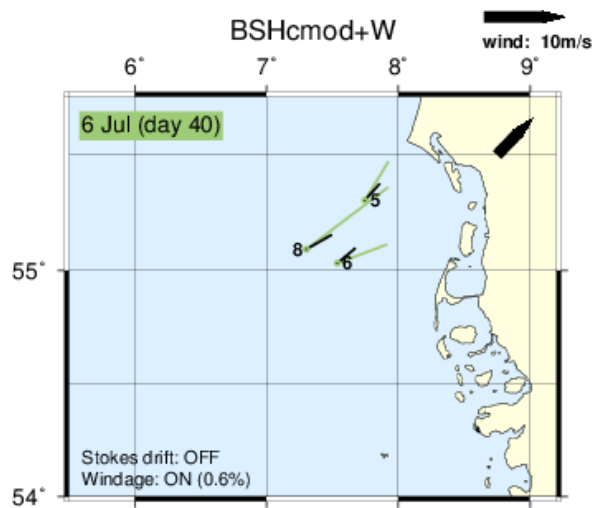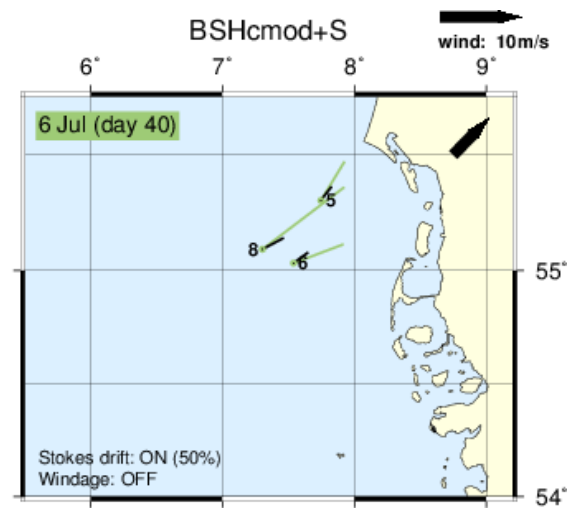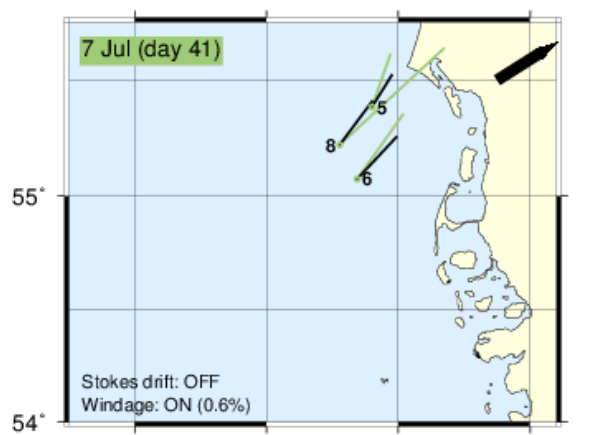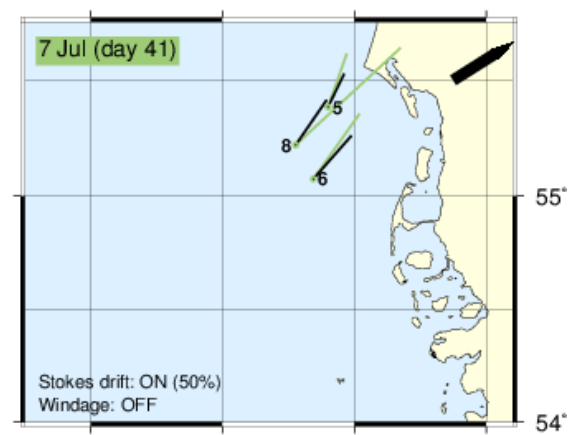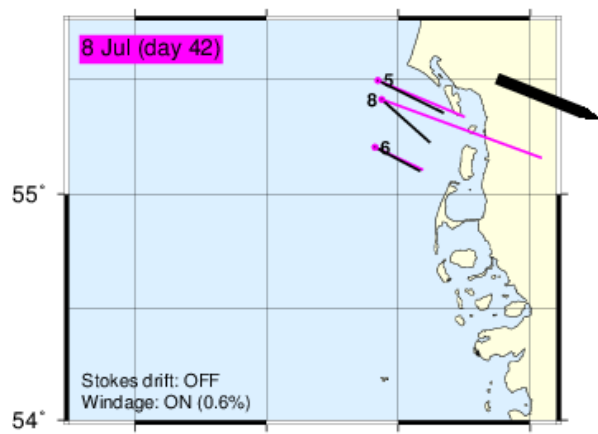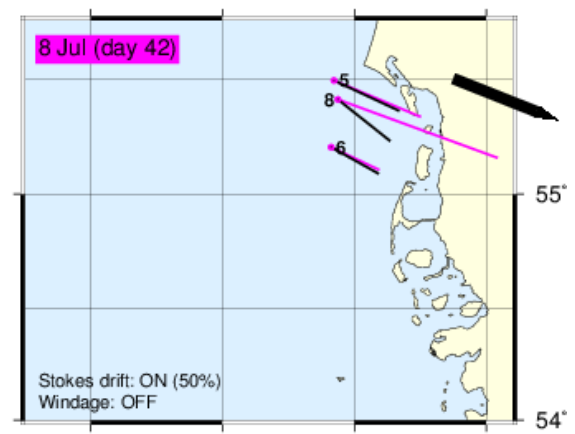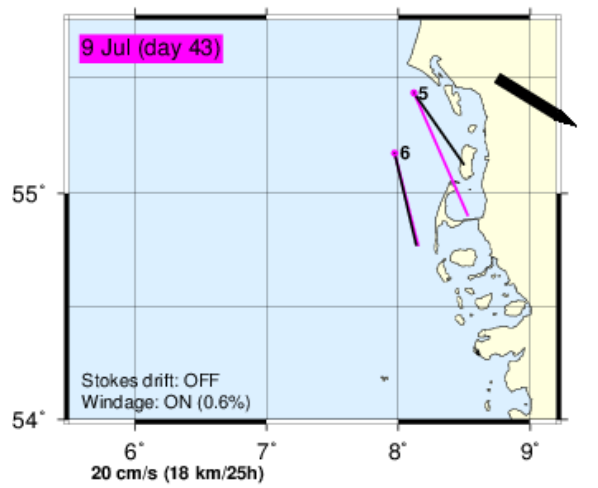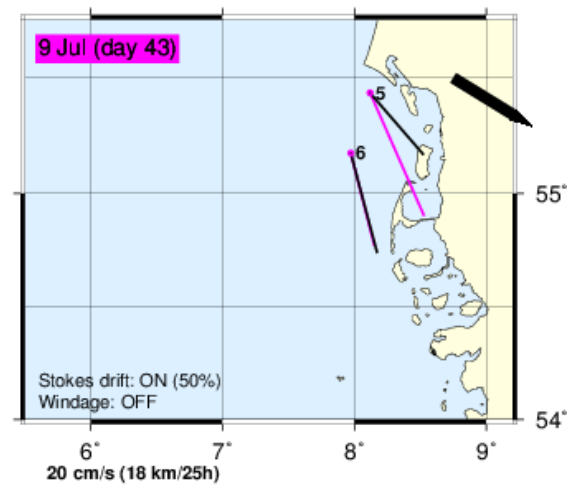

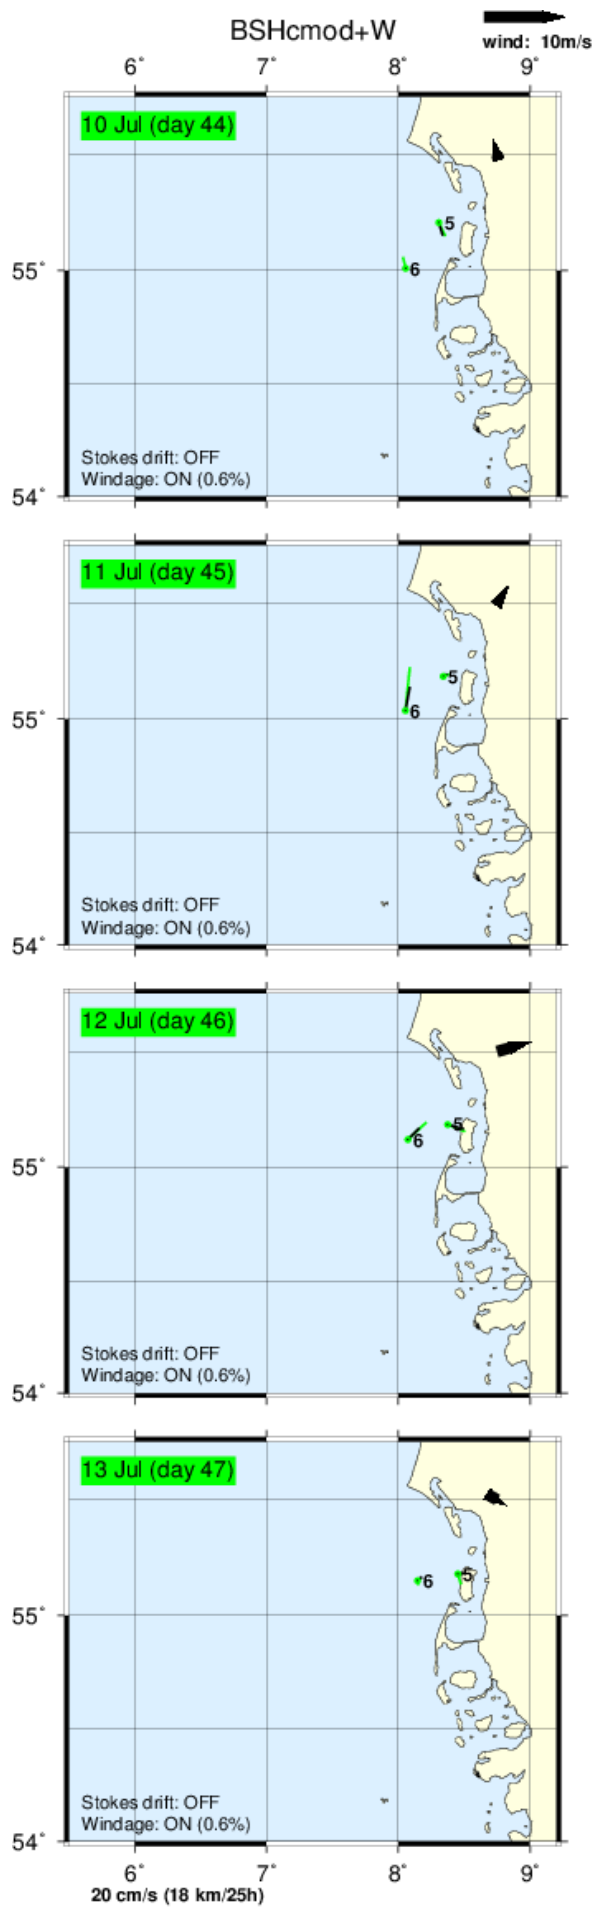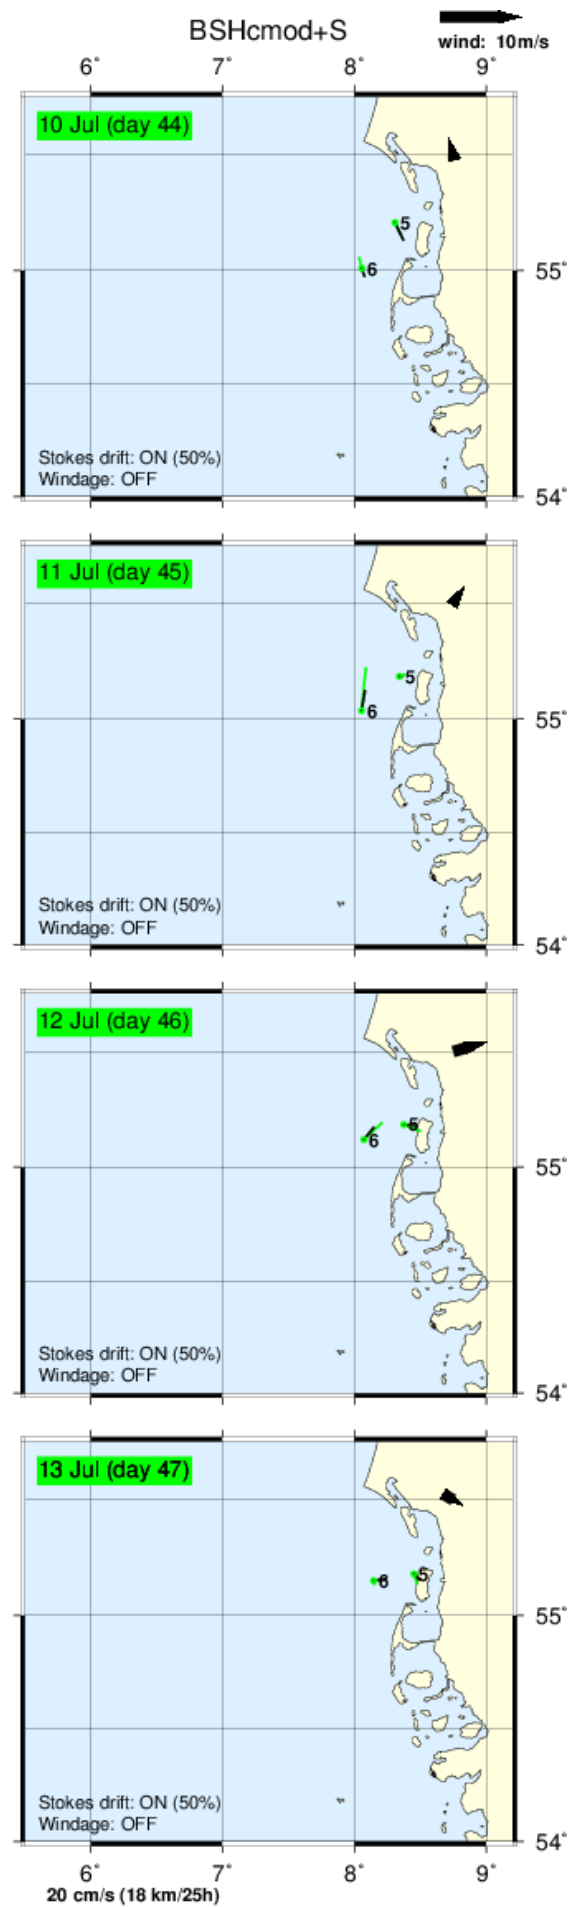

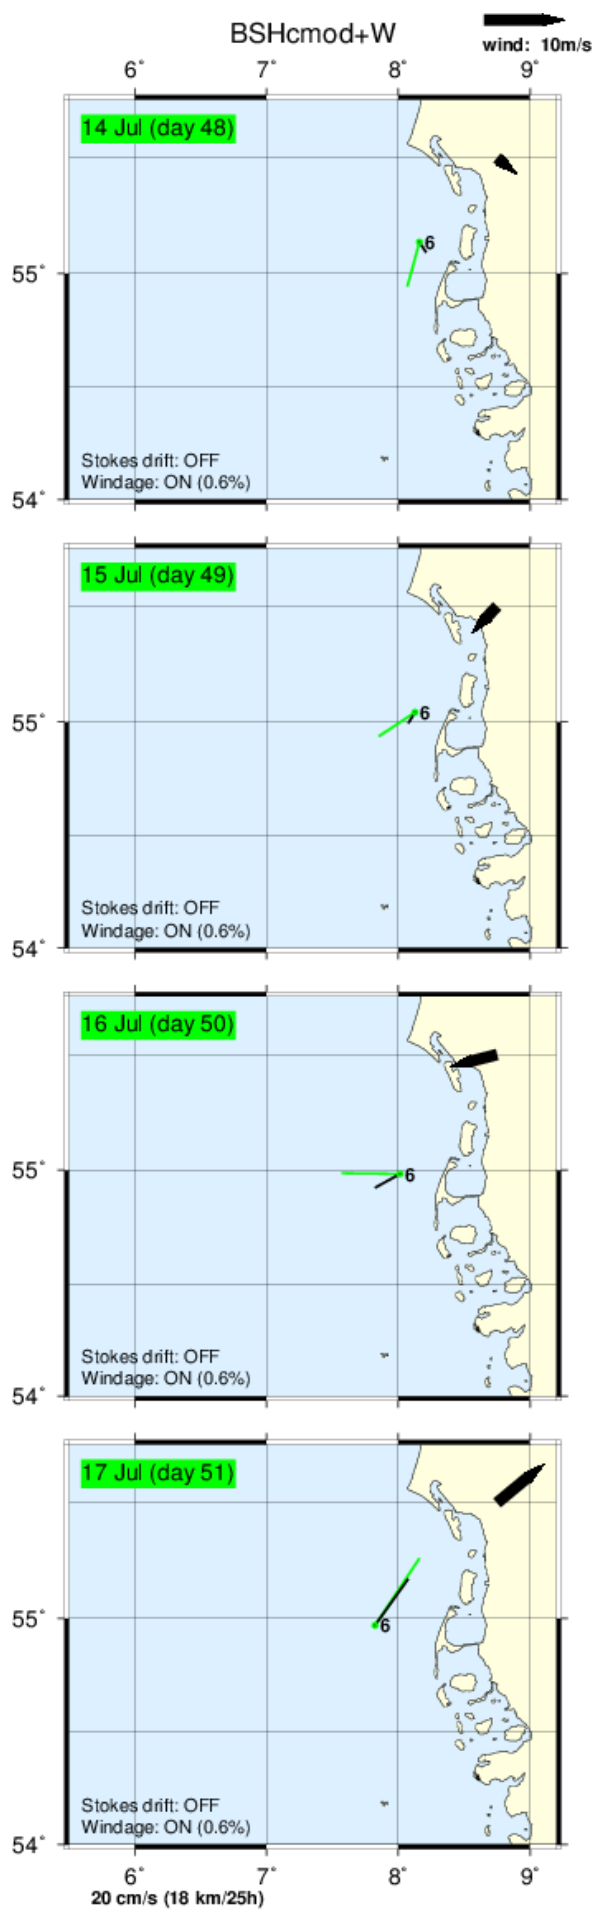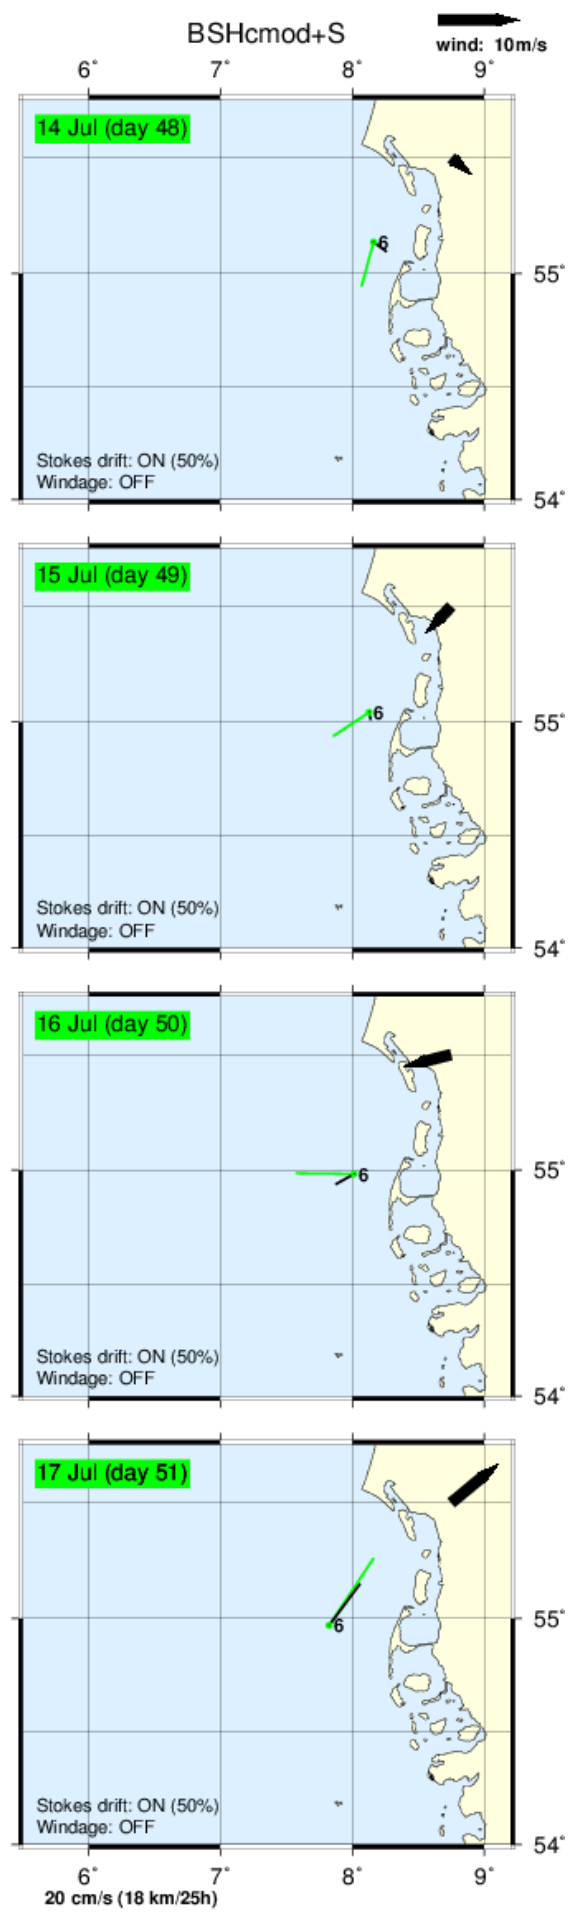

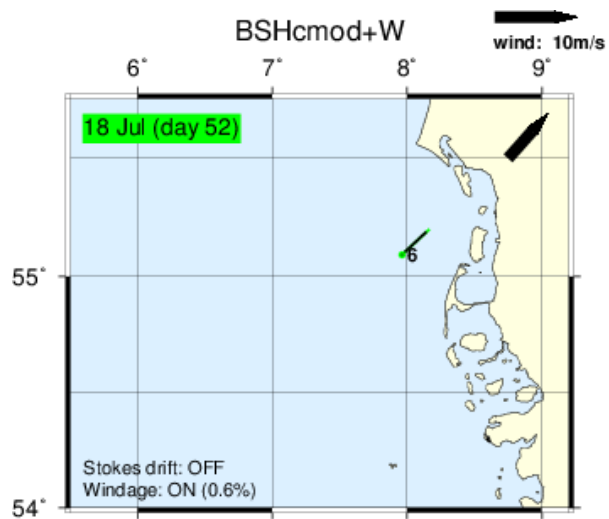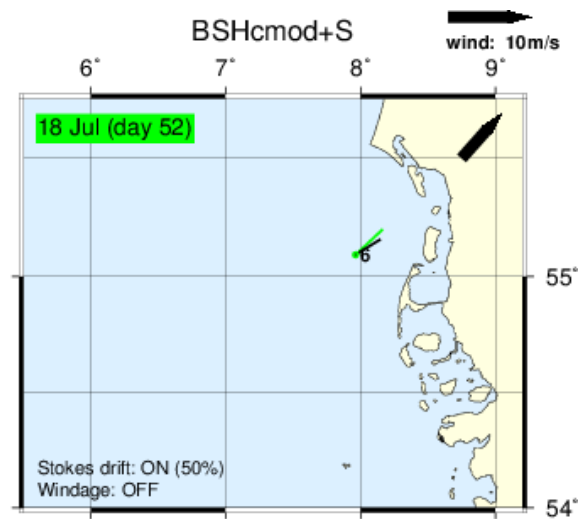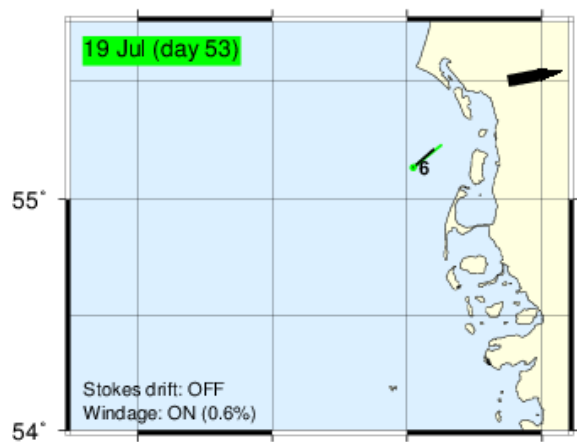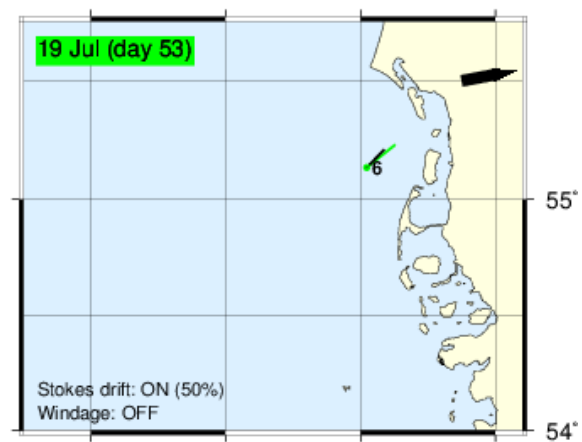

Supplement: Supplementary file 3 [file os-13-799-2017-supplement.zip]



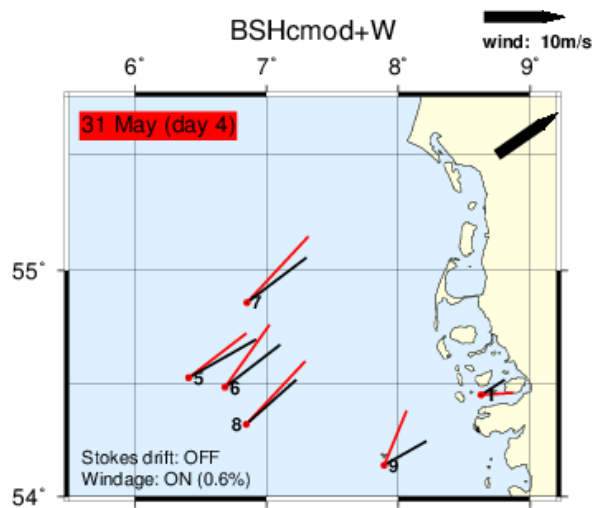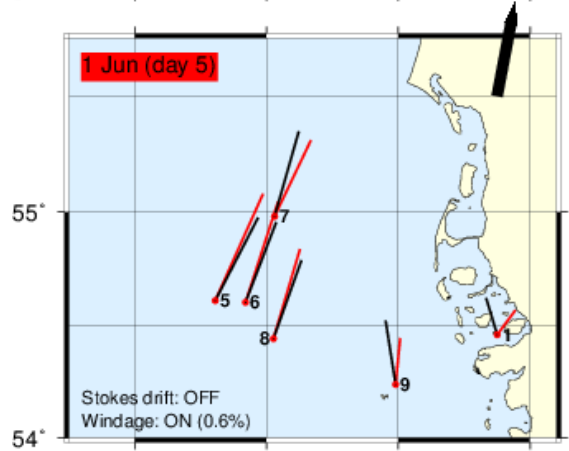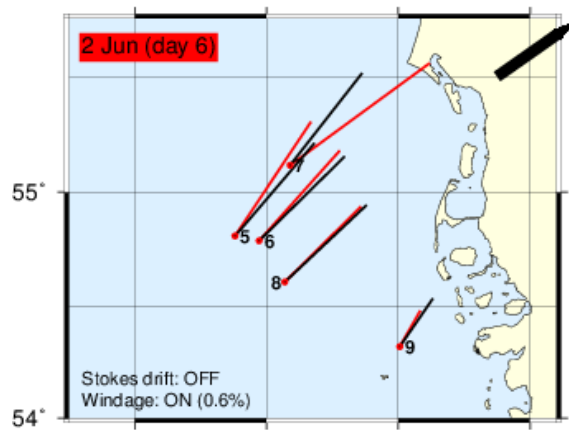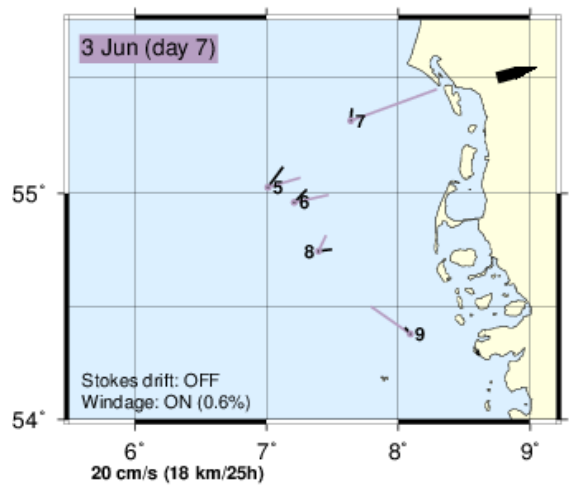

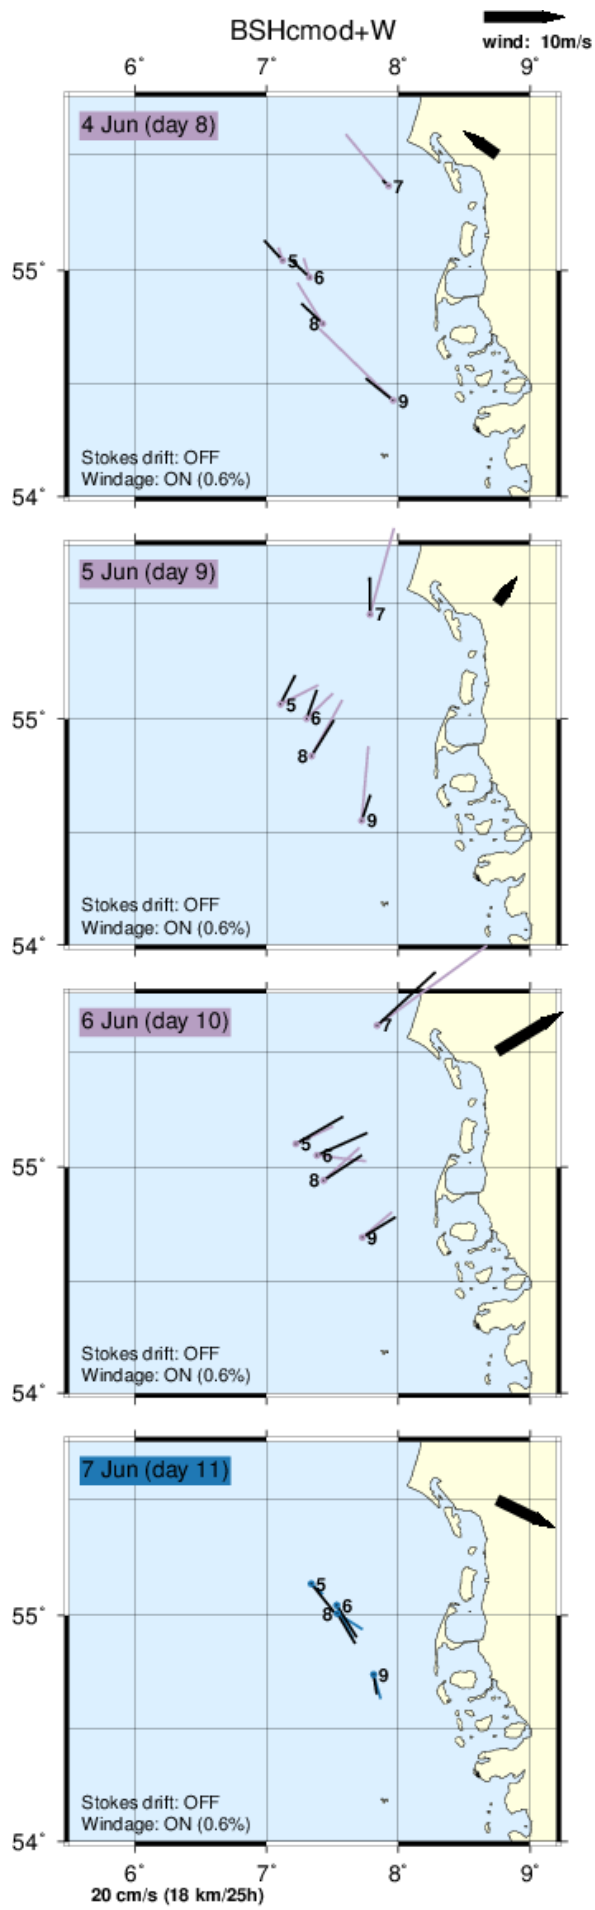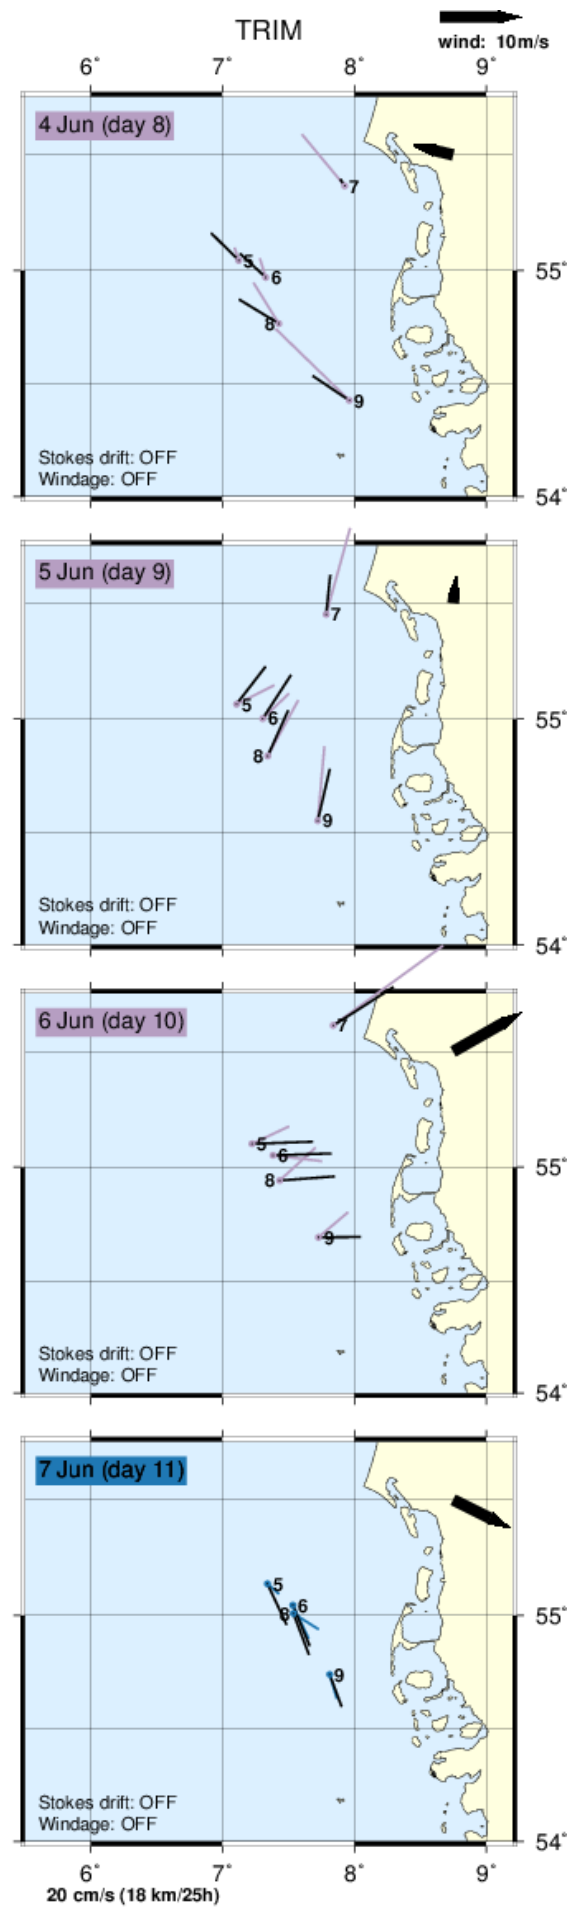

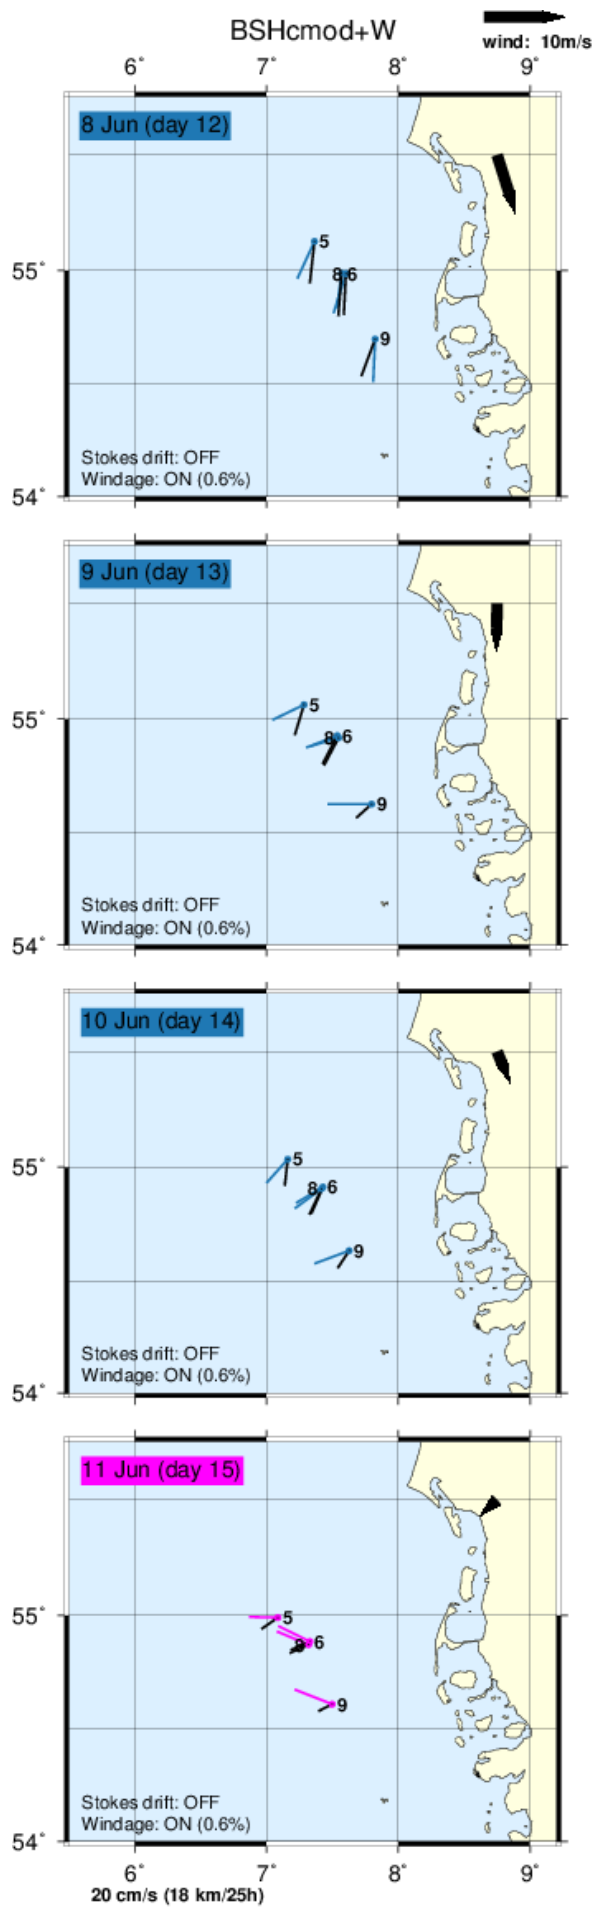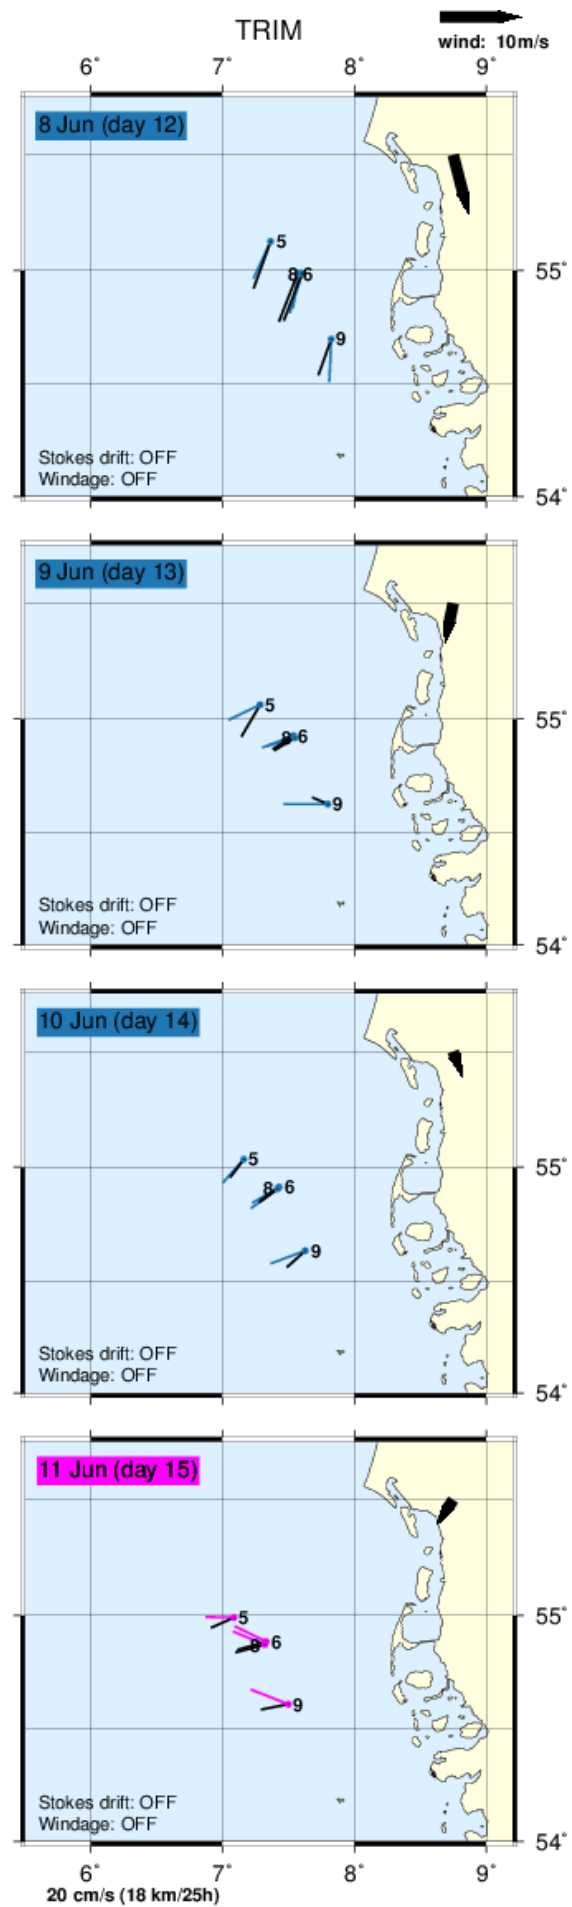

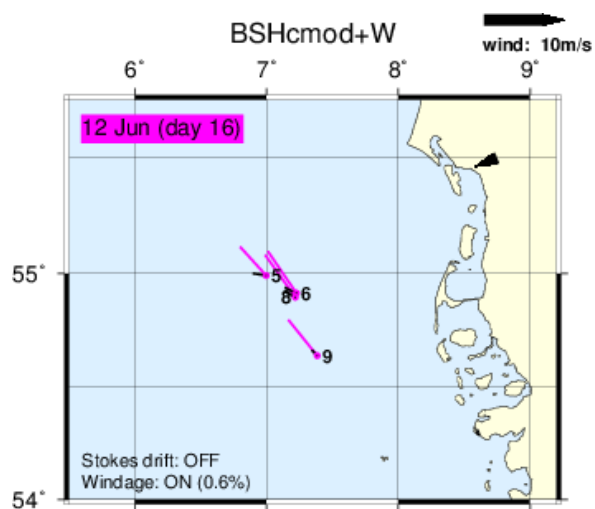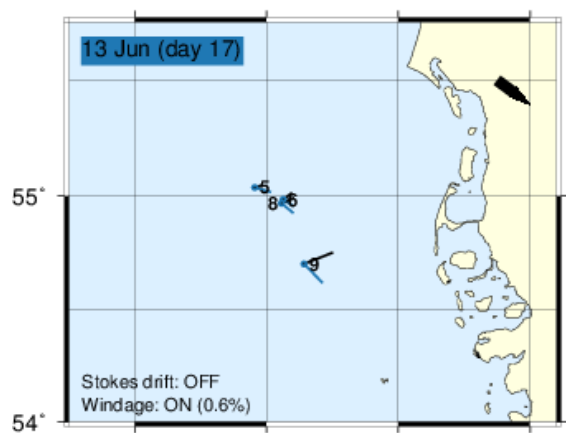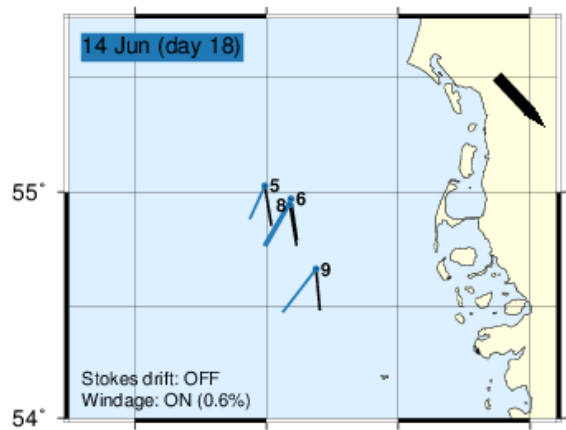

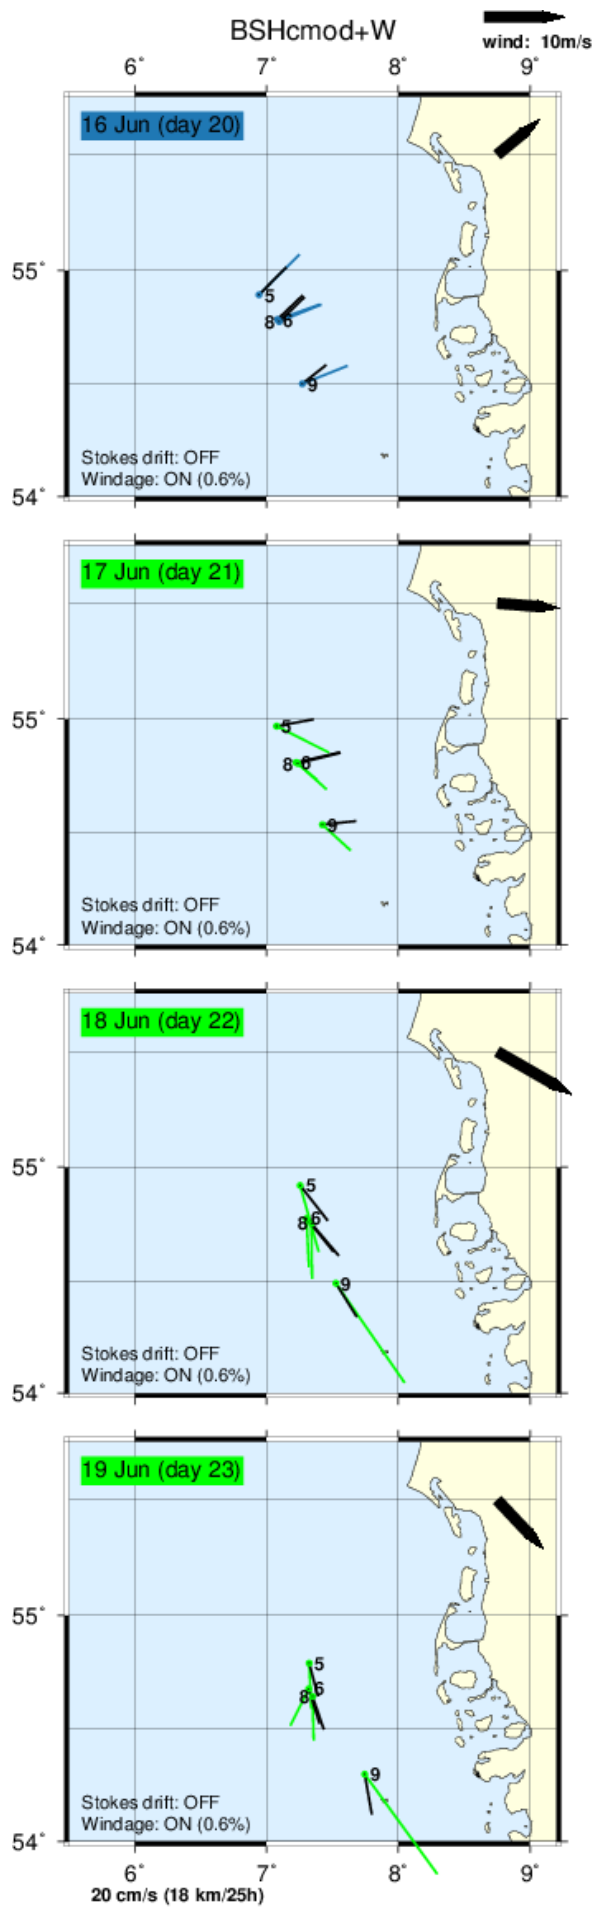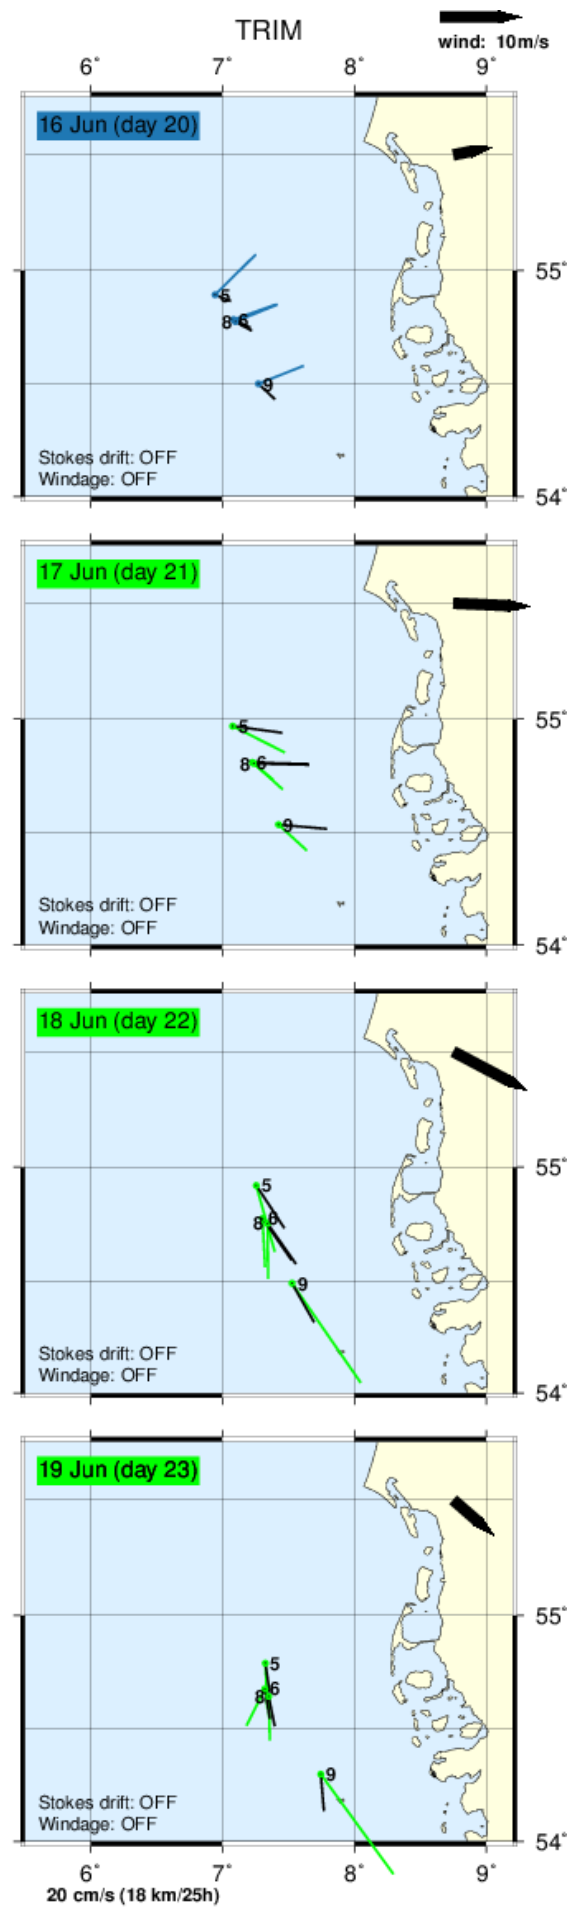

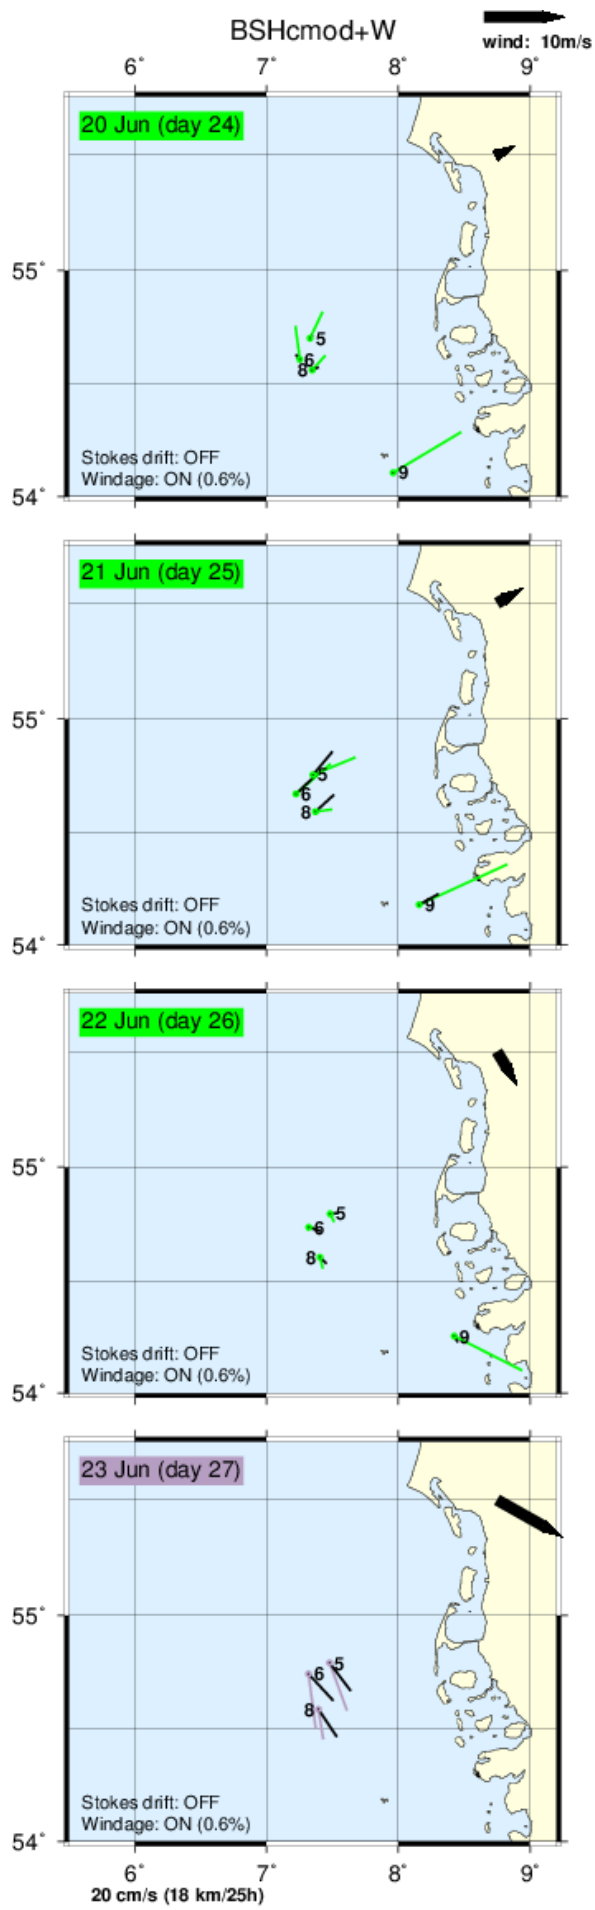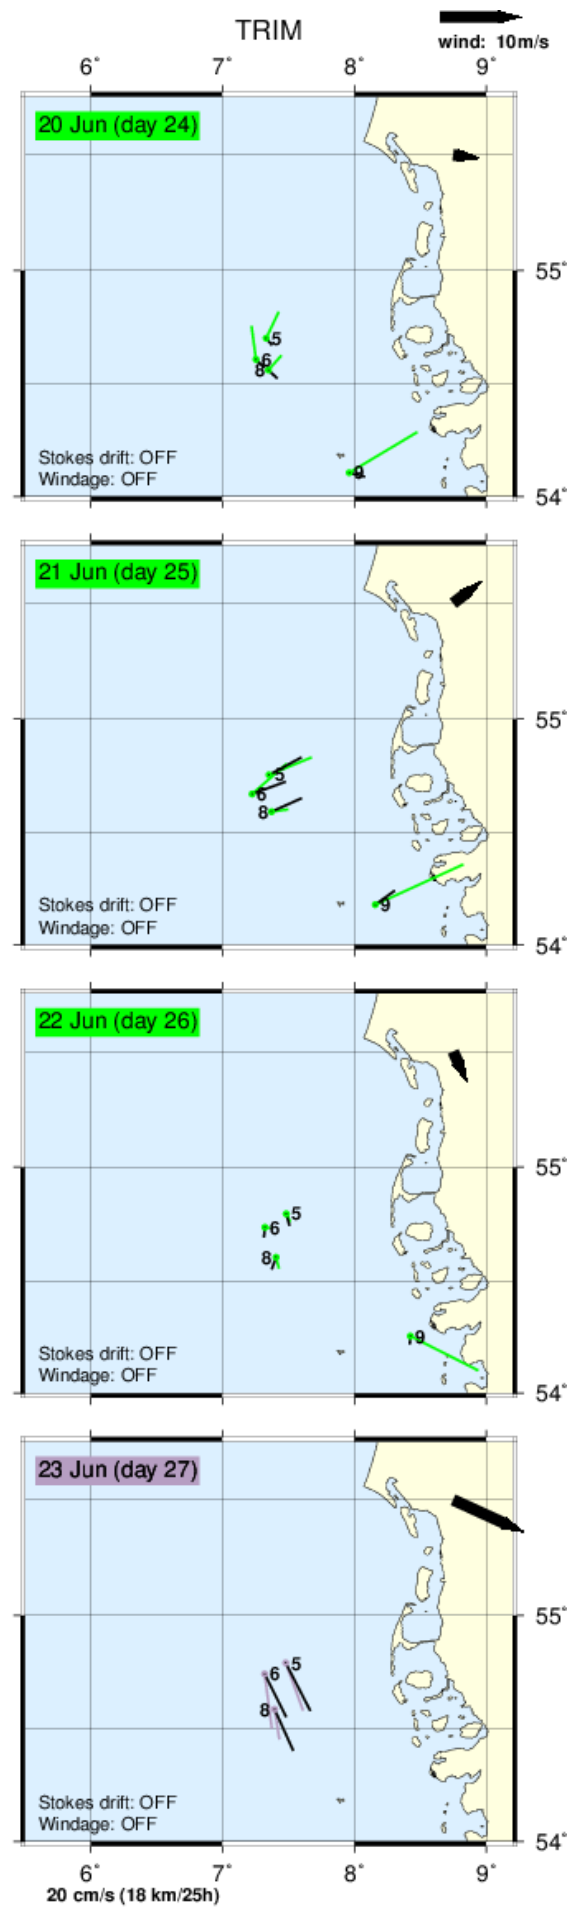

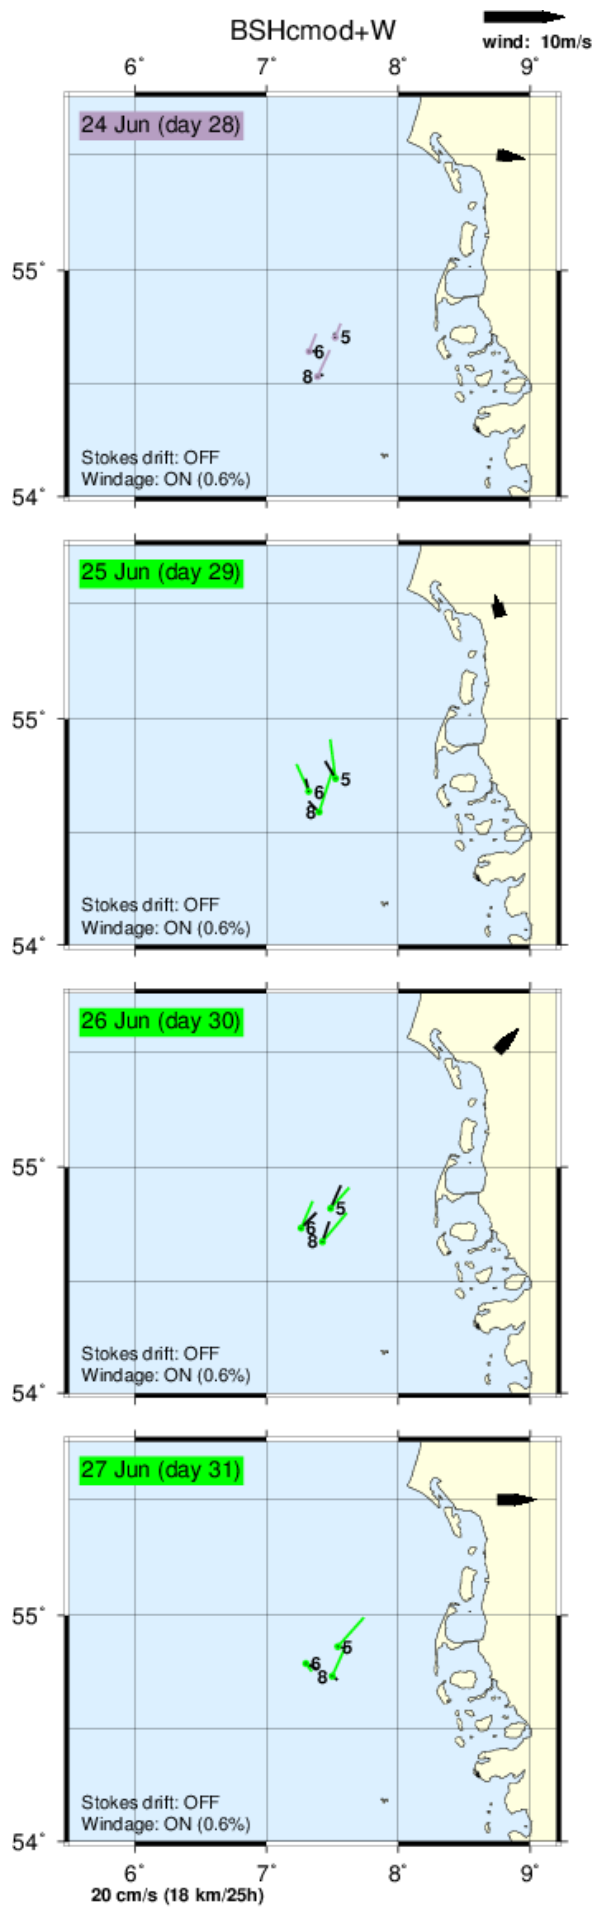



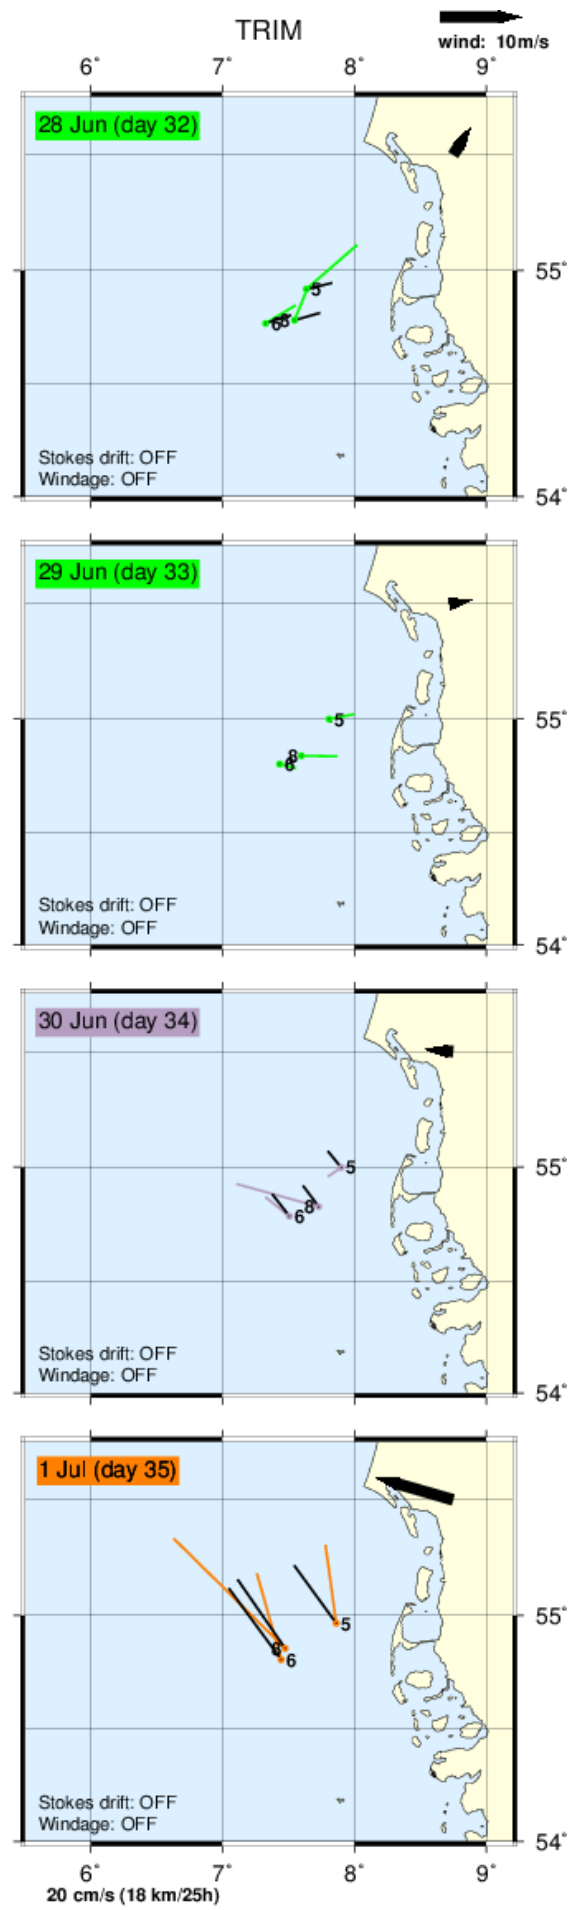

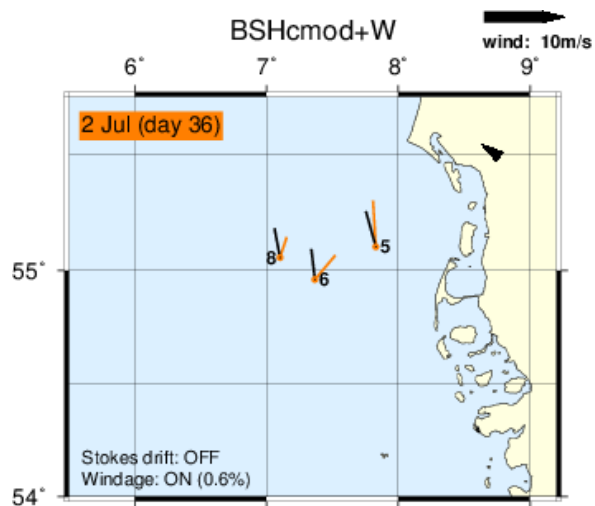

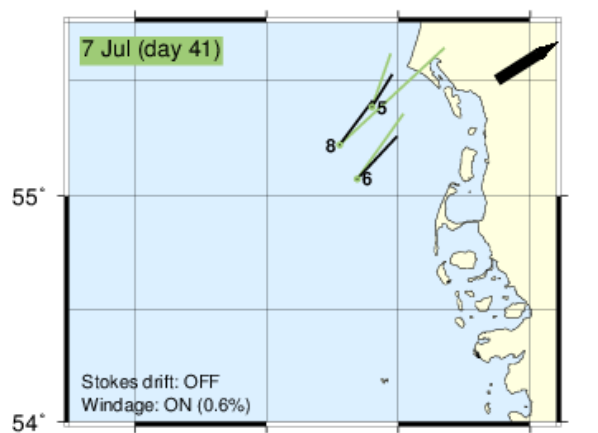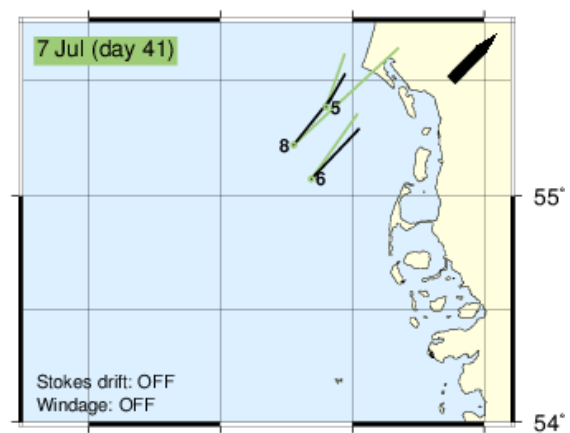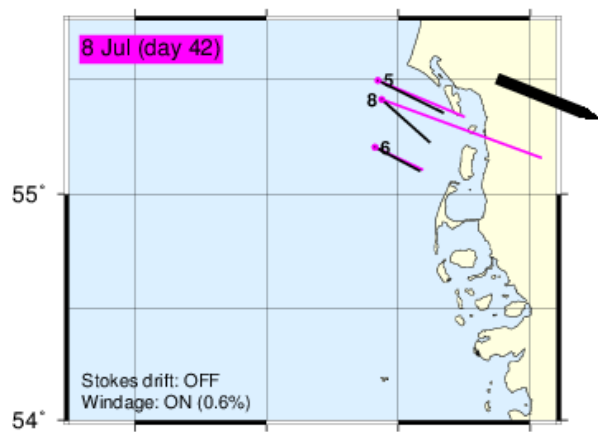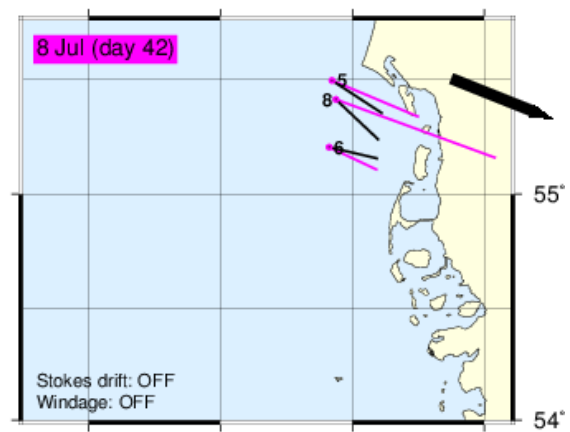

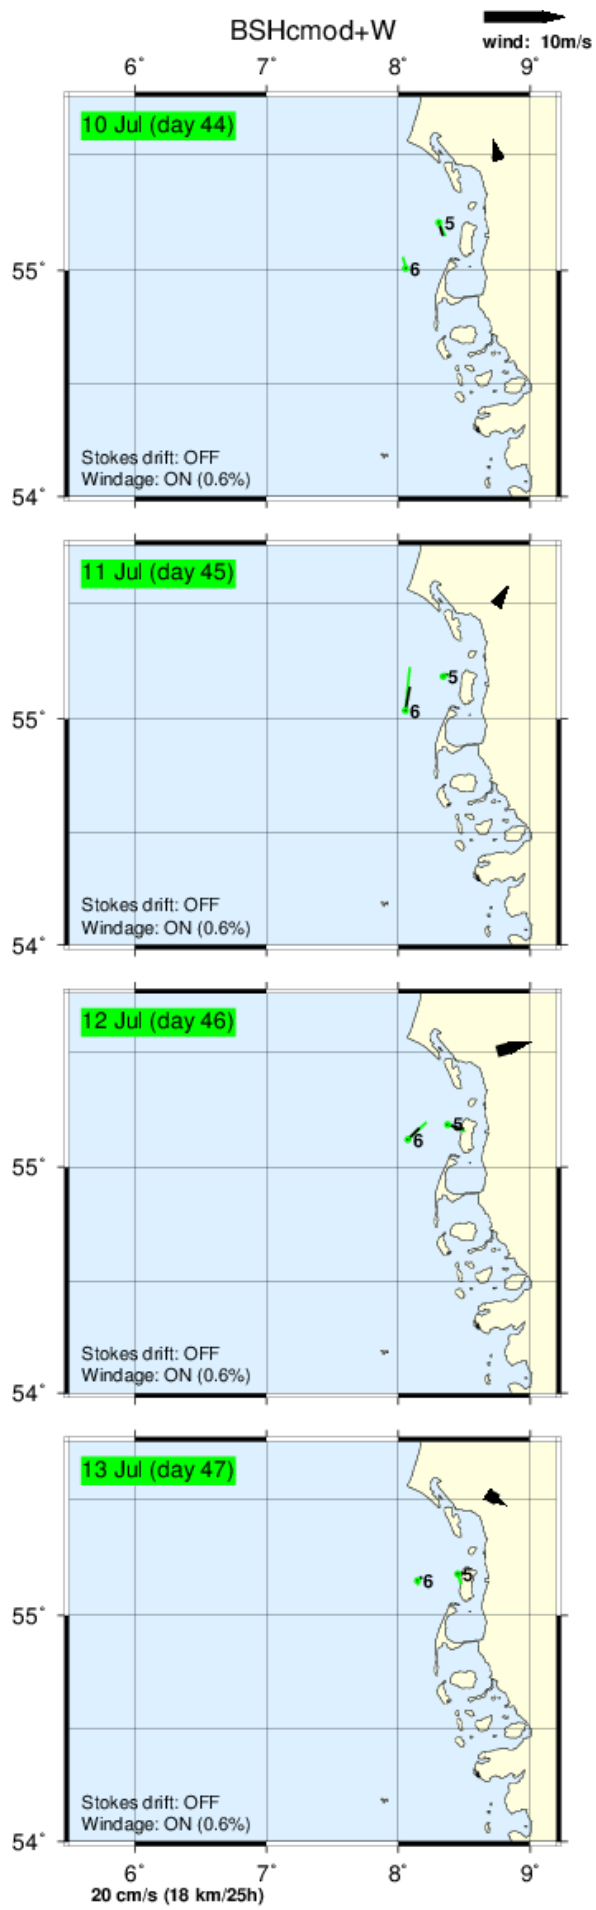

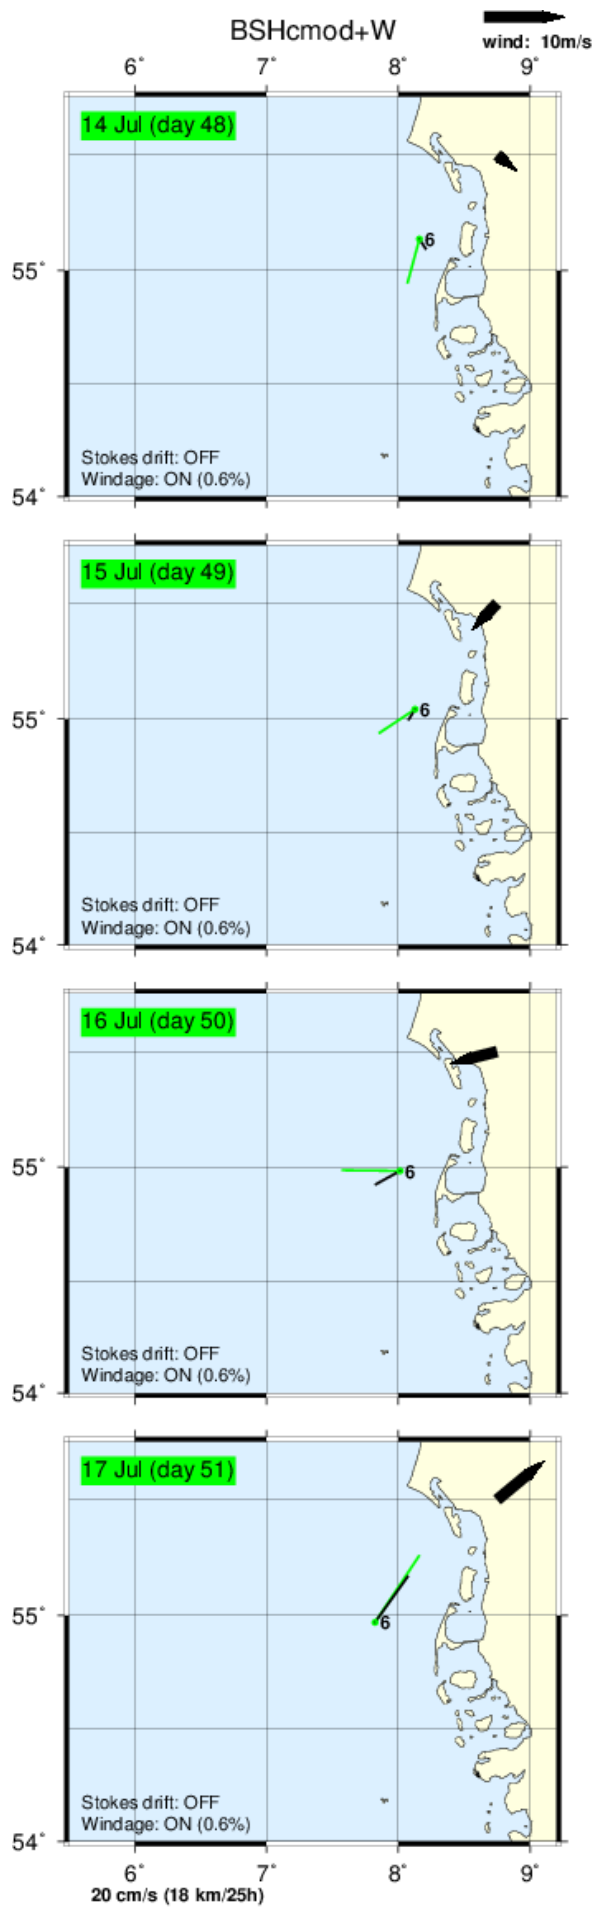

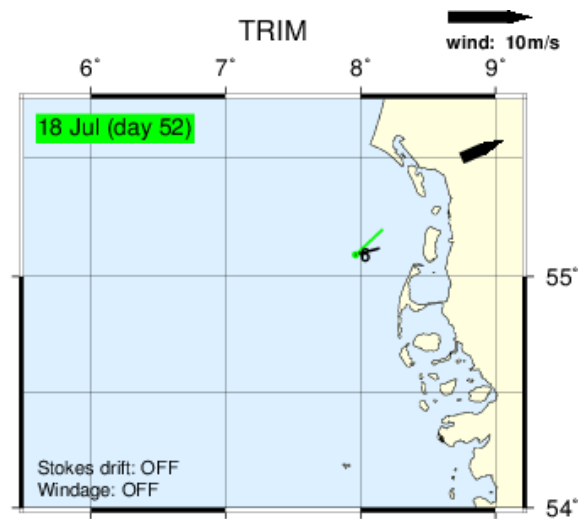

Supplement: Supplementary file 5 [file os-13-799-2017-supplement.zip]
